# Supplementary material for: Clinical characteristics and genetic expansion of 46,XY disorders of sex development children in a Chinese prospective study
Source: PubMed Central journal article supplement — Endocr Connect. 2023 Sep 4;12(10):e230029. doi: 10.1530/EC-23-0029 (PMC10503230; doi:10.1530/ec-23-0029), 2023-09-04
Supplement: supplementary_table_1.pdf [file supplementary_table_1.pdf]

**Supplementary Table 1.** 2742 confirmed disease-causing genes targeted in this study

| Gene   | Disorder*                                                                                                                                                                                                                                                               |
|--------|-------------------------------------------------------------------------------------------------------------------------------------------------------------------------------------------------------------------------------------------------------------------------|
| A2M    | Alpha-2-macroglobulin deficiency, 614036 (1)/Alzheimer disease, susceptibility to, 104300 (3)                                                                                                                                                                           |
| AAAS   | Achalasia-addisonianism-alacrimia syndrome, 231550 (3)                                                                                                                                                                                                                  |
| AAGAB  | Keratoderma, palmoplantar, punctate type IA, 148600 (3)                                                                                                                                                                                                                 |
| AARS   | Charcot-Marie-Tooth disease, axonal, type 2N, 613287 (3)                                                                                                                                                                                                                |
| AARS2  | Combined oxidative phosphorylation deficiency 8, 614096 (3)/Leukoencephalopathy, progressive, with ovarian failure, 615889 (3)                                                                                                                                          |
| AASS   | Hyperlysinemia, 238700 (3)/Saccharopinuria, 268700 (1)                                                                                                                                                                                                                  |
| ABAT   | GABA-transaminase deficiency, 613163 (3)                                                                                                                                                                                                                                |
| ABCA1  | HDL deficiency, type 2, 604091 (3)/Tangier disease, 205400 (3)/Coronary artery disease in familial hypercholesterolemia, protection against, 143890 (3)                                                                                                                 |
| ABCA12 | Ichthyosis, autosomal recessive 4B (harlequin), 242500 (3)/Ichthyosis, congenital, autosomal recessive 4A, 601277 (3)                                                                                                                                                   |
| ABCA3  | Surfactant metabolism dysfunction, pulmonary, 3, 610921 (3)                                                                                                                                                                                                             |
| ABCA4  | Cone-rod dystrophy 3, 604116 (3)/Fundus flavimaculatus, 248200 (3)/Retinal dystrophy, early-onset severe, 248200 (3)/Retinitis pigmentosa 19, 601718 (3)/Stargardt disease 1, 248200 (3)/Macular degeneration, age-related, 2, 153800 (3)                               |
| ABCB1  | Colchicine resistance, 120080 (3)/Inflammatory bowel disease 13, 612244 (3)                                                                                                                                                                                             |
| ABCB11 | Cholestasis, benign recurrent intrahepatic, 2, 605479 (3)/Cholestasis, progressive familial intrahepatic 2, 601847 (3)                                                                                                                                                  |
| ABCB4  | Cholestasis, intrahepatic, of pregnancy, 3, 614972 (3)/Cholestasis, progressive familial intrahepatic 3, 602347 (3)/Gallbladder disease 1, 600803 (3)                                                                                                                   |
| ABCB6  | Dyschromatosis universalis hereditaria 3, 615402 (3)/Microphthalmia, isolated, with coloboma 7, 614497 (3)/[Blood group, Langeris system], 111600 (3)                                                                                                                   |
| ABCB7  | Anemia, sideroblastic, with ataxia, 301310 (3)                                                                                                                                                                                                                          |
| ABCC11 | [Axillary odor, variation in], 117800 (3)/[Colostrum secretion, variation in], 117800 (3)/[Earwax, wet/dry], 117800 (3)                                                                                                                                                 |
| ABCC2  | Dubin-Johnson syndrome, 237500 (3)                                                                                                                                                                                                                                      |
| ABCC6  | Arterial calcification, generalized, of infancy, 2, 614473 (3)/Pseudoxanthoma elasticum, 264800 (3)/Pseudoxanthoma elasticum, forme fruste, 177850 (3)                                                                                                                  |
| ABCC8  | Diabetes mellitus, noninsulin-dependent, 125853 (3)/Diabetes mellitus, permanent neonatal, 606176 (3)/Diabetes mellitus, transient neonatal 2, 610374 (3)/Hyperinsulinemic hypoglycemia, familial, 1, 256450 (3)/Hypoglycemia of infancy, leucine-sensitive, 240800 (3) |
| ABCC9  | Atrial fibrillation, familial, 12, 614050 (3)/Cardiomyopathy, dilated, 10, 608569 (3)/Hypertrichotic osteochondrodysplasia, 239850 (3)                                                                                                                                  |
| ABCD1  | Adrenoleukodystrophy, 300100 (3)/Adrenomyeloneuropathy, adult, 300100 (3)                                                                                                                                                                                               |
| ABCD3  | Bile acid synthesis defect, congenital, 5                                                                                                                                                                                                                               |
| ABCD4  | Methylmalonic aciduria and homocystinuria, cbIJ type, 614857 (3)                                                                                                                                                                                                        |
| ABCG5  | Sitosterolemia, 210250 (3)                                                                                                                                                                                                                                              |
| ABCG8  | Gallbladder disease 4, 611465 (3)/Sitosterolemia, 210250 (3)                                                                                                                                                                                                            |
| ABHD12 | Polyneuropathy, hearing loss, ataxia, retinitis pigmentosa, and cataract, 612674 (3)                                                                                                                                                                                    |
| ABHD5  | Chanarin-Dorfman syndrome, 275630 (3)                                                                                                                                                                                                                                   |
| ABL1   | Leukemia, Philadelphia chromosome-positive, resistant to imatinib (3)                                                                                                                                                                                                   |
| ACACA  | Acetyl-CoA carboxylase deficiency, 613933 (1)                                                                                                                                                                                                                           |
| ACAD8  | Isobutyryl-CoA dehydrogenase deficiency, 611283 (3)                                                                                                                                                                                                                     |
| ACAD9  | ACAD9 deficiency, 611126 (3)                                                                                                                                                                                                                                            |
| ACADL  | long-chain acyl-CoA dehydrogenase (LCAD) deficiency                                                                                                                                                                                                                     |
| ACADM  | Acyl-CoA dehydrogenase, medium chain, deficiency of, 201450 (3)                                                                                                                                                                                                         |
| ACADS  | Acyl-CoA dehydrogenase, short-chain, deficiency of, 201470 (3)                                                                                                                                                                                                          |
| ACADSB | 2-methylbutyrylglucosuria, 610006 (3)                                                                                                                                                                                                                                   |
| ACADVL | VLCAD deficiency, 201475 (3)                                                                                                                                                                                                                                            |
| ACAN   | Osteochondritis dissecans, short stature, and early-onset osteoarthritis, 165800 (3)/Spondyloepimetaphyseal dysplasia, aggrecan type, 612813 (3)/Spondyloepiphyseal dysplasia, Kimberley type, 608361 (3)                                                               |

ACAT1 Alpha-methylacetoacetic aciduria, 203750 (3)  
ACAT2 ACAT2 deficiency, 614055 (1)  
Renal tubular dysgenesis, 267430 (3)/[Angiotensin I-converting enzyme, benign serum increase]  
ACE (3)/Alzheimer disease, susceptibility to, 104300 (3)/Microvascular complications of diabetes 3, 612624  
(3)/Myocardial infarction, susceptibility to (3)/SARS, progression of (3)/Stroke, hemorrhagic, 614519 (3)  
ACO2 Infantile cerebellar-retinal degeneration, 614559 (3)  
ACOX1 Peroxisomal acyl-CoA oxidase deficiency, 264470 (3)  
ACP2 Lysosomal acid phosphatase deficiency, 200950 (1)  
ACP5 Spondyloenchondrodysplasia with immune dysregulation, 607944 (3)  
ACSF3 Combined malonic and methylmalonic aciduria, 614265 (3)  
ACSL4 Mental retardation, X-linked 63, 300387 (3)  
Myopathy, actin, congenital, with cores, 161800 (3)/Myopathy, actin, congenital, with excess of thin  
myofilaments, 161800 (3)/Myopathy, congenital, with fiber-type disproportion 1, 255310 (3)/Nemaline  
myopathy 3, autosomal dominant or recessive, 161800 (3)  
ACTA1 Aortic aneurysm, familial thoracic 6, 611788 (3)/Moyamoya disease 5, 614042 (3)/Multisystemic smooth  
muscle dysfunction syndrome, 613834 (3)  
ACTA2 Baraitser-Winter syndrome 1, 243310 (3)/Dystonia, juvenile-onset, 607371 (3)  
ACTB Atrial septal defect 5, 612794 (3)/Cardiomyopathy, dilated, 1R, 613424 (3)/Cardiomyopathy, familial  
hypertrophic, 11, 612098 (3)/Left ventricular noncompaction 4, 613424 (3)  
ACTC1 Baraitser-Winter syndrome 2, 614583 (3)/Deafness, autosomal dominant 20/26, 604717 (3)  
ACTG1 Cardiomyopathy, dilated, 1AA, 612158 (3)  
ACTN2 Glomerulosclerosis, focal segmental, 1, 603278 (3)  
ACTN4 Fibrodysplasia ossificans progressiva, 135100 (3)  
ACVR1 Heterotaxy, visceral, 4, autosomal, 613751 (3)  
ACVR2B Telangiectasia, hereditary hemorrhagic, type 2, 600376 (3)  
ACVRL1 Aminoacylase 1 deficiency, 609924 (3)  
ACY1 Adenosine deaminase deficiency, partial, 102700 (3)/Severe combined immunodeficiency due to ADA  
deficiency, 102700 (3)  
ADA Inflammatory skin and bowel disease, neonatal, 1, 614328 (3)  
ADAM17 Cone-rod dystrophy 9, 612775 (3)  
ADAM9 Weill-Marchesani syndrome 1, recessive, 277600 (3)  
ADAMTS10 Thrombotic thrombocytopenic purpura, familial, 274150 (3)  
ADAMTS13 Weill-Marchesani-like syndrome, 613195 (3)  
ADAMTS17 Microcornea, myopic chorioretinal atrophy, and telecanthus, 615458 (3)  
ADAMTS18 Ehlers-Danlos syndrome, type VIIC, 225410 (3)  
ADAMTS2 Geleophysic dysplasia 1, 231050 (3)  
ADAMTSL2 Ectopia lentis et pupillae, 225200 (3)/Ectopia lentis, isolated, autosomal recessive, 225100 (3)  
ADAMTSL4 Aicardi-Goutieres syndrome 6, 615010 (3)/Dyschromatosis symmetrica hereditaria, 127400 (3)  
ADAR Coenzyme Q10 deficiency, primary, 4, 612016 (3)  
ADCK3 Dyskinesia, familial, with facial myokymia, 606703 (3)  
ADCY5 Adiponectin deficiency, 612556 (3)  
ADIPOQ Hypermethioninemia due to adenosine kinase deficiency, 614300 (3)  
ADK Epilepsy, familial adult myoclonic 2  
ADRA2B Adenylosuccinase deficiency, 103050 (3)  
ADSL Mental retardation, X-linked, FRAXE type, 309548 (3)  
AFF2 Ataxia, spastic, 5, autosomal recessive, 614487 (3)/Spinocerebellar ataxia 28, 610246 (3)  
AFG3L2 Alpha-fetoprotein deficiency, 615969 (3)/[Hereditary persistence of alpha-fetoprotein], 615970 (3)  
AFP Aspartylglucosaminuria, 208400 (3)  
AGA Cataract 38, autosomal recessive, 614691 (3)/Sengers syndrome, 212350 (3)  
AGK Glycogen storage disease IIIa, 232400 (3)/Glycogen storage disease IIIb, 232400 (3)  
AGL Lipodystrophy, congenital generalized, type 1, 608594 (3)  
AGPAT2 Rhizomelic chondrodysplasia punctata, type 3, 600121 (3)  
AGPS Myasthenic syndrome, congenital, with pre- and postsynaptic defects, 615120 (3)  
AGRN

AGT Renal tubular dysgenesis, 267430 (3)/Hypertension, essential, susceptibility to, 145500 (3)/Preeclampsia, susceptibility to (3)

AGTR1 Hypertension, essential, 145500 (3)/Renal tubular dysgenesis, 267430 (3)

AGTR2 AGTR2-Related X-Linked Intellectual Disability (XLID)

AGXT Hyperoxaluria, primary, type 1, 259900 (3)

AHICY Hypermethioninemia with deficiency of S-adenosylhomocysteine hydrolase, 613752 (3)

AHI1 Joubert syndrome-3, 608629 (3)

AICDA Immunodeficiency with hyper-IgM, type 2, 605258 (3)

AIFM1 Combined oxidative phosphorylation deficiency 6, 300816 (3)/Cowchock syndrome, 310490 (3)

AIMP1 Leukodystrophy, hypomyelinating, 3, 260600 (3)

AIP Pituitary adenoma, ACTH-secreting, 219090 (3)/Pituitary adenoma, growth hormone-secreting, 102200 (3)/Pituitary adenoma, prolactin-secreting, 600634 (3)

AIPL1 Cone-rod dystrophy, 604393 (3)/Leber congenital amaurosis 4, 604393 (3)/Retinitis pigmentosa, juvenile, 604393 (3)

AIRE Autoimmune polyendocrinopathy syndrome, type I, with or without reversible metaphyseal dysplasia, 240300 (3)

AK1 Hemolytic anemia due to adenylate kinase deficiency, 612631 (3)

AK2 Reticular dysgenesis, 267500 (3)

AKAP9 Long QT syndrome-11, 611820 (3)

AKR1C2 46XY sex reversal 8, 614279 (3)/Obesity, hyperphagia, and developmental delay (3)

AKR1D1 Bile acid synthesis defect, congenital, 2, 235555 (3)

AKT1 Breast cancer, somatic, 114480 (3)/Colorectal cancer, somatic, 114500 (3)/Cowden syndrome 6, 615109 (3)/Ovarian cancer, somatic, 167000 (3)/Proteus syndrome, somatic, 176920 (3)/Schizophrenia, susceptibility to, 181500 (2)

AKT2 Diabetes mellitus, type II, 125853 (3)/Hypoinsulinemic hypoglycemia with hemihypertrophy, 240900 (3)

AKT3 Megalencephaly-polymicrogyria-polydactyly-hydrocephalus syndrome 2, 615937 (3)

ALAD Porphyria, acute hepatic, 612740 (3)/Lead poisoning, susceptibility to, 612740 (3)

ALAS2 Anemia, sideroblastic, X-linked, 300751 (3)/Protoporphyrin, erythropoietic, X-linked, 300752 (3)

ALDH18A1 Cutis laxa, autosomal recessive, type IIIA, 219150 (3)

ALDH2 Alcohol sensitivity, acute

ALDH3A2 Sjogren-Larsson syndrome, 270200 (3)

ALDH4A1 Hyperprolinemia, type II, 239510 (3)

ALDH5A1 Succinic semialdehyde dehydrogenase deficiency, 271980 (3)

ALDH6A1 Methylmalonate semialdehyde dehydrogenase deficiency, 614105 (3)

ALDH7A1 Epilepsy, pyridoxine-dependent, 266100 (3)

ALDOA Glycogen storage disease XII, 611881 (3)

ALDOB Fructose intolerance, 229600 (3)

ALG1 Congenital disorder of glycosylation, type Ik, 608540 (3)

ALG10 Long QT syndrome, acquired, reduced susceptibility to, 613688 (3)

ALG11 Congenital disorder of glycosylation, type Ip, 613661 (3)

ALG12 Congenital disorder of glycosylation, type Ig, 607143 (3)

ALG13 Congenital disorder of glycosylation, type Is, 300884 (3)

ALG2 Congenital disorder of glycosylation, type Ii, 607906 (3)/Myasthenic syndrome, congenital, with tubular aggregates 3, 616228 (3)

ALG3 Congenital disorder of glycosylation, type Id, 601110 (3)

ALG6 Congenital disorder of glycosylation, type Ic, 603147 (3)

ALG8 Congenital disorder of glycosylation, type Ih, 608104 (3)

ALG9 Congenital disorder of glycosylation, type Il, 608776 (3)

ALK Neuroblastoma, susceptibility to, 3, 613014 (3)

ALMS1 Alstrom syndrome, 203800 (3)

ALOX12B Ichthyosis, congenital, autosomal recessive 2, 242100 (3)

ALOXE3 Ichthyosis, congenital, autosomal recessive 3, 606545 (3)

ALPL Hypophosphatasia, adult, 146300 (3)/Hypophosphatasia, childhood, 241510 (3)/Hypophosphatasia, infantile, 241500 (3)/Odontohypophosphatasia, 146300 (3)

ALS2 Amyotrophic lateral sclerosis 2, juvenile, 205100 (3)/Primary lateral sclerosis, juvenile, 606353 (3)/Spastic paralysis, infantile onset ascending, 607225 (3)

ALX1 Frontonasal dysplasia 3, 613456 (3)

ALX3 Frontonasal dysplasia 1, 136760 (3)

ALX4 Frontonasal dysplasia 2, 613451 (3)/Parietal foramina 2, 609597 (3)/Craniosynostosis 5, susceptibility to, 615529 (3)

AMACR Alpha-methylacyl-CoA racemase deficiency, 614307 (3)/Bile acid synthesis defect, congenital, 4, 214950 (3)

AMELX Amelogenesis imperfecta, type 1E, 301200 (3)

AMELY Oligozoospermia

AMER1 Osteopathia striata with cranial sclerosis, 300373 (3)

AMH Persistent Mullerian duct syndrome, type I, 261550 (3)

AMHR2 Persistent Mullerian duct syndrome, type II, 261550 (3)

AMN Megaloblastic anemia-1, Norwegian type, 261100 (3)

AMPD1 Myopathy due to myoadenylate deaminase deficiency, 615511 (3)

AMT Glycine encephalopathy, 605899 (3)

ANG Amyotrophic lateral sclerosis 9, 611895 (3)

ANGPTL3 Hypobetalipoproteinemia, familial, 2, 605019 (3)

ANK1 Spherocytosis, type 1, 182900 (3)

ANK2 Cardiac arrhythmia, ankyrin-B-related, 600919 (3)/Long QT syndrome 4, 600919 (3)

ANKH Chondrocalcinosis 2, 118600 (3)/Craniometaphyseal dysplasia, 123000 (3)

ANKRD11 KBG syndrome, 148050 (3)

ANKRD26 Thrombocytopenia 2, 188000 (3)

ANO10 Spinocerebellar ataxia, autosomal recessive 10, 613728 (3)

ANO5 Gnathodiaphyseal dysplasia, 166260 (3)/Miyoshi muscular dystrophy 3, 613319 (3)/Muscular dystrophy, limb-girdle, type 2L, 611307 (3)

ANO6 Scott syndrome, 262890 (3)

ANTXR2 Hyaline fibromatosis syndrome, 228600 (3)

AP1S2 Mental retardation, X-linked syndromic 5, 304340 (3)

AP3B1 Hermansky-Pudlak syndrome 2, 608233 (3)

AP4B1 Spastic paraplegia 47, autosomal recessive, 614066 (3)

AP4E1 Spastic paraplegia 51, autosomal recessive, 613744 (3)

AP4M1 Spastic paraplegia 50, autosomal recessive, 612936 (3)

AP4S1 Spastic paraplegia 52, autosomal recessive, 614067 (3)

AP5Z1 Spastic paraplegia 48

APC Adenoma, periampullary, somatic (3)/Adenomatous polyposis coli, 175100 (3)/Brain tumor-polyposis syndrome 2, 175100 (3)/Colorectal cancer, somatic, 114500 (3)/Desmoid disease, hereditary, 135290 (3)/Gardner syndrome, 175100 (3)/Gastric cancer, somatic, 613659 (3)/Hepatoblastoma, somatic, 114550 (3)

APCDD1 Hypotrichosis 1, 605389 (3)

APOA1 Amyloidosis, 3 or more types, 105200 (3)/ApoA-I and apoC-III deficiency, combined (3)/Corneal clouding, autosomal recessive (3)/Hypoalphalipoproteinemia, 604091 (3)

APOA4 Hyperlipidaemia

APOA5 Hyperchylomicronemia, late-onset, 144650 (3)/Hypertriglyceridemia, susceptibility to, 145750 (3)

APOB Hypercholesterolemia, due to ligand-defective apo B, 144010 (3)/Hypobetalipoproteinemia, 615558 (3)

APOC2 Hyperlipoproteinemia, type Ib, 207750 (3)

APOC3 Apolipoprotein C-III deficiency, 614028 (3)

APOE Alzheimer disease-2, 104310 (3)/Hyperlipoproteinemia, type III (3)/Lipoprotein glomerulopathy, 611771 (3)/Sea-blue histiocyte disease, 269600 (3)/

APOL1 End-stage renal disease, nondiabetic, susceptibility to, 612551 (3)/Glomerulosclerosis, focal segmental, 4, susceptibility to, 612551 (3)

APP Alzheimer disease 1, familial, 104300 (3)/Cerebral amyloid angiopathy, Dutch, Italian, Iowa, Flemish, Arctic variants, 605714 (3)

APRT Adenine phosphoribosyltransferase deficiency, 614723 (3)

APTX Ataxia, early-onset, with oculomotor apraxia and hypoalbuminemia, 208920 (3)

AQP2 Diabetes insipidus, nephrogenic, 125800 (3)

AR Androgen insensitivity, 300068 (3)/Androgen insensitivity, partial, with or without breast cancer, 312300 (3)/Hypospadias 1, X-linked, 300633 (3)/Spinal and bulbar muscular atrophy of Kennedy, 313200 (3)/Prostate cancer, susceptibility to, 176807 (3)

ARFGEF2 Periventricular heterotopia with microcephaly, 608097 (3)

ARG1 Argininemia, 207800 (3)

ARHGAP26 Leukemia, juvenile myelomonocytic, 607785 (3)

ARHGAP31 Adams-Oliver syndrome 1, 100300 (3)

ARHGEF10 Slowed nerve conduction velocity, AD, 608236 (3)

ARHGEF12 Leukemia, acute myeloid, 601626 (3)

ARHGEF6 Mental retardation, X-linked 46, 300436 (3)

ARHGEF9 Epileptic encephalopathy, early infantile, 8, 300607 (3)

ARID1A Mental retardation, autosomal dominant 14, 614607 (3)

ARID1B Mental retardation, autosomal dominant 12, 614562 (3)

ARL13B Joubert syndrome 8, 612291 (3)

ARL6 Retinitis pigmentosa 55, 613575 (3)/Bardet-Biedl syndrome 3, 600151 (3)/Bardet-Biedl syndrome 1, modifier of, 209900 (3)

ARSA Metachromatic leukodystrophy, 250100 (3)

ARSB Mucopolysaccharidosis type VI (Maroteaux-Lamy), 253200 (3)

ARSE Chondrodysplasia punctata, X-linked recessive, 302950 (3)

ARX Epileptic encephalopathy, early infantile, 1, 308350 (3)/Hydranencephaly with abnormal genitalia, 300215 (3)/Lissencephaly, X-linked 2, 300215 (3)/Mental retardation, X-linked 29 and others, 300419 (3)/Partington syndrome, 309510 (3)/Proud syndrome, 300004 (3)

ASAH1 Farber lipogranulomatosis, 228000 (3)/Spinal muscular atrophy with progressive myoclonic epilepsy, 159950 (3)

ASCC1 Barrett esophagus/esophageal adenocarcinoma, 614266 (3)

ASCC3 Intellectual disability

ASCL1 Central hypoventilation syndrome, congenital, 209880 (3)/Haddad syndrome, 209880 (3)

ASL Argininosuccinic aciduria, 207900 (3)

ASNS Asparagine synthetase deficiency, 615574 (3)

ASPA Canavan disease, 271900 (3)

ASPM Microcephaly 5, primary, autosomal recessive, 608716 (3)

ASPSCR1 Alveolar soft-part sarcoma, 606243 (3)

ASS1 Citrullinemia, 215700 (3)

ASXL1 Bohring-Opitz syndrome, 605039 (3)/Myelodysplastic syndrome, somatic, 614286 (3)

ASXL3 Bainbridge-Ropers syndrome, 615485 (3)

ATCAY Ataxia, cerebellar, Cayman type, 601238 (3)

ATIC AICA-ribosiduria due to ATIC deficiency, 608688 (3)

ATL1 Neuropathy, hereditary sensory, type ID, 613708 (3)/Spastic paraplegia 3A, autosomal dominant, 182600 (3)

ATM Ataxia-telangiectasia, 208900 (3)/Lymphoma, B-cell non-Hodgkin, somatic (3)/Lymphoma, mantle cell (3)/T-cell prolymphocytic leukemia, somatic (3)/Breast cancer, susceptibility to, 114480 (3)

ATN1 Dentatorubro-pallidoluysian atrophy, 125370 (3)

ATP13A2 Ceroid lipofuscinosis, neuronal, 12, 606693 (3)/Kufor-Rakeb syndrome, 606693 (3)

ATP1A2 Alternating hemiplegia of childhood, 104290 (3)/Migraine, familial basilar, 602481 (3)/Migraine, familial hemiplegic, 2, 602481 (3)

ATP1A3 Alternating hemiplegia of childhood 2, 614820 (3)/CAPOS syndrome, 601338 (3)/Dystonia-12, 128235 (3)

ATP2A1 Brody myopathy, 601003 (3)

ATP2A2 Acrokeratosis verruciformis, 101900 (3)/Darier disease, 124200 (3)

ATP2B3 Spinocerebellar ataxia, X-linked 1, 302500 (3)

ATP2C1 Hailey-Hailey disease, 169600 (3)

ATP5E Mitochondrial complex V (ATP synthase) deficiency, nuclear type 3, 614053 (3)

ATP6AP2 Mental retardation, X-linked, syndromic, Hedera type, 300423 (3)/

ATP6V0A2 Cutis laxa, autosomal recessive, type IIA, 219200 (3)/Wrinkly skin syndrome, 278250 (3)

ATP6V0A4 Renal tubular acidosis, distal, autosomal recessive, 602722 (3)

ATP6V1B1 Renal tubular acidosis

ATP7A Menkes disease, 309400 (3)/Occipital horn syndrome, 304150(3)/Spinal muscular atrophy, distal, X-linked 3, 300489 (3)

ATP7B Wilson disease, 277900 (3)

ATP8B1 Cholestasis, benign recurrent intrahepatic, 243300 (3)/Cholestasis, intrahepatic, of pregnancy, 1, 147480 (3)/Cholestasis, progressive familial intrahepatic 1, 211600 (3)

ATPAF2 Mitochondrial complex V (ATP synthase) deficiency, nuclear type 1, 604273 (3)

ATR Cutaneous telangiectasia and cancer syndrome, familial, 614564 (3)/Seckel syndrome 1, 210600 (3)

ATRX Alpha-thalassemia myelodysplasia syndrome, somatic, 300448 (3)/Alpha-thalassemia/mental retardation syndrome, 301040 (3)/Mental retardation-hypotonic facies syndrome, X-linked, 309580 (3)

ATXN1 Spinocerebellar ataxia 1, 164400 (3)

ATXN10 Spinocerebellar ataxia 10, 603516 (3)

ATXN2 Spinocerebellar ataxia 2, 183090 (3)/Amyotrophic lateral sclerosis, susceptibility to, 13, 183090 (3)

ATXN3 Machado-Joseph disease, 109150 (3)

ATXN7 Spinocerebellar ataxia 7, 164500 (3)

ATXN8 Spinocerebellar ataxia 8, 608768 (3)

AUH 3-methylglutaconic aciduria, type I, 250950 (3)

AURKC Infertility, male

AVP Diabetes insipidus, neurohypophyseal, 125700 (3)

AVPR2 Diabetes insipidus, nephrogenic, 304800 (3)/Nephrogenic syndrome of inappropriate antidiuresis, 300539 (3)

AXIN1 Caudal duplication anomaly, 607864 (3)/Hepatocellular carcinoma, somatic, 114550(3)

AXIN2 Colorectal cancer, somatic, 114500 (3)/Oligodontia-colorectal cancer syndrome, 608615 (3)

B2M Hypoproteinemia, hypercatabolic, 241600 (3)

B3GALTL Peters-plus syndrome, 261540 (3)

B3GAT3 Multiple joint dislocations, short stature, craniofacial dysmorphism, and congenital heart defects, 245600 (3)

B4GALT1 Congenital disorder of glycosylation, type II d, 607091 (3)

B4GALT1-AS1 Congenital disorder of glycosylation, type II d 607091 (3)

B4GALT7 Ehlers-Danlos syndrome, progeroid type, 1, 130070(3)

B9D1 Meckel syndrome 9, 614209 (3)

B9D2 Meckel syndrome 10, 614175 (3)

BAAT Hypercholanemia, familial, 607748 (3)

BAG3 Cardiomyopathy, dilated, 1HH, 613881 (3)/Myopathy, myofibrillar, 6, 612954 (3)

BANF1 Nestor-Guillermo progeria syndrome, 614008 (3)

BAP1 Tumor predisposition syndrome, 614327 (3)

BBS1 Bardet-Biedl syndrome 1, 209900 (3)

BBS10 Bardet-Biedl syndrome 10, 615987 (3)

BBS12 Bardet-Biedl syndrome 12, 615989 (3)

BBS2 Bardet-Biedl syndrome 2, 615981 (3)

BBS4 Bardet-Biedl syndrome 4, 615982 (3)

BBS5 Bardet-Biedl syndrome 5, 615983 (3)

BBS7 Bardet-Biedl syndrome 7, 615984 (3)

BBS9 Bardet-Biedl syndrome

BCHE Apnea, postanesthetic (3)

BCKDHA Maple syrup urine disease, type Ia, 248600 (3)

BCKDHB Maple syrup urine disease, type Ib, 248600 (3)

BCKDK Branched-chain ketoacid dehydrogenase kinase deficiency, 614923(3)

BCL10 Immunodeficiency 37, 616098 (3)/Lymphoma, MALT, somatic, 137245 (3)/Lymphoma, follicular, somatic, 613024 (3)/Male germ cell tumor, somatic, 273300, (3)/Mesothelioma, somatic, 156240 (3)/Sezary syndrome, somatic, (3)

BCL11A Dias-Logan syndrome, 617101 (3)

BCL2 Leukemia/lymphoma, B-cell, 2 (3)

BCL3 Leukemia/lymphoma, B-cell, 3 (2)

BCMO1 Hypercarotenemia and vitamin A deficiency, autosomal dominant, 115300 (3)

BCOR Microphthalmia, syndromic 2, 300166 (3)

BCR Leukemia, acute lymphocytic, 613065 (3)/Leukemia, chronic myeloid, 608232 (3)

BCS1L Bjornstad syndrome, 262000 (3)/GRACILE syndrome, 603358 (3)/Leigh syndrome, 256000 (3)/Mitochondrial complex III deficiency, nuclear type 1, 124000 (3)

BDNF Central hypoventilation syndrome, congenital, 209880 (3)/Anorexia nervosa, susceptibility to, 610269 (3)/Bulimia nervosa, age of onset of weight loss in, 607499 (3)/Memory impairment, susceptibility to (3)/Obsessive-compulsive disorder, protection against, 164230 (3)

BEAN1 Spinocerebellar ataxia 31

BEST1 Bestrophinopathy, autosomal recessive, 611809 (3)/Microcornea, rod-cone dystrophy, cataract, and posterior staphyloma, 193220 (3)/Retinitis pigmentosa, concentric, 613194 (3)/Retinitis pigmentosa-50, 613194 (3)/Vitelliform macular dystrophy 2, 153700 (3)/Vitreoretinchoroidopathy, 193220 (3)

BFSP1 Cataract 33, 611391 (3)

BFSP2 Cataract 12, multiple types, 611597 (3)

BHLHA9 Syndactyly, mesoaxial synostotic, with phalangeal reduction, 609432 (3)

BIN1 Myopathy, centronuclear, autosomal recessive, 255200 (3)

BLK Maturity-onset diabetes of the young, type 11, 613375 (3)

BLM Bloom syndrome

BLNK Agammaglobulinemia 4, 613502 (3)

BLOC1S3 Hermansky-Pudlak syndrome 8, 614077 (3)

BLOC1S6 Hermansky-pudlak syndrome 9, 614171 (3)

BLVRA Hyperbiliverdinemia, 614156 (3)

BMP1 Osteogenesis imperfecta, type XIII, 614856 (3)

BMP15 Ovarian dysgenesis 2, 300510 (3)/Premature ovarian failure 4, 300510 (3)

BMP2 Brachydactyly, type A2, 112600 (3)/HFE hemochromatosis, modifier of, 235200 (3)

BMP4 Microphthalmia, syndromic 6, 607932 (3)/Orofacial cleft 11, 600625 (3)

BMPER Diaphanospondylodysostosis, 608022 (3)

BMPR1A Juvenile polyposis syndrome, infantile form, 174900 (3)/Polyposis syndrome, hereditary mixed, 2, 610069 (3)/Polyposis, juvenile intestinal, 174900 (3)

BMPR1B Brachydactyly, type A2, 112600 (3)/Chondrodysplasia, acromesomelic, with genital anomalies, 609441 (3)

BMPR2 Pulmonary hypertension, familial primary, 1, with or without HHT, 178600 (3)/Pulmonary hypertension, primary, fenfluramine or dexfenfluramine-associated, 178600 (3)/Pulmonary venoocclusive disease 1, 265450 (3)

BOLA3 Multiple mitochondrial dysfunctions syndrome 2, 614299 (3)

BPGM Erythrocytosis due to bisphosphoglyceratemetase deficiency, 222800 (3)

BRAF Adenocarcinoma of lung, somatic, 211980 (3)/Cardiofaciocutaneous syndrome, 115150 (3)/Colorectal cancer, somatic (3)/LEOPARD syndrome 3, 613707 (3)/Melanoma, malignant, somatic (3)/Non-small cell lung cancer, somatic (3)/Noonan syndrome 7, 613706 (3)

BRAT1 Rigidity and multifocal seizure syndrome, lethal neonatal, 614498 (3)

BRCA1 Breast-ovarian cancer, familial, 1, 604370 (3)/Pancreatic cancer, susceptibility to, 4, 614320 (3)

BRCA2 Fanconi anemia, complementation group D1, 605724 (3)/Pancreatic cancer, 613347 (3)/Prostate cancer, 176807 (3)/Wilms tumor, 194070 (3)/Breast cancer, male, susceptibility to, 114480 (3)/Breast-ovarian cancer, familial, 2, 612555 (3)/Glioblastoma 3, 613029 (3)/Medulloblastoma, 155255 (3)/Pre-B-cell acute lymphoblastic leukemia (3)

BRIP1 Breast cancer, early-onset, 114480 (3)/Fanconi anemia, complementation group J, 609054 (3)

BRWD3 Mental retardation, X-linked 93, 300659 (3)

BSCL2 Encephalopathy, progressive, with or without lipodystrophy, 615924 (3)/Lipodystrophy, congenital generalized, type 2, 269700 (3)/Neuropathy, distal hereditary motor, type VA, 600794 (3)/Silver spastic paraplegia syndrome, 270685 (3)

BSND Bartter syndrome, type 4a, 602522 (3)/Sensorineural deafness with mild renal dysfunction, 602522 (3)

BTD Biotinidase deficiency, 253260 (3)

BTK Agammaglobulinemia and isolated hormone deficiency, 307200 (3)/Agammaglobulinemia, X-linked 1, 300755 (3)

BUB1B Colorectal cancer, somatic, 114500 (3)/Mosaic variegated aneuploidy syndrome 1, 257300 (3)/[Premature chromatid separation trait], 176430 (3)

Mitochondrial DNA depletion syndrome 7 (hepatocerebral type) 271245 (3)/Perrault syndrome 5 616138  
 C10orf2 (3)/Progressive external ophthalmoplegia with mitochondrial DNA deletions, autosomal dominant 3  
 609286 (3)  
 C11ORF46 Intellectual disability  
 C12ORF57 Temtamy syndrome, 218340 (3)  
 C12ORF65 Combined oxidative phosphorylation deficiency 7, 613559 (3)/Spastic paraplegia 55, autosomal recessive,  
 615035 (3)  
 C14ORF133 Arthrogyrosis, renal dysfunction, and cholestasis 2, 613404 (3)  
 C19ORF12 Spastic paraplegia 43, autosomal recessive, 615043 (3)/Neurodegeneration with brain iron accumulation 4,  
 614298 (3)  
 C1GALT1C1 Tn polyagglutination syndrome, somatic, 300622 (3)  
 C1QA C1q deficiency, 613652 (3)  
 C1QB C1q deficiency, 613652 (3)  
 C1QC C1q deficiency, 613652 (3)  
 C1QTNF5 Retinal degeneration, late-onset, autosomal dominant, 605670 (3)  
 C1R C1r/C1s deficiency, combined, 216950 (1)  
 C1S C1s deficiency, 613783 (3)  
 C2 C2 deficiency, 217000 (3)/Macular degeneration, age-related, 14, reduced risk of, 615489 (3)  
 C20ORF7 Complex I deficiency  
 C2ORF71 Retinitis pigmentosa 54, 613428 (3)  
 C3 C3 deficiency, 613779 (3)/Hemolytic uremic syndrome, atypical, susceptibility to, 5, 612925 (3)/Macular  
 degeneration, age-related, 9, 611378 (3)  
 C4A Systemic lupus erythematosus, susceptibility to or protection against, 152700 (2)/C4a deficiency, 614380  
 (3)/[Blood group, Rodgers], 614374 (3)  
 C4B C4B deficiency 614379 (3)  
 C4ORF26 Amelogenesis imperfecta, type IIA4, 614832 (3)  
 C5 C5 deficiency, 609536 (3)/[Eculizumab, poor response to], 615749 (3)  
 C5ORF42 Joubert syndrome 17, 614615 (3)/Orofaciodigital syndrome VI, 277170 (3)  
 C6 C6 deficiency, 612446 (3)/Combined C6/C7 deficiency (3)  
 C7 C7 deficiency, 610102 (3)  
 C8A C8 deficiency, type I, 613790 (3)  
 C8B C8 deficiency, type II, 613789 (3)  
 C8ORF37 Cone-rod dystrophy 16, 614500 (3)/Retinitis pigmentosa 64, 614500 (3)  
 C8ORF38 Complex I deficiency  
 C9 C9 deficiency, 613825 (3)/Macular degeneration, age-related, 15, susceptibility to, 615591 (3)  
 C9ORF72 Amyotrophic lateral sclerosis and/or frontotemporal dementia, 105550 (3)  
 C9ORF86 Intellectual disability  
 CA12 Hyperchlorhidrosis, isolated, 143860 (3)  
 CA2 Osteopetrosis, autosomal recessive 3, with renal tubular acidosis, 259730 (3)  
 CA4 Retinitis pigmentosa 17, 600852 (3)  
 CA8 Cerebellar ataxia and mental retardation with or without quadrupedal locomotion 3, 613227 (3)  
 CABP2 Deafness, autosomal recessive 93, 614899 (3)  
 CABP4 Night blindness, congenital stationary (incomplete), 2B, autosomal recessive, 610427 (3)  
 CACNA1A Episodic ataxia, type 2, 108500 (3)/Migraine, familial hemiplegic, 1, 141500 (3)/Migraine, familial  
 hemiplegic, 1, with progressive cerebellar ataxia, 141500 (3)/Spinocerebellar ataxia 6, 183086 (3)  
 CACNA1C Brugada syndrome 3, 611875 (3)/Timothy syndrome, 601005 (3)  
 CACNA1D Primary aldosteronism, seizures, and neurologic abnormalities, 615474 (3)/Sinoatrial node dysfunction and  
 deafness, 614896 (3)  
 CACNA1F Aland Island eye disease, 300600 (3)/Cone-rod dystrophy, X-linked, 3, 300476 (3)/Night blindness, congenital  
 stationary (incomplete), 2A, X-linked, 300071 (3)  
 CACNA1G Myoclonic epilepsy, juvenile  
 CACNA1H Epilepsy, childhood absence, susceptibility to, 6, 611942 (3)/Epilepsy, idiopathic generalized, susceptibility  
 to, 6, 611942 (3)



CACNA1S Hypokalemic periodic paralysis, type 1, 170400 (3)/Malignant hyperthermia susceptibility 5, 601887 (3)/Thyrotoxic periodic paralysis, susceptibility to, 1, 188580 (3)

CACNA2D4 Retinal cone dystrophy 4, 610478 (3)

cacnb2 Brugada syndrome

CACNB4 Episodic ataxia, type 5, 613855 (3)/Epilepsy, idiopathic generalized, susceptibility to, 9, 607682 (3)/Epilepsy, juvenile myoclonic, susceptibility to, 6, 607682 (3)

CACNG2 Mental retardation, autosomal dominant 10, 614256 (3)

CALM1 Ventricular tachycardia, catecholaminergic polymorphic, 4, 614916 (3)

CALR3 Cardiomyopathy, familial hypertrophic, 19, 613875 (3)

CAMTA1 Cerebellar ataxia, nonprogressive, with mental retardation, 614756 (3)

CANT1 Desbuquois dysplasia, 251450 (3)

CAPN10 Diabetes mellitus, noninsulin-dependent 1, 601283 (3)

CAPN3 Muscular dystrophy, limb-girdle, type 2A, 253600 (3)

CARD14 Pityriasis rubra pilaris, 173200 (3)/Psoriasis 2, 602723 (3)

CARD9 Candidiasis, familial, 2, autosomal recessive, 212050 (3)

CASC5 Microcephaly 4, primary, autosomal recessive, 604321 (3)

CASK FG syndrome 4, 300422 (3)/Mental retardation and microcephaly with pontine and cerebellar hypoplasia, 300749 (3)/Mental retardation, with or without nystagmus, 300422 (3)

CASP10 Autoimmune lymphoproliferative syndrome, type II, 603909 (3)/Gastric cancer, somatic, 613659 (3)/Non-Hodgkin lymphoma, somatic, 605027 (3)

CASP2 Intellectual disability

CASP8 Autoimmune lymphoproliferative syndrome, type IIB, 607271 (3)/Hepatocellular carcinoma, somatic, 114550 (3)/Breast cancer, protection against, 114480 (3)/Lung cancer, protection against, 211980 (3)

CASQ2 Ventricular tachycardia, catecholaminergic polymorphic, 2, 611938 (3)  
Hypercalciuric hypercalcemia (3)/Hyperparathyroidism, neonatal, 239200 (3)/Hypocalcemia, autosomal dominant, 601198 (3)/Hypocalcemia, autosomal dominant, with Bartter syndrome, 601198 (3)/Hypocalciuric hypercalcemia, type I, 145980 (3)/Calcium, serum level of (3)/Epilepsy idiopathic generalized, susceptibility to, 8, 612899 (3)

CASR

CAT Acatalasemia, 614097 (3)

CATSPER1 Spermatogenic failure 7, 612997 (3)

CAV1 Lipodystrophy, congenital generalized, type 3, 612526 (3)/  
Cardiomyopathy, familial hypertrophic, 192600 (3)/Creatine phosphokinase, elevated serum, 123320 (3)/Long QT syndrome 9, 611818 (3)/Muscular dystrophy, limb-girdle, type IC, 607801 (3)/Myopathy, distal, Tateyama type, 614321 (3)/Rippling muscle disease, 606072 (3)

CAV3

CBFB Myeloid leukemia, acute, M4/M4Eo subtype, somatic, 601626 (1)

CBL Noonan syndrome-like disorder with or without juvenile myelomonocytic leukemia, 613563 (3)

CBS Homocystinuria, B6-responsive and nonresponsive types, 236200 (3)/Thrombosis, hyperhomocysteinemic, 236200 (3)

CBX2 46XY sex reversal 5, 613080 (3)

CC2D1A Mental retardation, autosomal recessive 3, 608443 (3)

CC2D2A COACH syndrome, 216360 (3)/Joubert syndrome 9, 612285 (3)/Meckel syndrome 6, 612284 (3)

CCBE1 Hennekam lymphangiectasia-lymphedema syndrome 1, 235510 (3)

CCDC103 Ciliary dyskinesia, primary, 17, 614679 (3)

CCDC11 Heterotaxy, visceral, 6, autosomal recessive, 614779 (3)

CCDC39 Ciliary dyskinesia, primary, 14, 613807 (3)

CCDC39 Ciliary dyskinesia, primary, 14 613807 (3)

CCDC40 Ciliary dyskinesia, primary, 15, 613808 (3)

CCDC50 Deafness, autosomal dominant 44, 607453 (3)

CCDC6 Thyroid papillary carcinoma, 188550 (1)

CCDC78 Myopathy, centronuclear, 4, 614807 (3)

CCDC8 3-M syndrome 3, 614205 (3)

CCDC88C Spinocerebellar ataxia 40, 616053 (3)/Hydrocephalus, nonsyndromic, autosomal recessive, 236600 (3)

CCL11 Asthma, susceptibility to, 600807 (3)/HIV1, resistance to, 609423 (3)

CCM2 Cerebral cavernous malformations

CCND1 Colorectal cancer, susceptibility to, 114500 (3)/Multiple myeloma, susceptibility to, 254500 (3)/von Hippel-Lindau syndrome, modifier of, 193300 (3)

CCT5 Neuropathy, hereditary sensory, with spastic paraplegia, 256840 (3)

CD151 Nephropathy with pretibial epidermolysis bullosa and deafness, 609057 (3)/[Blood group, Raph], 179620 (3)

CD19 Immunodeficiency, common variable, 3, 613493 (3)

CD247 Immunodeficiency 25, 610163 (3)

CD2AP Glomerulosclerosis, focal segmental, 3, 607832 (3)

CD320 Methylmalonic aciduria due to transcobalamin receptor defect, 613646 (3)

CD36 Platelet glycoprotein IV deficiency, 608404 (3)/[Macrothrombocytopenia](1)/Coronary heart disease, susceptibility to, 7, 610938 (3)/Malaria, cerebral, reduced risk of, 611162 (3)/Malaria, cerebral, susceptibility to, 611162 (3)

CD3D Immunodeficiency 19, 615617 (3)

CD3E Immunodeficiency 18, 615615 (3)/Immunodeficiency 18, SCID variant, 615615 (3)

CD3G Immunodeficiency 17, CD3 gamma deficient, 615607 (3)

CD4 OKT4 epitope deficiency, 613949 (3)

CD40 Immunodeficiency with hyper-IgM, type 3, 606843 (3)

CD40LG Hyper-IgM syndrome

CD59 Hemolytic anemia, CD59-mediated, with or without immune-mediated polyneuropathy, 612300 (3)

CD79A Agammaglobulinemia 3, 613501 (3)

CD79B Agammaglobulinemia 6, 612692 (3)

CD81 Immunodeficiency, common variable, 6, 613496 (3)

CD81-AS1 Immunodeficiency, common variable, 6 613496 (3)

CD82 Prostate cancer, susceptibility to, 176807 (2)

CD8A CD8 deficiency, familial, 608957 (3)

CD96 C syndrome, 211750 (3)

CDAN1 Dyserythropoietic anemia, congenital, type Ia, 224120 (3)

CDC6 Meier-Gorlin syndrome 5, 613805 (3)

CDC73 Hyperparathyroidism-jaw tumour syndrome

CDH1 Endometrial carcinoma, somatic, 608089 (3)/Gastric cancer, familial diffuse, with or without cleft lip and/or palate, 137215 (3)/Ovarian carcinoma, somatic, 167000 (3)/Breast cancer, lobular, 114480 (3)/Prostate cancer, susceptibility to, 176807 (3)

CDH15 Mental retardation, autosomal dominant 3, 612580 (3)

CDH23 Deafness, autosomal recessive 12, 601386 (3)/Usher syndrome, type 1D, 601067 (3)/Usher syndrome, type 1D/F digenic, 601067 (3)

CDH3 Ectodermal dysplasia, ectrodactyly, and macular dystrophy, 225280 (3)/Hypotrichosis, congenital, with juvenile macular dystrophy, 601553 (3)

CDHR1 Cone-rod dystrophy 15, 613660 (3)/Retinitis pigmentosa 65, 613660 (3)

CDK4 Melanoma, cutaneous malignant, 3, 609048 (3)

CDK5RAP2 Microcephaly 3, primary, autosomal recessive, 604804 (3)

CDKL5 Angelman syndrome-like, 105830 (3)/Epileptic encephalopathy, early infantile, 2, 300672 (3)

CDKN1B Multiple endocrine neoplasia, type IV, 610755 (3)

CDKN1C Beckwith-Wiedemann syndrome, 130650 (3)/IMAGE syndrome, 614732 (3)

CDKN2A Melanoma

CDON Holoprosencephaly 11, 614226 (3)

CDSN Hypotrichosis 2, 146520 (3)/Peeling skin syndrome 1, 270300 (3)

CDT1 Meier-Gorlin syndrome 4, 613804 (3)

CEACAM16 Deafness, autosomal dominant 4B, 614614 (3)

CEBPA Leukemia, acute myeloid, 601626 (3)/Leukemia, acute myeloid, somatic, 601626 (3)

CEBPE Specific granule deficiency, 245480 (3)

CEL Maturity-onset diabetes of the young, type VIII, 609812 (3)

CENPJ Microcephaly 6, primary, autosomal recessive, 608393 (3)/Seckel syndrome 4, 613676 (3)

CEP135 Microcephaly 8, primary, autosomal recessive, 614673 (3)

CEP152 Microcephaly 9, primary, autosomal recessive, 614852 (3)/Seckel syndrome 5, 613823 (3)

CEP164 Nephronophthisis 15, 614845 (3)

CEP290 Bardet-Biedl syndrome 14, 615991 (3)/Joubert syndrome 5, 610188 (3)/Leber congenital amaurosis 10, 611755 (3)/Meckel syndrome 4, 611134 (3)/Senior-Loken syndrome 6, 610189 (3)

CEP41 Joubert syndrome 15, 614464 (3)

CEP57 Mosaic variegated aneuploidy syndrome 2, 614114 (3)

CEP63 Seckel syndrome 6, 614728 (3)

CERKL Retinitis pigmentosa 26, 608380 (3)

CES1 Carboxylesterase 1 deficiency (3)

CETP Hyperalphalipoproteinemia, 143470 (3)/[High density lipoprotein cholesterol level QTL 10], 143470 (3)

CFC1 Double-outlet right ventricle, 217095 (3)/Heterotaxy, visceral, 2, autosomal, 605376 (3)/Transposition of the great arteries, dextro-looped 2, 613853 (3)

CFD Complement factor D deficiency, 613912 (3)

CFH Haemolytic uraemic syndrome, atypical

CFHR2 Lowe C3 plasma levels & Factor B activation

CFHR5 Nephropathy due to CFHR5 deficiency, 614809 (3)

CFI Complement factor I deficiency, 610984 (3)/Hemolytic uremic syndrome, atypical, susceptibility to, 3, 612923 (3)/Macular degeneration, age-related, 13, susceptibility to, 615439 (3)

CFL2 Nemaline myopathy 7, autosomal recessive, 610687 (3)

CFP Properdin deficiency

CFTR Congenital bilateral absence of vas deferens, 277180 (3)/Cystic fibrosis, 219700 (3)/Sweat chloride elevation without CF (3)/Bronchiectasis with or without elevated sweat chloride 1, modifier of, 211400 (3)/Hypertrypsinemia, neonatal (3)/Pancreatitis, idiopathic, 167800 (3)

CHAT Myasthenic syndrome, congenital, associated with episodic apnea, 254210 (3)

CHD2 Epileptic encephalopathy, childhood-onset, 615369 (3)

CHD7 CHARGE syndrome, 214800 (3)/Hypogonadotropic hypogonadism 5 with or without anosmia, 612370 (3)/Scoliosis, idiopathic 3, 608765 (3)

CHEK2 Li-Fraumeni syndrome, 609265 (3)/Osteosarcoma, somatic, 259500 (3)/Breast and colorectal cancer, susceptibility to (3)/Breast cancer, susceptibility to, 114480 (3)/Prostate cancer, familial, susceptibility to, 176807 (3)

CHKB Muscular dystrophy, congenital, megaconial type, 602541 (3)

CHM Choroideremia, 303100 (3)

CHMP1A Pontocerebellar hypoplasia, type 8, 614961 (3)

CHMP2B Amyotrophic lateral sclerosis 17, 614696 (3)/Dementia, familial, nonspecific, 600795 (3)

CHMP4B Cataract 31, multiple types, 605387 (3)

CHN1 Duane retraction syndrome 2, 604356 (3)

CHRD1 Megalocornea 1, X-linked 309300 (3)

CHRM2 Cardiomyopathy, dilated

CHRM3 Eagle-Barrett syndrome, 100100 (3)

CHRNA1 Multiple pterygium syndrome, lethal type, 253290 (3)/Myasthenic syndrome, fast-channel congenital, 608930 (3)/Myasthenic syndrome, slow-channel congenital, 601462 (3)

CHRNA2 Epilepsy, nocturnal frontal lobe, type 4, 610353 (3)

CHRNA4 Epilepsy, nocturnal frontal lobe, 1, 600513 (3)/Nicotine addiction, susceptibility to, 188890 (3)

CHRNA7 Schizophrenia, neurophysiologic defect in (2)

CHRN1 Myasthenic syndrome, congenital, associated with acetylcholine receptor deficiency, 608931 (3)/Myasthenic syndrome, slow-channel congenital, 601462 (3)

CHRN2 Epilepsy, nocturnal frontal lobe, 3, 605375 (3)

CHRND Multiple pterygium syndrome, lethal type, 253290 (3)/Myasthenic syndrome, fast-channel congenital, 608930 (3)/Myasthenic syndrome, slow-channel congenital, 601462 (3)

CHRNE Myasthenic syndrome, congenital, associated with acetylcholine receptor deficiency, 608931 (3)/Myasthenic syndrome, fast-channel congenital, 608930 (3)/Myasthenic syndrome, slow-channel congenital, 601462 (3)

CHRNG Escobar syndrome, 265000 (3)/Multiple pterygium syndrome, lethal type, 253290 (3)/Myasthenia gravis, neonatal transient (2)

CHST14 Ehlers-Danlos syndrome, musculocontractural type 1, 601776 (3)

CHST3 Spondyloepiphyseal dysplasia with congenital joint dislocations, 143095 (3)

CHST6 Macular corneal dystrophy, 217800 (3)

CHSY1 Temtamy preaxial brachydactyly syndrome, 605282 (3)  
 CHUK Cocoon syndrome, 613630 (3)  
 CIB2 Deafness, autosomal recessive 48, 609439 (3)/Usher syndrome, type IJ, 614869 (3)  
 CIITA Bare lymphocyte syndrome, type II, complementation group A (3)  
 CIRH1A Cirrhosis, North American Indian childhood type, 604901 (3)  
 CISD2 Wolfram syndrome 2, 604928 (3)  
 CITED2 Atrial septal defect 8, 614433 (3)/Ventricular septal defect 2, 614431 (3)  
 CLCF1 Cold-induced sweating syndrome 2, 610313 (3)  
 CLCN1 Myotonia congenita, dominant, 160800 (3)/Myotonia congenita, recessive, 255700 (3)/Myotonia levior, recessive (3)  
 CLCN2 Leukoencephalopathy with ataxia, 615651 (3)/Epilepsy, idiopathic generalized, susceptibility to, 11, 607628 (3)/Epilepsy, juvenile absence, susceptibility to, 2, 607628 (3)/Epilepsy, juvenile myoclonic, susceptibility to, 8, 607628 (3)  
 CLCN4 Epileptic encephalopathy  
 CLCN5 Dent disease, 300009 (3)/Hypophosphatemic rickets, 300554 (3)/Nephrolithiasis, type I, 310468 (3)/Proteinuria, low molecular weight, with hypercalciuric nephrocalcinosis, 308990 (3)  
 CLCN7 Osteopetrosis, autosomal dominant 2, 166600 (3)/Osteopetrosis, autosomal recessive 4, 611490 (3)  
 CLCNKA Bartter syndrome, type 4b, digenic, 613090 (3)  
 CLCNKB Bartter syndrome, type 3, 607364 (3)/Bartter syndrome, type 4b, digenic, 613090 (3)  
 CLDN1 Ichthyosis, leukocyte vacuoles, alopecia, and sclerosing cholangitis, 607626 (3)  
 CLDN14 Deafness, autosomal recessive 29, 614035 (3)  
 CLDN16 Hypomagnesemia 3, renal, 248250 (3)  
 CLDN19 Hypomagnesemia 5, renal, with ocular involvement, 248190 (3)  
 CLEC7A Candidiasis, familial, 4, autosomal recessive, 613108 (3)/Aspergillosis, susceptibility to, 614079 (3)  
 CLIC2 Mental retardation, X-linked, syndromic 32, 300886 (3)  
 CLMP Congenital short bowel syndrome, 615237 (3)  
 CLN3 Ceroid lipofuscinosis, neuronal, 3, 204200 (3)  
 CLN5 Ceroid lipofuscinosis, neuronal, 5, 256731 (3)  
 CLN6 Ceroid lipofuscinosis, neuronal, 6, 601780 (3)/Ceroid lipofuscinosis, neuronal, Kufs type, adult onset, 204300 (3)  
 CLN8 Ceroid lipofuscinosis, neuronal, 8, 600143 (3)/Ceroid lipofuscinosis, neuronal, 8, Northern epilepsy variant, 610003 (3)  
 CLRN1 Retinitis pigmentosa 61, 614180 (3)/Usher syndrome, type 3A, 276902 (3)  
 CNBP Myotonic dystrophy  
 CNGA1 Retinitis pigmentosa 49, 613756 (3)  
 CNGA3 Achromatopsia-2, 216900 (3)  
 CNGB1 Retinitis pigmentosa 45, 613767 (3)  
 CNGB3 Achromatopsia-3, 262300 (3)/Macular degeneration, juvenile, 248200 (3)  
 CNKSR1 Intellectual disability  
 CNKSR2 Intellectual disability, X-linked non-syndromic  
 CNNM2 Hypomagnesemia 6, renal, 613882 (3)  
 CNNM4 Jalili syndrome, 217080 (3)  
 CNTN1 Myopathy, congenital, Compton-North, 612540 (3)  
 CNTNAP2 Cortical dysplasia-focal epilepsy syndrome, 610042 (3)/Pitt-Hopkins like syndrome 1, 610042 (3)/Autism susceptibility 15, 612100 (3)  
 COA5 Mitochondrial complex IV deficiency, 220110 (3)  
 COCH Deafness, autosomal dominant 9, 601369 (3)  
 COG1 Congenital disorder of glycosylation, type IIg, 611209 (3)  
 COG4 Congenital disorder of glycosylation, type IIj, 613489 (3)  
 COG5 Congenital disorder of glycosylation, type IIIi, 613612 (3)  
 COG6 Congenital disorder of glycosylation, type III, 614576 (3)/Shaheen syndrome, 615328 (3)  
 COG7 Congenital disorder of glycosylation, type IIe, 608779 (3)  
 COG8 Congenital disorder of glycosylation, type IIIh, 611182 (3)  
 COL10A1 Metaphyseal chondrodysplasia, Schmid type, 156500 (3)

COL11A1 Fibrochondrogenesis, 228520 (3)/Marshall syndrome, 154780 (3)/Stickler syndrome, type II, 604841 (3)/Lumbar disc herniation, susceptibility to, 603932 (3)

COL11A2 Deafness, autosomal dominant 13, 601868 (3)/Deafness, autosomal recessive 53, 609706 (3)/Fibrochondrogenesis 2, 614524 (3)/Otospondylomegapiphyseal dysplasia, 215150 (3)/Stickler syndrome, type III, 184840 (3)/Weissenbacher-Zweymuller syndrome, 277610 (3)

COL14A1 Keratoderma, palmoplantar, punctate

COL17A1 Epidermolysis bullosa, junctional, non-Herlitz type, 226650 (3)

COL18A1 Knobloch syndrome, type 1, 267750 (3)

COL1A1 Caffey disease, 114000 (3)/Ehlers-Danlos syndrome, type I, 130000 (3)/Ehlers-Danlos syndrome, type VIIA, 130060 (3)/OI type II, 166210 (3)/OI type III, 259420 (3)/OI type IV, 166220 (3)/Osteogenesis imperfecta, type I, 166200 (3)/[Bone mineral density variation QTL], 166710 (3)/Osteoporosis, 166710 (3)

COL1A2 Ehlers-Danlos syndrome, cardiac valvular form, 225320 (3)/Ehlers-Danlos syndrome, type VIIB, 130060 (3)/Osteogenesis imperfecta, type II, 166210 (3)/Osteogenesis imperfecta, type III, 259420 (3)/Osteogenesis imperfecta, type IV, 166220 (3)/Osteoporosis, postmenopausal, 166710 (3)

COL2A1 Achondrogenesis, type II or hypochondrogenesis, 200610 (3)/Avascular necrosis of the femoral head, 608805 (3)/Czech dysplasia, 609162 (3)/Epiphyseal dysplasia, multiple, with myopia and deafness, 132450 (3)/Kniest dysplasia, 156550 (3)/Legg-Calve-Perthes disease, 150600 (3)/Osteoarthritis with mild chondrodysplasia, 604864 (3)/Otospondylomegapiphyseal dysplasia, 215150 (3)/Platyspondylic skeletal dysplasia, Torrance type, 151210 (3)/SED congenita, 183900 (3)/SED, Namaqualand type (3)/SMED Strudwick type, 184250 (3)/Spondyloperipheral dysplasia, 271700 (3)/Stickler syndrome, type I, nonsyndromic ocular, 609508 (3)/Stickler syndrome, type I, 108300 (3)/Vitreo-retinopathy with phalangeal epiphyseal dysplasia (3)

COL3A1 Ehlers-Danlos syndrome, type III, 130020 (3)/Ehlers-Danlos syndrome, type IV, 130050 (3)

COL4A1 Angiopathy, hereditary, with nephropathy, aneurysms, and muscle cramps, 611773 (3)/Brain small vessel disease with or without ocular anomalies, 607595 (3)/Porencephaly 1, 175780 (3)/Hemorrhage, intracerebral, susceptibility to, 614519 (3)

COL4A2 Porencephaly 2, 614483 (3)/Hemorrhage, intracerebral, susceptibility to, 614519 (3)

COL4A3 Alport syndrome, autosomal dominant, 104200 (3)/Alport syndrome, autosomal recessive, 203780 (3)/Hematuria, benign familial, 141200 (3)

COL4A3BP Mental retardation, autosomal dominant 34, 616351 (3)

COL4A4 Alport syndrome, autosomal recessive, 203780 (3)/Hematuria, familial benign (3)

COL4A5 Alport syndrome, 301050 (3)

COL4A6 Deafness, X-linked 6, 300914 (3)

COL5A1 Ehlers-Danlos syndrome, type I, 130000 (3)/Ehlers-Danlos syndrome, type II, 130010 (3)

COL5A2 Ehlers-Danlos syndrome, type I, 130000 (3)

COL6A1 Bethlem myopathy, 158810 (3)/Ullrich congenital muscular dystrophy, 254090 (3)

COL6A2 Myosclerosis, congenital, 255600 (3)/Bethlem myopathy, 158810 (3)/Ullrich congenital muscular dystrophy, 254090 (3)

COL6A3 Bethlem myopathy, 158810 (3)/Ullrich congenital muscular dystrophy, 254090 (3)

COL7A1 EBD inversa, 226600 (3)/EBD, Bart type, 132000 (3)/EBD, localisata variant (3)/Epidermolysis bullosa dystrophica, AD, 131750 (3)/Epidermolysis bullosa dystrophica, AR, 226600 (3)/Epidermolysis bullosa pruriginosa, 604129 (3)/Epidermolysis bullosa, pretibial, 131850 (3)/Toenail dystrophy, isolated, 607523 (3)/Transient bullous of the newborn, 131705 (3)

COL8A2 Corneal dystrophy, Fuchs endothelial, 1, 136800 (3)/Corneal dystrophy, posterior polymorphous 2, 609140 (3)

COL9A1 Epiphyseal dysplasia, multiple, 6, 614135 (3)/Stickler syndrome, type IV, 614134 (3)

COL9A2 Stickler syndrome, type V, 614284 (3)/Epiphyseal dysplasia, multiple, 2, 600204 (3)/Intervertebral disc disease, susceptibility to, 603932 (3)

COL9A3 Epiphyseal dysplasia, multiple, 3, 600969 (3)/Epiphyseal dysplasia, multiple, with myopathy (3)/Intervertebral disc disease, susceptibility to, 603932 (3)

COLEC11 3MC syndrome 2, 265050 (3)

COLQ Endplate acetylcholinesterase deficiency, 603034 (3)

COMP Epiphyseal dysplasia, multiple 1, 132400 (3)/Pseudoachondroplasia, 177170 (3)

COMT Panic disorder, susceptibility to, 167870 (3)/Schizophrenia, susceptibility to, 181500 (3)

COPA {Autoimmune interstitial lung, joint, and kidney disease} 616414 (3)  
COQ2 Coenzyme Q10 deficiency, primary, 1, 607426 (3)/Multiple system atrophy, susceptibility to, 146500 (3)  
COQ5 Intellectual disability  
COQ6 Coenzyme Q10 deficiency, primary, 6, 614650 (3)  
COQ9 Coenzyme Q10 deficiency, primary, 5, 614654 (3)  
CORIN Preeclampsia/eclampsia 5, 614595 (3)  
CORO1A Immunodeficiency 8, 615401 (3)  
COX10 Leigh syndrome due to mitochondrial COX4 deficiency, 256000 (3)/Mitochondrial complex IV deficiency, 220110 (3)  
COX14 Lactic acidosis, fatal neonatal  
COX15 Cardioencephalomyopathy, fatal infantile, due to cytochrome c oxidase deficiency 2, 615119 (3)/Leigh syndrome due to cytochrome c oxidase deficiency, 256000 (3)  
COX4I2 Exocrine pancreatic insufficiency, dyserythropoietic anemia, and calvarial hyperostosis, 612714 (3)  
COX6B1 Mitochondrial complex IV deficiency, 220110 (3)  
COX7B Aplasia cutis congenita, reticuloliner, with mmicrocephaly, facial dysmorphism and other congenital anomalies, 300887 (3)  
CP Cerebellar ataxia, 604290 (3)/Hemosiderosis, systemic, due to aceruloplasminemia, 604290 (3)/[Hypoceruloplasminemia, hereditary], 604290 (3)  
CPA6 Epilepsy, familial temporal lobe, 5, 614417 (3)/Febrile seizures, familial, 11, 614418 (3)  
CPN1 Carboxypeptidase N deficiency, 212070 (3)  
CPOX Coproporphyrinuria, 121300 (3)/Harderoporphyria, 121300 (3)  
CPS1 Carbamoylphosphate synthetase I deficiency, 237300 (3)/Pulmonary hypertension, neonatal, susceptibility to, 615371 (3)/Venocclusive disease after bone marrow transplantation (3)  
CPT1A CPT deficiency, hepatic, type IA, 255120 (3)  
CPT2 CPT II deficiency, lethal neonatal, 608836 (3)/CPT deficiency, hepatic, type II, 600649 (3)/Myopathy due to CPT II deficiency, 255110 (3)/Encephalopathy, acute, infection-induced, 4, susceptibility to, 614212 (3)  
CR2 Immunodeficiency, common variable, 7, 614699 (3)/Systemic lupus erythematosus, susceptibility to, 9, 610927 (3)  
CRADD Mental retardation, autosomal recessive 34, 614499 (3)  
CRB1 Leber congenital amaurosis 8, 613835 (3)/Pigmented paravenous chorioretinal atrophy, 172870 (3)/Retinitis pigmentosa-12, autosomal recessive, 600105 (3)  
CRBN Mental retardation, autosomal recessive 2, 607417 (3)  
CREB1 Histiocytoma, angiomatoid fibrous, somatic, 612160 (3)  
CREBBP Rubinstein-Taybi syndrome, 180849 (3)  
CRELD1 Atrioventricular septal defect, partial, with heterotaxy syndrome, 606217 (3)/Atrioventricular septal defect, susceptibility to, 2, 606217 (3)  
CRH Nocturnal frontal lobe epilepsy, autosomal dominant  
CRLF1 Cold-induced sweating syndrome 1, 272430 (3)  
CRTAP Osteogenesis imperfecta, type VII, 610682 (3)  
CRX Cone-rod retinal dystrophy-2, 120970 (3)/Leber congenital amaurosis 7, 613829 (3)  
CRYAB Cardiomyopathy, dilated, 1II, 615184 (3)/Cataract 16, multiple types, 613763 (3)/Myopathy, myofibrillar, 2, 608810 (3)/Myopathy, myofibrillar, fatal infantile hypertrophy, alpha-B crystallin-related, 613869 (3)  
CRYBA1 Cataract 10, multiple types, 600881 (3)  
CRYBA4 Cataract 23, 610425 (3)  
CRYBB1 Cataract 17, multiple types, 611544 (3)  
CRYBB2 Cataract 3, multiple types, 601547 (3)  
CRYBB3 Cataract 22, autosomal recessive, 609741 (3)  
CRYGC Cataract 2, multiple types, 604307 (3)  
CRYGD Cataract 4, multiple types, 115700 (3)  
CSF1R Leukoencephalopathy, diffuse hereditary, with spheroids, 221820 (3)  
CSF2RA Surfactant metabolism dysfunction, pulmonary, 4, 300770 (3)  
CSF2RB Surfactant metabolism dysfunction, pulmonary, 5, 614370 (3)  
CSF3R Neutrophilia, hereditary, 162830 (3)  
CSRP3 Cardiomyopathy, dilated, 1M, 607482 (3)/Cardiomyopathy, familial hypertrophic, 12, 612124 (3)

CST3 Cerebral amyloid angiopathy, 105150 (3)/Macular degeneration, age-related, 11, 611953 (3)  
 CSTA Exfoliative ichthyosis, autosomal recessive, ichthyosis bullosa of Siemens-like, 607936 (3)  
 CSTB Epilepsy, progressive myoclonic 1A (Unverricht and Lundborg), 254800 (3)  
 CTC1 Cerebroretinal microangiopathy with calcifications and cysts, 612199 (3)  
 CTDP1 Congenital cataracts, facial dysmorphism, and neuropathy, 604168 (3)  
 CTH Cystathioninuria, 219500 (3)/Homocysteine, total plasma, elevated (3)  
 CTHRC1 Barrett esophagus/esophageal adenocarcinoma, 614266 (3)  
 CTLA4 Autoimmune lymphoproliferative syndrome, type V, 616100 (3)  
 CTNNB1 Colorectal cancer, somatic, 114500 (3)/Hepatocellular carcinoma, somatic, 114550 (3)/Mental retardation, autosomal dominant 19, 615075 (3)/Ovarian cancer, somatic, 167000 (3)/Pilomatricoma, somatic, 132600  
 CTNS Cystinosis, atypical nephropathic, 219800 (3)/Cystinosis, late-onset juvenile or adolescent nephropathic, 219900 (3)/Cystinosis, nephropathic, 219800 (3)/Cystinosis, ocular nonnephropathic, 219750 (3)  
 CTSA Galactosialidosis, 256540 (3)  
 CTSC Haim-Munk syndrome, 245010 (3)/Papillon-Lefevre syndrome, 245000 (3)/Periodontitis 1, juvenile, 170650 (3)  
 CTSD Ceroid lipofuscinosis, neuronal, 10, 610127 (3)  
 CTSK Pycnodysostosis, 265800 (3)  
 CUBN Megaloblastic anemia-1, Finnish type, 261100 (3)  
 CUL3 Pseudohypoaldosteronism, type IIE, 614496 (3)  
 CUL4B Mental retardation, X-linked, syndromic 15 (Cabezas type), 300354 (3)  
 CUL7 3-M syndrome 1, 273750 (3)  
 CXCR4 Myelokathexis, isolated (3)/WHIM syndrome, 193670 (3)  
 CYB5A Methemoglobinemia, type IV, 250790 (3)  
 CYB5R3 Methemoglobinemia, type I, 250800 (3)/Methemoglobinemia, type II, 250800 (3)  
 CYBA Chronic granulomatous disease, autosomal, due to deficiency of CYBA, 233690 (3)  
 CYBB Chronic granulomatous disease, X-linked, 306400 (3)/Immunodeficiency 34, mycobacteriosis, X-linked, 300645 (3)  
 CYCS Thrombocytopenia 4, 612004 (3)  
 CYLD Brooke-Spiegler syndrome, 605041 (3)/Cylindromatosis, familial, 132700 (3)/Trichoepithelioma, multiple familial, 1, 601606 (3)  
 CYP11A1 Adrenal insufficiency, congenital, with 46XY sex reversal, partial or complete, 613743 (3)  
 CYP11B1 Adrenal hyperplasia, congenital, due to 11-beta-hydroxylase deficiency, 202010 (3)/Aldosteronism, glucocorticoid-remediable, 103900 (3)  
 CYP11B2 Aldosterone to renin ratio raised (3)/Hypoaldosteronism, congenital, due to CMO I deficiency, 203400 (3)/Hypoaldosteronism, congenital, due to CMO II deficiency, 610600 (3)/Low renin hypertension, susceptibility to (3)  
 CYP17A1 17,20-lyase deficiency, isolated, 202110 (3)/17-alpha-hydroxylase/17,20-lyase deficiency, 202110 (3)  
 CYP19A1 Aromatase deficiency, 613546 (3)/Aromatase excess syndrome, 139300 (3)  
 CYP1B1 Glaucoma 3A, primary open angle, congenital, juvenile, or adult onset, 231300 (3)/Peters anomaly, 604229 (3)  
 CYP21A1P Adrenal hyperplasia, congenital, due to 21-hydroxylase deficiency 201910 (3)/Hyperandrogenism, nonclassic type, due to 21-hydroxylase deficiency 201910 (3)  
 CYP21A2 Adrenal hyperplasia, congenital, due to 21-hydroxylase deficiency, 201910 (3)/Hyperandrogenism, nonclassic type, due to 21-hydroxylase deficiency, 201910 (3)  
 CYP24A1 Hypercalcemia, infantile, 143880 (3)  
 CYP26B1 Craniosynostosis with radiohumeral fusions and other skeletal and craniofacial anomalies, 614416 (3)  
 CYP27A1 Cerebrotendinous xanthomatosis, 213700 (3)  
 CYP27B1 Vitamin D-dependent rickets, type I, 264700 (3)  
 CYP2A6 Coumarin resistance, 122700 (3)/Lung cancer, resistance to, 211980 (3)/Nicotine addiction, protection from, 188890 (3)  
 CYP2B6 Efavirenz, poor metabolism of, 614546 (3)/Efavirenz central nervous system toxicity, susceptibility to, 614546 (3)  
 CYP2C19 Clopidogrel, impaired responsiveness to, 609535 (3)/Mephenytoin poor metabolizer, 609535 (3)/Omeprazole poor metabolizer, 609535 (3)/Proguanil poor metabolizer, 609535 (3)

CYP2C9 Tolbutamide poor metabolizer (3)/Warfarin sensitivity, 122700 (3)  
 CYP2D6 Codeine sensitivity, 608902 (3)/Debrisoquine sensitivity, 608902 (3)  
 CYP2R1 Rickets due to defect in vitamin D 25-hydroxylation, 600081 (3)  
 CYP4F22 Ichthyosis, congenital, autosomal recessive 5, 604777 (3)  
 CYP4V2 Bietti crystalline corneoretinal dystrophy, 210370 (3)  
 CYP7B1 Bile acid synthesis defect, congenital, 3, 613812 (3)/Spastic paraplegia 5A, autosomal recessive, 270800 (3)  
 D2HGDH D-2-hydroxyglutaric aciduria, 600721 (3)  
 DACT1 Neural tube defects  
 DAG1 Muscular dystrophy-dystroglycanopathy (limb-girdle), type C, 9, 613818 (3)  
 DARS2 Leukoencephalopathy with brain stem and spinal cord involvement and lactate elevation, 611105 (3)  
 DAZ1 Oligozoospermia  
 DBH Dopamine beta-hydroxylase deficiency, 223360 (3)/[Dopamine-beta-hydroxylase activity levels, plasma] (3)  
 DBT Maple syrup urine disease, type II, 248600 (3)  
 DCAF17 Woodhouse-Sakati syndrome, 241080 (3)  
 DCC Colorectal cancer, somatic, 114500 (3)/Esophageal carcinoma, somatic 133239 (3)/Mirror movements 1, 157600 (3)  
 DCLRE1C Omenn syndrome, 603554 (3)/Severe combined immunodeficiency, Athabaskan type, 602450 (3)  
 DCN Corneal dystrophy, congenital stromal, 610048 (3)  
 DCR Down syndrome (4)  
 DCTN1 Neuropathy, distal hereditary motor, type VIIB, 607641 (3)/Perry syndrome, 168605 (3)/Amyotrophic lateral sclerosis, susceptibility to, 105400 (3)  
 DCX Lissencephaly, X-linked, 300067 (3)/Subcortical laminar heteropia, X-linked, 300067 (3)  
 DCXR [Pentosuria] 260800 (3)  
 DDB2 Xeroderma pigmentosum, group E, DDB-negative subtype, 278740 (3)  
 DDC Aromatic L-amino acid decarboxylase deficiency, 608643 (3)  
 DDHD1 Spastic paraplegia 28, autosomal recessive, 609340 (3)  
 DDIT3 Myxoid liposarcoma, 613488 (1)  
 DDOST Congenital disorder of glycosylation, type I<sub>r</sub>, 614507 (3)  
 DDR2 Spondylometaphyseal dysplasia, short limb-hand type, 271665 (3)  
 DDX11 Warsaw breakage syndrome, 613398 (3)  
 DEAF1 Mental retardation, autosomal dominant 24, 615828 (3)  
 DEC1 Esophageal squamous cell carcinoma 133239 (1)  
 DES Muscular dystrophy, limb-girdle, type 2R, 615325 (3)/Cardiomyopathy, dilated, 1I, 604765 (3)/Myopathy, myofibrillar, 1, 601419 (3)/Scapuloperoneal syndrome, neurogenic, Kaeser type, 181400 (3)  
 DFNA5 Deafness, autosomal dominant 5, 600994 (3)  
 DFNB31 Deafness, non-syndromic  
 DFNB59 Progressive hearing loss, autosomal recessive  
 DGCR DiGeorge syndrome 188400 (3)  
 DGKE Nephrotic syndrome, type 7, 615008 (3)  
 DGUOK Mitochondrial DNA depletion syndrome 3 (hepatocerebral type), 251880 (3)  
 DHCR24 Desmosterolosis, 602398 (3)  
 DHCR7 Smith-Lemli-Opitz syndrome, 270400 (3)  
 DHDDS Retinitis pigmentosa 59, 613861 (3)  
 DHFR Megaloblastic anemia due to dihydrofolate reductase deficiency, 613839 (3)  
 DHH 46XY partial gonadal dysgenesis, with minifascicular neuropathy, 607080 (3)/46XY sex reversal 7, 233420 (3)  
 DHODH Miller syndrome, 263750 (3)  
 DHTKD1 2-aminoadipic 2-oxoadipic aciduria, 204750 (3)/  
 DIABLO Progressive hearing loss  
 DIAPH1 Deafness, autosomal dominant 1, 124900 (3)  
 DIAPH2 Premature ovarian failure, 300511 (3)  
 DIAPH3 Auditory neuropathy, autosomal dominant, 1, 609129 (3)  
 DICER1 Goiter, multinodular 1, with or without Sertoli-Leydig cell tumors, 138800 (3)/Pleuropulmonary blastoma, 601200 (3)/Rhabdomyosarcoma, embryonal, 2, 180295 (3)



DIP2B Mental retardation, FRA12A type, 136630 (3)  
DIRC2 Renal cell carcinoma, 144700 (2)  
DIS3L2 Perlman syndrome, 267000 (3)  
DISP1 Craniofacial and neuro-developmental abnormalities  
DKC1 Dyskeratosis congenita, X-linked, 305000 (3)  
DLAT Pyruvate dehydrogenase E2 deficiency, 245348 (3)  
DLD Dihydrolipoamide dehydrogenase deficiency, 246900 (3)  
DLEC1 Esophageal cancer, 133239 (1)/Lung cancer, 211980 (1)  
DLG3 Mental retardation, X-linked 90, 300850 (3)  
DLL3 Spondylocostal dysostosis 1, autosomal recessive, 277300 (3)  
DLX3 Amelogenesis imperfecta, type IV, 104510 (3)/Trichodontoosseous syndrome, 190320 (3)  
DLX5 Split-hand/foot malformation 1 with sensorineural hearing loss, 220600 (3)  
DMD Becker muscular dystrophy, 300376 (3)/Cardiomyopathy, dilated, 3B, 302045 (3)/Duchenne muscular dystrophy, 310200 (3)  
DMGDH Dimethylglycine dehydrogenase deficiency, 605850 (3)  
DMP1 Hypophosphatemic rickets, AR, 241520 (3)  
DMPK Myotonic dystrophy 1, 160900 (3)  
DMRT1 XY gonadal dysgenesis  
DNAAF1 Primary ciliary dyskinesia  
DNAAF2 Ciliary dyskinesia, primary  
DNAAF3 Ciliary dyskinesia, primary, 2, 606763 (3)  
DNAH11 Ciliary dyskinesia, primary, 7, with or without situs inversus, 611884 (3)  
DNAH5 Ciliary dyskinesia, primary, 3, with or without situs inversus, 608644 (3)  
DNAI1 Ciliary dyskinesia, primary, 1, with or without situs inversus, 244400 (3)  
DNAI2 Ciliary dyskinesia, primary, 9, with or without situs inversus, 612444 (3)  
DNAJB2 Charcot-Marie-Tooth disease, axonal, type 2T, 616233 (3)/Spinal muscular atrophy, distal, autosomal recessive, 5, 614881 (3)  
DNAJB6 Muscular dystrophy, limb-girdle, type 1E, 603511 (3)  
DNAJC19 3-methylglutaconic aciduria, type V, 610198 (3)  
DNAJC5 Ceroid lipofuscinosis, neuronal, 4, Parry type, 162350 (3)  
DNAL1 Ciliary dyskinesia, primary, 16, 614017 (3)  
DNASE1L3 Systemic lupus erythematosus 16, 614420 (3)  
DNM1L Encephalopathy, lethal, due to defective mitochondrial peroxisomal fission, 614388 (3)  
DNM2 Charcot-Marie-Tooth disease, axonal, type 2M, 606482 (3)/Charcot-Marie-Tooth disease, dominant intermediate B, 606482 (3)/Lethal congenital contracture syndrome 5, 615368 (3)/Myopathy, centronuclear, 160150 (3)  
DNMT1 Cerebellar ataxia, deafness, and narcolepsy, autosomal dominant, 604121 (3)/Neuropathy, hereditary sensory, type IE, 614116 (3)  
DNMT3B Immunodeficiency-centromeric instability-facial anomalies syndrome 1, 242860 (3)  
DOCK6 Adams-Oliver syndrome 2, 614219 (3)  
DOCK8 Hyper-IgE recurrent infection syndrome, autosomal recessive, 243700 (3)/Mental retardation, autosomal dominant 2, 614113 (3)  
DOK7 Fetal akinesia deformation sequence, 208150 (3)/Myasthenia, limb-girdle, familial, 254300 (3)  
DOLK Dolichol kinase deficiency  
DPAGT1 Congenital disorder of glycosylation, type Ij, 608093 (3)/Myasthenic syndrome, congenital, with tubular aggregates 2, 614750 (3)  
DPM1 Congenital disorder of glycosylation, type Ie, 608799 (3)  
DPM2 Congenital disorder of glycosylation, type Iu, 615042 (3)  
DPM3 Congenital disorder of glycosylation, type Io, 612937 (3)  
DPP6 Ventricular fibrillation, paroxysmal familial, 2, 612956 (3)  
DPYD 5-fluorouracil toxicity, 274270 (3)/Dihydropyrimidine dehydrogenase deficiency, 274270 (3)  
DPYS Dihydropyrimidinuria, 222748 (3)  
DRD2 Dystonia, myoclonic, 159900 (3)

DSC2 Arrhythmogenic right ventricular dysplasia 11 with mild palmoplantar keratoderma and woolly hair, 610476 (3)/Arrhythmogenic right ventricular dysplasia 11, 610476 (3)

DSC3 ?Hypotrichosis and recurrent skin vesicles, 613102 (3)

DSG1 Erythroderma, congenital, with palmoplantar keratoderma, hypotrichosis, and hyper IgE, 615508 (3)/Keratosis palmoplantaris striata I, AD, 148700 (3)

DSG2 Arrhythmogenic right ventricular dysplasia 10, 610193 (3)/Cardiomyopathy, dilated, 1BB, 612877 (3)

DSG4 Hypotrichosis 6, 607903 (3)

DSP Arrhythmogenic right ventricular dysplasia 8, 607450 (3)/Cardiomyopathy, dilated, with woolly hair and keratoderma, 605676 (3)/Dilated cardiomyopathy with woolly hair, keratoderma, and tooth agenesis, 615821 (3)/Epidermolysis bullosa, lethal acantholytic, 609638 (3)/Keratosis palmoplantaris striata II, 612908 (3)/Skin fragility-woolly hair syndrome, 607655 (3)

DSPP Deafness, autosomal dominant 36, with dentinogenesis, 605594 (3)/Dentin dysplasia, type II, 125420 (3)/Dentinogenesis imperfecta, Shields type II, 125490 (3)/Dentinogenesis imperfecta, Shields type III, 125500 (3)

DST Neuropathy, hereditary sensory and autonomic, type VI, 614653 (3)/Epidermolysis bullosa simplex, autosomal recessive 2, 615425 (3)

DTNA Left ventricular noncompaction 1, with or without congenital heart defects, 604169 (3)

DTNBP1 Hermansky-Pudlak syndrome 7, 614076 (3)/Schizophrenia, 181500 (2)

DUOX2 Thyroid dysmorphogenesis 6, 607200 (3)

DUOXA2 Thyroid dysmorphogenesis 5, 274900 (3)

DUX4 Facioscapulohumeral muscular dystrophy

DYM Dyggve-Melchior-Clausen disease, 223800 (3)/Smith-McCort dysplasia, 607326 (3)

DYNC1H1 Charcot-Marie-Tooth disease, axonal, type 20, 614228 (3)/Mental retardation, autosomal dominant 13, 614563 (3)/Spinal muscular atrophy, lower extremity-predominant 1, AD, 158600 (3)

DYNC2H1 Short-rib thoracic dysplasia 3 with or without polydactyly, 613091 (3)

DYRK1A Mental retardation, autosomal dominant 7, 614104 (3)

DYSF Miyoshi muscular dystrophy 1, 254130 (3)/Muscular dystrophy, limb-girdle, type 2B, 253601 (3)/Myopathy, distal, with anterior tibial onset, 606768 (3)

EARS2 Combined oxidative phosphorylation deficiency 12, 614924 (3)

EBP Chondrodysplasia punctata, X-linked dominant, 302960 (3)

ECE1 Hirschsprung disease, cardiac defects, and autonomic dysfunction, 613870 (3)/Hypertension, essential, susceptibility to, 145500 (3)

ECM1 Urbach-Wiethe disease, 247100 (3)

EDA Ectodermal dysplasia

EDAR Ectodermal dysplasia 10A, hypohidrotic/hair/nail type, autosomal dominant, 129490 (3)/Ectodermal dysplasia 10B, hypohidrotic/hair/tooth type, autosomal recessive, 224900 (3)/[Hair morphology 1, hair thickness], 612630 (3)

EDARADD Ectodermal dysplasia 11A, hypohidrotic/hair/tooth type, autosomal dominant, 614940 (3)/Ectodermal dysplasia 11B, hypohidrotic/hair/tooth type, autosomal recessive, 614941 (3)

EDN3 Central hypoventilation syndrome, congenital, 209880 (3)/Waardenburg syndrome, type 4B, 613265 (3)/Hirschsprung disease, susceptibility to, 4, 613712 (3)

EDNRA Migraine, resistance to, 157300 (3)

EDNRB ABCD syndrome, 600501 (3)/Waardenburg syndrome, type 4A, 277580 (3)/Hirschsprung disease, susceptibility to, 2, 600155 (3)

EEF1A2 Epileptic encephalopathy, early infantile, 33 616409/Mental retardation, autosomal dominant 38 616393 (3)

EEF1B2 Intellectual disability

EFEMP1 Doyme honeycomb degeneration of retina, 126600 (3)

EFEMP2 Cutis laxa, autosomal recessive, type IB, 614437 (3)

EFHC1 Epilepsy, juvenile absence, susceptibility to, 1, 607631 (3)/Myoclonic epilepsy, juvenile, susceptibility to, 1, 254770 (3)

EFNB1 Craniofrontonasal dysplasia, 304110 (3)

EFTUD2 Mandibulofacial dysostosis, Guion-Almeida type, 610536 (3)

EGF Hypomagnesemia 4, renal, 611718 (3)

EGFR Inflammatory skin and bowel disease, neonatal, 2, 616069 (3)/Adenocarcinoma of lung, response to tyrosine kinase inhibitor in, 211980 (3)/Non-small cell lung cancer, response to tyrosine kinase inhibitor in, 211980 (3)/Non-small cell lung cancer, susceptibility to, 211980 (3)

EGLN1 Erythrocytosis, familial, 3, 609820 (3)/[Hemoglobin, high altitude adaptation], 609070 (3)

EGR2 Charcot-Marie-Tooth disease, type 1D, 607678 (3)/Dejerine-Sottas disease, 145900 (3)/Neuropathy, congenital hypomyelinating, 1, 605253 (3)

EHMT1 Kleefstra syndrome, 610253 (3)

EIF2AK3 Wolcott-Rallison syndrome, 226980 (3)

EIF2B1 Leukoencephalopathy with vanishing white matter, 603896 (3)

EIF2B2 Leukoencephalopathy with vanishing white matter, 603896 (3)/Ovarioleukodystrophy, 603896 (3)

EIF2B3 Leukoencephalopathy with vanishing white matter, 603896 (3)

EIF2B4 Leukoencephalopathy with vanishing white matter, 603896 (3)/Ovarioleukodystrophy, 603896 (3)

EIF2B5 Leukoencephalopathy with vanishing white matter, 603896 (3)/Ovarioleukodystrophy, 603896 (3)

EIF2S3 Intellectual disability

EIF4G1 Parkinson disease 18, 614251 (3)

ELANE Neutropenia, cyclic, 162800 (3)/Neutropenia, severe congenital 1, autosomal dominant, 202700 (3)

ELK1 Mental retardation, X-linked

ELN Cutis laxa, AD, 123700 (3)/Supravalvular aortic stenosis, 185500 (3)

ELOVL4 Spinocerebellar ataxia 34, 133190 (3)/Ichthyosis, spastic quadriplegia, and mental retardation, 614457 (3)/Stargardt disease 3, 600110 (3)

ELP2 Intellectual disability

EMD Emery-Dreifuss muscular dystrophy 1, X-linked, 310300 (3)

EMG1 Bowen-Conradi syndrome, 211180 (3)

EMX2 Schizencephaly, 269160 (3)

ENAM Amelogenesis imperfecta, type IB, 104500 (3)/Amelogenesis imperfecta, type IC, 204650 (3)

ENG Telangiectasia, hereditary hemorrhagic, type 1, 187300 (3)

ENO3 Glycogen storage disease XIII, 612932 (3)

ENPP1 Arterial calcification, generalized, of infancy, 1, 208000 (3)/Cole disease, 615522 (3)/Hypophosphatemic rickets, autosomal recessive, 2, 613312 (3)/Diabetes mellitus, non-insulin-dependent, susceptibility to, 125853 (3)/Obesity, susceptibility to, 601665 (3)

ENTPD1 Spastic paraplegia 64, 615683 (3)

EP300 Colorectal cancer, somatic, 114500 (3)/Rubinstein-Taybi syndrome 2, 613684 (3)

EPAS1 Erythrocytosis, familial, 4, 611783 (3)

EPB41 Elliptocytosis-1, 611804 (3)

EPB41L1 Mental retardation, autosomal dominant 11, 614257 (3)

EPB42 Spherocytosis, hereditary, type 5, 612690 (3)

EPCAM Colorectal cancer, hereditary nonpolyposis, type 8, 613244 (3)/Diarrhea 5, with tufting enteropathy, congenital, 613217 (3)

EPHA2 Cataract 6, multiple types, 116600 (3)

EPHB2 Prostate cancer/brain cancer susceptibility, somatic, 603688 (3)

EPHX1 Fetal hydantoin syndrome (1)/Diphenylhydantoin toxicity (1)/Hypercholanemia, familial, 607748 (3)/Preeclampsia, susceptibility to, 189800 (3)

EPHX2 Hypercholesterolemia, familial, due to LDLR defect, modifier of, 143890 (3)

EPM2A Epilepsy, progressive myoclonic 2A (Lafora), 254780 (3)

EPX Eosinophil peroxidase deficiency, 261500 (3)

ERBB2 Adenocarcinoma of lung, somatic, 211980 (3)/Gastric cancer, somatic, 613659 (3)/Glioblastoma, somatic, 137800 (3)/Ovarian cancer, somatic, (3)

ERBB3 Lethal congenital contractural syndrome 2, 607598 (3)

ERCC1 Cerebrooculofacioskeletal syndrome 4, 610758 (3)

ERCC2 Cerebrooculofacioskeletal syndrome 2, 610756 (3)/Trichothiodystrophy, 601675 (3)/Xeroderma pigmentosum, group D, 278730 (3)

ERCC3 Trichothiodystrophy, 601675 (3)/Xeroderma pigmentosum, group B, 610651 (3)

ERCC4 Fanconi anemia, complementation group Q, 615272 (3)/XFE progeroid syndrome, 610965 (3)/Xeroderma pigmentosum, group F, 278760 (3)/Xeroderma pigmentosum, type F/Cockayne syndrome, 278760 (3)

ERCC5 Xeroderma pigmentosum, group G, 278780 (3)/Xeroderma pigmentosum, group G/Cockayne syndrome, 278780 (3)  
 ERCC6 Cerebrooculofacioskeletal syndrome 1, 214150 (3)/Cockayne syndrome, type B, 133540 (3)/De Sanctis-Cacchione syndrome, 278800 (3)/UV-sensitive syndrome 1, 600630 (3)/Lung cancer, susceptibility to, 211980 (3)/Macular degeneration, age-related, susceptibility to 5, 613761 (3)  
 ERCC8 Cockayne syndrome, type A, 216400 (3)/UV-sensitive syndrome 2, 614621 (3)  
 ERLIN2 Spastic paraplegia 18, autosomal recessive, 611225 (3)  
 ERMAP [Blood group, Radin], 111620 (3)/[Blood group, Scianna system], 111750 (3)  
 ESCO2 Roberts syndrome, 268300 (3)/SC phocomelia syndrome, 269000 (3)  
 ESPN Deafness, autosomal recessive 36, 609006 (3)/Deafness, neurosensory, without vestibular involvement, autosomal dominant (3)  
 ESRRB Deafness, autosomal recessive 35, 608565 (3)  
 ETFA Glutaric acidemia IIA, 231680 (3)  
 ETFB Glutaric acidemia IIB, 231680 (3)  
 ETFDH Glutaric acidemia IIC, 231680 (3)  
 ETHE1 Ethylmalonic encephalopathy, 602473 (3)  
 ETV6 Leukemia, acute myeloid, somatic, 601626 (3)/Thrombocytopenia 5, 616216 (3)  
 EVC Ellis-van Creveld syndrome, 225500 (3)/Weyers acrofacial dysostosis, 193530 (3)  
 EVC2 Weyers acrofacial dysostosis  
 EWSR1 Ewing sarcoma, 612219 (3)/Neuroepithelioma, 612219 (3)  
 EXOSC3 Pontocerebellar hypoplasia, type 1B, 614678 (3)  
 EXT1 Chondrosarcoma, 215300 (3)/Exostoses, multiple, type 1, 133700 (3)  
 EXT2 Exostoses, multiple, type 2, 133701 (3)  
 EYA1 Otofaciocervical syndrome, 166780 (3)/Anterior segment anomalies with or without cataract, 113650 (3)/Branchiootic syndrome 1, 602588 (3)/Branchiootorenal syndrome 1, with or without cataracts, 113650 (3)  
 EYA4 Cardiomyopathy, dilated, 1J, 605362 (3)/Deafness, autosomal dominant 10, 601316 (3)  
 EYS Retinitis pigmentosa 25, 602772 (3)  
 EZH2 Weaver syndrome, 277590 (3)  
 F10 Factor X deficiency, 227600 (3)  
 F11 Factor XI deficiency, autosomal dominant, 612416 (3)/Factor XI deficiency, autosomal recessive, 612416 (3)  
 F11-AS1 Factor XI deficiency, autosomal dominant 612416 (3)/ Factor XI deficiency, autosomal recessive 612416 (3)  
 F12 Angioedema, hereditary, type III, 610618 (3)/Factor XII deficiency, 234000 (3)  
 F13A1 Factor XIII A deficiency, 613225 (3)/Myocardial infarction, protection against, 608446 (3)/Venous thrombosis, protection against, 188050 (3)  
 F13B Factor XIII B deficiency, 613235 (3)  
 F2 Dysprothrombinemia, 613679 (3)/Hypoprothrombinemia, 613679 (3)/Thrombophilia due to thrombin defect, 188050 (3)/Pregnancy loss, recurrent, susceptibility to, 2, 614390 (3)/Stroke, ischemic, susceptibility to, 601367 (3)  
 F5 Factor V deficiency, 227400 (3)/Thrombophilia due to activated protein C resistance, 188055 (3)/Budd-Chiari syndrome, 600880 (3)/Pregnancy loss, recurrent, susceptibility to, 1, 614389 (3)/Stroke, ischemic, susceptibility to, 601367 (3)/Thrombophilia, susceptibility to, due to factor V Leiden, 188055 (3)  
 F7 Factor VII deficiency, 227500 (3)/Myocardial infarction, decreased susceptibility to, 608446 (3)  
 F8 Hemophilia A, 306700 (3)  
 F9 Hemophilia B, 306900 (3)/Thrombophilia, X-linked, due to factor IX defect, 300807 (3)/Deep venous thrombosis, protection against, 300807 (3)/Warfarin sensitivity, 122700 (3)  
 FA2H Spastic paraplegia 35, autosomal recessive, 612319 (3)  
 FADD Infections, recurrent, with encephalopathy, hepatic dysfunction, and cardiovascular malformations, 613759 (3)  
 FAH Tyrosinemia, type I, 276700 (3)  
 FAM126A Leukodystrophy, hypomyelinating, 5, 610532 (3)  
 FAM134B Neuropathy, hereditary sensory and autonomic, type IIB, 613115 (3)  
 FAM161A Retinitis pigmentosa 28, 606068 (3)  
 FAM20A Amelogenesis imperfecta, type IG (enamel-renal syndrome), 204690 (3)

FAM20C Raine syndrome, 259775 (3)

FAM58A STAR syndrome, 300707 (3)

FAM83H Amelogenesis imperfecta, type III, 130900 (3)

FAN1 Interstitial nephritis, karyomegalic, 614817 (3)

FANCA Fanconi anemia, complementation group A, 227650 (3)

FANCB VACTERL with Fanconi anaemia

FANCC Fanconi anemia, complementation group C, 227645 (3)

FANCD2 Fanconi anemia, complementation group D2, 227646 (3)

FANCE Fanconi anemia, complementation group E, 600901 (3)

FANCF Fanconi anemia, complementation group F, 603467 (3)

FANCG Fanconi anaemia

FANCI Fanconi anemia, complementation group I, 609053 (3)

FANCL Fanconi anaemia

FANCM Fanconi anemia, complementation group M, 614087 (3)

FARS2 Combined oxidative phosphorylation deficiency 14, 614946 (3)

FAS Autoimmune lymphoproliferative syndrome, type IA, 601859 (3)/Squamous cell carcinoma, burn scar-related, somatic (3)/Autoimmune lymphoproliferative syndrome, 601859 (3)

FASLG Autoimmune lymphoproliferative syndrome, type IB, 601859 (3)/Lung cancer, susceptibility to, 211980 (3)

FASN Intellectual disability

FASTKD2 Mitochondrial complex IV deficiency, 220110 (3)

FBLN1 Synpolydactyly, 3/3'4, associated with metacarpal and metatarsal synostoses, 608180 (4)

FBLN5 Cutis laxa, autosomal dominant 2, 614434 (3)/Cutis laxa, autosomal recessive, type IA, 219100 (3)/Macular degeneration, age-related, 3, 608895 (3)

FBN1 Acromicric dysplasia, 102370 (3)/Aortic aneurysm, ascending, and dissection (3)/Ectopia lentis, familial, 129600 (3)/Geleophysic dysplasia 2, 614185 (3)/MASS syndrome, 604308 (3)/Marfan syndrome, 154700 (3)/Stiff skin syndrome, 184900 (3)/Weill-Marchesani syndrome 2, dominant, 608328 (3)

FBN2 Contractural arachnodactyly, congenital, 121050 (3)/Macular degeneration, early-onset, 616118 (3)

FBP1 Fructose-1,6-bisphosphatase deficiency, 229700 (3)

FBXO7 Parkinson disease 15, autosomal recessive, 260300 (3)

FBXW4 Split hand/foot malformation 3

FCGR2C Thrombocytopenic purpura, autoimmune, 188030 (1)

FCN3 Immunodeficiency due to ficolin 3 deficiency, 613860 (3)

FECH Protoporphyrin, erythropoietic, autosomal recessive, 177000 (3)

FERMT1 Kindler syndrome

FERMT3 Integrin activation deficiency disease

FGA Afibrinogenemia, congenital, 202400 (3)/Amyloidosis, familial visceral, 105200 (3)/Dysfibrinogenemia, congenital, 616004 (3)/Hypodysfibrinogenemia, congenital, 616004 (3)

FGB Afibrinogenemia, congenital, 202400 (3)/Dysfibrinogenemia, congenital, 616004 (3)/Hypofibrinogenemia, congenital, 202400 (3)

FGD1 Aarskog-Scott syndrome, 305400 (3)/Mental retardation, X-linked syndromic 16, 305400 (3)

FGD4 Charcot-Marie-Tooth disease, type 4H, 609311 (3)

FGF10 Aplasia of lacrimal and salivary glands, 180920 (3)/LADD syndrome, 149730 (3)

FGF14 Spinocerebellar ataxia 27, 609307 (3)

FGF23 Hypophosphatemic rickets, autosomal dominant, 193100 (3)/Osteomalacia, tumor-induced (1)/Tumoral calcinosis, hyperphosphatemic, familial, 211900 (3)

FGF3 Deafness, congenital with inner ear agenesis, microtia, and microdontia, 610706 (3)

FGF8 Hypogonadotropic hypogonadism 6 with or without anosmia, 612702 (3)

FGF9 Multiple synostoses syndrome 3, 612961 (3)

FGFR1 Hartsfield syndrome, 615465 (3)/Hypogonadotropic hypogonadism 2 with or without anosmia, 147950 (3)/Jackson-Weiss syndrome, 123150 (3)/Osteoglyphonic dysplasia, 166250 (3)/Pfeiffer syndrome, 101600 (3)/Trigonocephaly 1, 190440 (3)

Antley-Bixler syndrome without genital anomalies or disordered steroidogenesis, 207410 (3)/Apert syndrome, 101200 (3)/Beare-Stevenson cutis gyrata syndrome, 123790 (3)/Bent bone dysplasia syndrome, 614592 (3)/Craniofacial-skeletal-dermatologic dysplasia, 101600 (3)/Craniosynostosis, nonspecific (3)/Crouzon syndrome, 123500 (3)/Gastric cancer, somatic, 613659 (3)/Jackson-Weiss syndrome, 123150 (3)/LADD syndrome, 149730 (3)/Pfeiffer syndrome, 101600 (3)/Saethre-Chotzen syndrome, 101400 (3)/Scaphocephaly and Axenfeld-Rieger anomaly (3)/Scaphocephaly, maxillary retrusion, and mental retardation, 609579 (3)

Achondroplasia, 100800 (3)/Bladder cancer, somatic, 109800 (3)/CATSHL syndrome, 610474 (3)/Cervical cancer, somatic, 603956 (3)/Colorectal cancer, somatic, 114500 (3)/Crouzon syndrome with acanthosis nigricans, 612247 (3)/Hypochondroplasia, 146000 (3)/LADD syndrome, 149730 (3)/Muenke syndrome, 602849 (3)/Nevus, epidermal, somatic, 162900 (3)/Spermatocytic seminoma, somatic, 273300 (3)/Thanatophoric dysplasia, type I, 187600 (3)/Thanatophoric dysplasia, type II, 187601 (3)

Fumarate deficiency, 606812 (3)/Leiomyomatosis and renal cell cancer, 150800 (3)

Emery-Dreifuss muscular dystrophy 6, X-linked, 300696 (3)/Hemophagocytic lymphohistiocytosis, familial, 1 (2)/Myopathy, X-linked, with postural muscle atrophy, 300696 (3)/Myopathy, reducing body, X-linked, childhood-onset, 300718 (3)/Myopathy, reducing body, X-linked, severe early-onset, 300717 (3)/Scapuloperoneal myopathy, X-linked dominant, 300695 (3)

Polymicrogyria, bilateral temporooccipital, 612691 (3)/Amyotrophic lateral sclerosis 11, 612577 (3)/Charcot-Marie-Tooth disease, type 4J, 611228 (3)/Yunis-Varon syndrome, 216340 (3)

Premature ovarian failure 6, 612310 (3)

Bruck syndrome 1, 259450 (3)/Osteogenesis imperfecta, type XI, 610968 (3)

Ehlers-Danlos syndrome with progressive kyphoscoliosis, myopathy, and hearing loss, 614557 (3)

Infertility, male

Muscular dystrophy-dystroglycanopathy (congenital with brain and eye anomalies), type A, 5, 613153 (3)/Muscular dystrophy-dystroglycanopathy (congenital with or without mental retardation), type B, 5, 606612 (3)/Muscular dystrophy-dystroglycanopathy (limb-girdle), type C, 5, 607155 (3)

Cardiomyopathy, dilated, 1X, 611615 (3)/Muscular dystrophy-dystroglycanopathy (congenital with brain and eye anomalies), type A, 4, 253800 (3)/Muscular dystrophy-dystroglycanopathy (congenital without mental retardation), type B, 4, 613152 (3)/Muscular dystrophy-dystroglycanopathy (limb-girdle), type C, 4, 611588 (3)

Birt-Hogg-Dube syndrome, 135150 (3)/Colorectal cancer, somatic, 114500 (3)/Pneumothorax, primary spontaneous, 173600 (3)/Renal carcinoma, chromophobe, somatic, 144700 (3)

Ichthyosis vulgaris, 146700 (3)/Dermatitis, atopic, susceptibility to, 2, 605803 (3)

Cardiac valvular dysplasia, X-linked, 314400 (3)/Congenital short bowel syndrome, 300048 (3)/FG syndrome 2, 300321 (3)/Frontometaphyseal dysplasia, 305620 (3)/Heterotopia, periventricular, 300049 (3)/Heterotopia, periventricular, ED variant, 300537 (3)/Intestinal pseudoobstruction, neuronal, 300048 (3)/Melnick-Needles syndrome, 309350 (3)/Otopalatodigital syndrome, type I, 311300 (3)/Otopalatodigital syndrome, type II, 304120 (3)/Terminal osseous dysplasia, 300244 (3)

Atelosteogenesis, type I, 108720 (3)/Atelosteogenesis, type III, 108721 (3)/Boomerang dysplasia, 112310 (3)/Larsen syndrome, 150250 (3)/Spondylocarpotarsal synostosis syndrome, 272460 (3)

Myopathy, distal, 4, 614065 (3)/Myopathy, myofibrillar, 5, 609524 (3)

Leukemia, acute lymphoblastic, somatic, 613065 (3)/Leukemia, acute myeloid, 601626 (3)/Leukemia, acute myeloid, reduced survival in, 601626 (3)

Hemangioma, capillary infantile, somatic, 602089 (3)/Lymphedema, hereditary, IA, 153100 (3)

Ataxia, posterior column, with retinitis pigmentosa, 609033 (3)

Proliferative vasculopathy and hydraencephaly-hydrocephaly syndrome, 225790 (3)

Trimethylaminuria, 602079 (3)

Fragile X syndrome, 300624 (3)/Fragile X tremor/ataxia syndrome, 300623 (3)/Premature ovarian failure 1, 311360 (3)

Glomerulopathy with fibronectin deposits 2, 601894 (3)/Plasma fibronectin deficiency, 614101 (1)

Neurodegeneration due to cerebral folate transport deficiency, 613068 (3)

Axenfeld-Rieger syndrome, type 3, 602482 (3)/Iridogoniodysgenesis, type 1, 601631 (3)/Iris hypoplasia and glaucoma, 601631 (3)/Rieger or Axenfeld anomalies, 602482 (3)

FOXC2 Lymphedema-distichiasis syndrome with renal disease and diabetes mellitus, 153400 (3)/Lymphedema-distichiasis syndrome, 153400 (3)  
 FOXE1 Bamforth-Lazarus syndrome, 241850 (3)  
 FOXE3 Anterior segment mesenchymal dysgenesis, 107250 (3)/Aphakia, congenital primary, 610256 (3)  
 FOXF1 Alveolar capillary dysplasia with misalignment of pulmonary veins, 265380 (3)  
 FOXG1 Rett syndrome, congenital variant, 613454 (3)  
 FOXH1 Congenital heart defects  
 FOXI1 Enlarged vestibular aqueduct, 600791 (3)  
 FOXL2 Blepharophimosis, epicanthus inversus, and ptosis, type 1, 110100 (3)/Blepharophimosis, epicanthus inversus, and ptosis, type 2, 110100 (3)/Premature ovarian failure 3, 608996 (3)  
 FOXN1 T-cell immunodeficiency, congenital alopecia, and nail dystrophy, 601705 (3)  
 FOXO1 Rhabdomyosarcoma, alveolar, 268220 (3)  
 FOXP1 Mental retardation with language impairment and autistic features, 613670 (3)  
 FOXP2 Speech-language disorder-1, 602081 (3)  
 FOXP3 Immunodysregulation, polyendocrinopathy, and enteropathy, X-linked, 304790 (3)/Diabetes mellitus, type I, susceptibility to, 222100 (3)  
 FOXRED1 Leigh syndrome due to mitochondrial complex I deficiency, 256000 (3)/Mitochondrial complex I deficiency, 252010 (3)  
 FRA10A Fragile site, FRA10A  
 FRAS1 Fraser syndrome, 219000 (3)  
 FREM1 Bifid nose with or without anorectal and renal anomalies, 608980 (3)/Manitoba oculotrichoanal syndrome, 248450 (3)/Trigonocephaly 2, 614485 (3)  
 FREM2 Fraser syndrome, 219000 (3)  
 FRMD7 Nystagmus 1, congenital, X-linked, 310700 (3)/Nystagmus, infantile periodic alternating, X-linked, 310700 (3)  
 FRMPD4 Mental retardation, X-linked  
 FRY Intellectual disability  
 FSCN2 Retinitis pigmentosa 30, 607921 (3)  
 FSHB Follicle-stimulating hormone deficiency, isolated, 229070 (3)  
 FSHR Ovarian dysgenesis 1, 233300 (3)/Ovarian hyperstimulation syndrome, 608115 (3)/Ovarian response to FSH stimulation, 276400 (3)  
 FTCD Glutamate formiminotransferase deficiency, 229100 (3)  
 FTL Hyperferritinemia-cataract syndrome, 600886 (3)/L-ferritin deficiency, dominant and recessive, 615604 (3)/Neurodegeneration with brain iron accumulation 3, 606159 (3)  
 FTO Growth retardation, developmental delay, coarse facies, and early death, 612938 (3)  
 FTSJ1 Mental retardation, X-linked 9, 309549 (3)  
 FUCA1 Fucosidosis, 230000 (3)  
 FUS Amyotrophic lateral sclerosis 6, autosomal recessive, with or without frontotemporal dementia, 608030 (3)/Tremor, hereditary essential, 4, 614782 (3)  
 FUT1 [Bombay phenotype] (3)  
 FUT6 Fucosyltransferase 6 deficiency, 613852 (3)  
 FUZ Neural tube defects, 182940 (3)  
 FXN Friedreich ataxia with retained reflexes, 229300 (3)/Friedreich ataxia, 229300 (3)  
 FXYD2 Hypomagnesemia-2, renal, 154020 (3)  
 FYCO1 Cataract 18, autosomal recessive, 610019 (3)  
 FZD4 Exudative vitreoretinopathy 1, 133780 (3)/Retinopathy of prematurity, 133780 (3)  
 FZD6 Nail disorder, nonsyndromic congenital, 10, (claw-shaped nails), 614157 (3)  
 G6PC Glycogen storage disease Ia, 232200 (3)  
 G6PC3 Dursun syndrome, 612541 (3)/Neutropenia, severe congenital 4, autosomal recessive, 612541 (3)  
 G6PD Favism, 134700 (3)/Hemolytic anemia due to G6PD deficiency, 300908 (3)/Resistance to malaria due to G6PD deficiency, 611162 (3)  
 GAA Glycogen storage disease II, 232300 (3)  
 GABRA1 Epileptic encephalopathy, early infantile, 19, 615744 (3)/Epilepsy, childhood absence, susceptibility to, 4, 611136 (3)/Epilepsy, juvenile myoclonic, susceptibility to, 5, 611136 (3)

GABRB3 Epilepsy, childhood absence, susceptibility to, 5, 612269 (3)

GABRD Epilepsy, generalized, with febrile seizures plus, type 5, susceptibility to, 613060 (3)/Epilepsy, idiopathic generalized, 10, 613060 (3)/Epilepsy, juvenile myoclonic, susceptibility to, 613060 (3)

GABRG2 Epilepsy, generalized, with febrile seizures plus, type 3, 611277 (3)/Febrile seizures, familial, 8, 611277 (3)/Epilepsy, childhood absence, susceptibility to, 2, 607681 (3)

GAD1 Cerebral palsy, spastic quadriplegic, 1, 603513 (3)

GALC Krabbe disease, 245200 (3)

GALE Galactose epimerase deficiency, 230350 (3)

GALK1 Galactokinase deficiency with cataracts, 230200 (3)

GALNS Mucopolysaccharidosis IVA, 253000 (3)

GALNT3 Tumoral calcinosis, hyperphosphatemic, familial, 211900 (3)

GALT Galactosemia, 230400 (3)

GAMT Cerebral creatine deficiency syndrome 2, 612736 (3)

GAN Giant axonal neuropathy-1, 256850 (3)

GARS Charcot-Marie-Tooth disease, type 2D, 601472 (3)/Neuropathy, distal hereditary motor, type VA, 600794 (3)  
Anemia, X-linked, with/without neutropenia and/or platelet abnormalities, 300835 (3)/Leukemia, megakaryoblastic, with or without Down syndrome, somatic, 190685 (3)/Thrombocytopenia with beta-thalassemia, X-linked, 314050 (3)/Thrombocytopenia, X-linked, with or without dyserythropoietic anemia, 300367 (3)

GATA1 Emberger syndrome, 614038 (3)/Immunodeficiency 21, 614172 (3)/Leukemia, acute myeloid, susceptibility to, 601626 (3)/Myelodysplastic syndrome, susceptibility to, 614286 (3)

GATA2 Hypoparathyroidism, sensorineural deafness, and renal dysplasia, 146255 (3)

GATA3 Testicular anomalies with or without congenital heart disease, 615542 (3)/Atrial septal defect 2, 607941 (3)/Atrioventricular septal defect 4, 614430 (3)/Tetralogy of Fallot, 187500 (3)/Ventricular septal defect 1, 614429 (3)

GATA4 Atrial septal defect 9, 614475 (3)/Atrioventricular septal defect 5, 614474 (3)/Pancreatic agenesis and congenital heart defects, 600001 (3)/Persistent truncus arteriosus, 217095 (3)/Tetralogy of Fallot, 187500 (3)

GATA6 Cardiomyopathy, dilated, 2B, 614672 (3)

GATAD1 Mental retardation, autosomal dominant 18, 615074 (3)

GATAD2B Cerebral creatine deficiency syndrome 3, 612718 (3)

GATM Gaucher disease, perinatal lethal, 608013 (3)/Gaucher disease, type I, 230800 (3)/Gaucher disease, type II, 230900 (3)/Gaucher disease, type III, 231000 (3)/Gaucher disease, type IIIC, 231005 (3)/Lewy body dementia, susceptibility to, 127750 (3)/Parkinson disease, late-onset, susceptibility to, 168600 (3)

GBA Glycogen storage disease IV, 232500 (3)/Polyglucosan body disease, adult form, 263570 (3)

GBE1 Glutaricaciduria, type I, 231670 (3)

GCDH Dystonia, DOPA-responsive, with or without hyperphenylalaninemia, 128230 (3)/Hyperphenylalaninemia, BH4-deficient, B, 233910 (3)

GCH1 Diabetes mellitus, gestational, 125851 (3)/Diabetes mellitus, noninsulin-dependent, late onset, 125853 (3)/Diabetes mellitus, permanent neonatal, 606176 (3)/Hyperinsulinemic hypoglycemia, familial, 3, 602485 (3)/MODY, type II, 125851 (3)

GCK Hemolytic anemia due to gamma-glutamylcysteine synthetase deficiency, 230450 (3)/Myocardial infarction, susceptibility to, 608446 (3)

GCLC Hypoparathyroidism

GCM2 Adult i phenotype without cataract, 110800 (3)/Cataract 13 with adult i phenotype, 110800 (3)/[Blood group, Ii], 110800 (3)

GCNT2 Glycine encephalopathy, 605899 (3)

GCSH Charcot-Marie-Tooth disease, axonal, type 2K, 607831 (3)/Charcot-Marie-Tooth disease, axonal, with vocal cord paresis, 607706 (3)/Charcot-Marie-Tooth disease, recessive intermediate, A, 608340 (3)/Charcot-Marie-Tooth disease, type 4A, 214400 (3)

GDAP1 Double-outlet right ventricle, 217095 (3)/Right atrial isomerism, 208530 (3)/Tetralogy of Fallot, 187500 (3)/Transposition of great arteries, dextro-looped 3, 613854 (3)

GDF1 Klippel-Feil syndrome 3, autosomal dominant, 613702 (3)/Microphthalmia with coloboma 6, 613703 (3)/Microphthalmia, isolated 7, 613704 (3)

GDF3



Acromesomelic dysplasia, Hunter-Thompson type, 201250 (3)/Brachydactyly, type A1, C, 615072 (3)/Brachydactyly, type A2, 112600 (3)/Brachydactyly, type C, 113100 (3)/Chondrodysplasia, Grebe type, 200700 (3)/Du Pan syndrome, 228900 (3)/Multiple synostoses syndrome 2, 610017 (3)/Symphalangism, proximal, 1B, 615298 (3)/Osteoarthritis-5, 612400 (3)

**GDF5**

Klippel-Feil syndrome 1, autosomal dominant, 118100 (3)/Leber congenital amaurosis 17, 615360 (3)/Microphthalmia with coloboma 6, digenic, 613703 (3)/Microphthalmia, isolated 4, 613094 (3)

**GDF6**

Mental retardation, X-linked 41, 300849 (3)

**GDI1**

Central hypoventilation syndrome, 209880 (3)/Hirschsprung disease, susceptibility to, 3, 613711 (3)/Pheochromocytoma, modifier of, 171300 (3)

**GDNF**

Alexander disease, 203450 (3)

**GFAP**

Myopathy, mitochondrial progressive, with congenital cataract, hearing loss, and developmental delay, 613076 (3)

**GFER**

Neutropenia, nonimmune chronic idiopathic, of adults, 607847 (3)/Neutropenia, severe congenital 2, autosomal dominant, 613107 (3)

**GFI1**

Combined oxidative phosphorylation deficiency 1, 609060 (3)

**GFM1**

**GFPT1**

Myasthenia, congenital, with tubular aggregates 1, 610542 (3)

**GGCX**

Pseudoxanthoma elasticum-like disorder with multiple coagulation factor deficiency, 610842 (3)/Vitamin K-dependent clotting factors, combined deficiency of, 1, 277450 (3)

**GHI**

Growth hormone deficiency, isolated, type IA, 262400 (3)/Growth hormone deficiency, isolated, type IB, 612781 (3)/Growth hormone deficiency, isolated, type II, 173100 (3)/Kowarski syndrome, 262650 (3)

**GHR**

Increased responsiveness to growth hormone (3) Growth hormone insensitivity, partial, 604271 (3)/Laron dwarfism, 262500 (3)/Hypercholesterolemia, familial, modifier of, 143890 (3)

**GHRH**

**GHRHR**

Isolated growth hormone deficiency due to defect in GHRF (1)/Gigantism due to GHRF hypersecretion (1)

**GHRHR**

Growth hormone deficiency, isolated, type IB, 612781 (3)

**GHSR**

Growth hormone deficiency, isolated partial, 615925 (3)

**GIF**

Intrinsic factor deficiency, 261000 (3)

**GIGYF2**

Parkinson disease 11, 607688 (3)

**GIPC3**

Deafness, autosomal recessive 15, 601869 (3)

**GJA1**

Atrioventricular septal defect 3, 600309 (3)/Craniometaphyseal dysplasia, autosomal recessive, 218400 (3)/Hypoplastic left heart syndrome 1, 241550 (3)/Oculodentodigital dysplasia, 164200 (3)/Oculodentodigital dysplasia, autosomal recessive, 257850 (3)/Syndactyly, type III, 186100 (3)

**GJA3**

Cataract 14, multiple types, 601885 (3)

**GJA5**

Atrial fibrillation, familial, 11, 614049 (3)/Atrial standstill, digenic (GJA5/SCN5A), 108770 (3)

**GJA8**

Cataract 1, multiple types, 116200 (3)

**GJB1**

Charcot-Marie-Tooth neuropathy, X-linked dominant, 1, 302800 (3)

**GJB2**

Bart-Pumphrey syndrome, 149200 (3)/Deafness, autosomal dominant 3A, 601544 (3)/Deafness, autosomal recessive 1A, 220290 (3)/Hystrix-like ichthyosis with deafness, 602540 (3)/Keratitis-ichthyosis-deafness syndrome, 148210 (3)/Keratoderma, palmoplantar, with deafness, 148350 (3)/Vohwinkel syndrome, 124500 (3)

**GJB3**

Deafness, autosomal dominant 2B, 612644 (3)/Deafness, autosomal dominant, with peripheral neuropathy (3)/Deafness, autosomal recessive (3)/Deafness, digenic, GJB2/GJB3, 220290 (3)/Erythrokeratoderma variabilis et progressiva, 133200 (3)

**GJB4**

Erythrokeratoderma variabilis with erythema gyratum repens, 133200 (3)

**GJB6**

Deafness, autosomal dominant 3B, 612643 (3)/Deafness, autosomal recessive 1B, 612645 (3)/Deafness, digenic GJB2/GJB6, 220290 (3)/Ectodermal dysplasia 2, Clouston type, 129500 (3)

**GJC2**

Leukodystrophy, hypomyelinating, 2, 608804 (3)/Lymphedema, hereditary, IC, 613480 (3)/Spastic paraplegia 44, autosomal recessive, 613206 (3)

**GK**

Glycerol kinase deficiency, 307030 (3)

**GLA**

Fabry disease, 301500 (3)/Fabry disease, cardiac variant, 301500 (3)

**GLB1**

GM1-gangliosidosis, type I, 230500 (3)/GM1-gangliosidosis, type II, 230600 (3)/GM1-gangliosidosis, type III, 230650 (3)/Mucopolysaccharidosis type IVB (Morquio), 253010 (3)

**GLDC**

Glycine encephalopathy, 605899 (3)

**GLE1**

Arthrogryposis, lethal, with anterior horn cell disease, 611890 (3)/Lethal congenital contracture syndrome 1, 253310 (3)

GLI2 Culler-Jones syndrome, 615849 (3)/Holoprosencephaly-9, 610829 (3)

GLI3 Greig cephalopolysyndactylsyndrome, 175700 (3)/Pallister-Hall syndrome, 146510 (3)/Polydactyly, postaxial, types A1 and B, 174200 (3)/Polydactyly, preaxial, type IV, 174700 (3)/Hypothalamic hamartomas, somatic, 241800 (3)

GLIS2 Nephronophthisis 7, 611498 (3)

GLIS3 Diabetes mellitus, neonatal, with congenital hypothyroidism, 610199 (3)

GLMN Glomuvenous malformations

GLRA1 Hyperekplexia, hereditary 1, autosomal dominant or recessive, 149400 (3)

GLRB Hyperekplexia 2, autosomal recessive, 614619 (3)

GLRX5 Anemia, sideroblastic, pyridoxine-refractory, autosomal recessive, 205950 (3)

GLUD1 Hyperinsulinism-hyperammonemia syndrome, 606762 (3)

GLUL Glutamine deficiency, congenital, 610015 (3)

GLYCTK D-glyceric aciduria, 220120 (3)

GM2A GM2-gangliosidosis, AB variant, 272750 (3)

GMPS Leukemia, acute myelogenous, 601626 (3)

GNAI2 Pituitary ACTH-secreting adenoma (3)/Ventricular tachycardia, idiopathic, 192605 (3)

GNAI3 Auriculocondylar syndrome 1, 602483 (3)

GNAS ACTH-independent macronodular adrenal hyperplasia, 219080 (3)/Acromegaly, somatic, 102200 (3)/McCune-Albright syndrome, somatic, mosaic 174800 (3)/Osseous heteroplasia, progressive, 166350 (3)/Pseudohypoparathyroidism Ia, 103580 (3)/Pseudohypoparathyroidism Ib, 603233 (3)/Pseudohypoparathyroidism Ic, 612462 (3)/Pseudopseudohypoparathyroidism, 612463 (3)

GNAT1 Night blindness, congenital stationary, autosomal dominant 3, 610444 (3)

GNAT2 Achromatopsia-4, 613856 (3)

GNE Inclusion body myopathy, autosomal recessive, 600737 (3)/Nonaka myopathy, 605820 (3)/Sialuria, 269921 (3)

GNMT Glycine N-methyltransferase deficiency, 606664 (3)

GNPAT Chondrodysplasia punctata, rhizomelic, type 2, 222765 (3)

GNPTAB Mucopolipidosis II alpha/beta, 252500 (3)/Mucopolipidosis III alpha/beta, 252600 (3)

GNPTG Stuttering

GNRH1 Hypogonadotropic hypogonadism 12 with or without anosmia, 614841 (3)

GNRHR Fertile eunuch syndrome, 228300 (3)/Hypogonadotropic hypogonadism 7 without anosmia, 146110 (3)

GNS Mucopolysaccharidosis type IIID, 252940 (3)

GOLGA5 Thyroid carcinoma, papillary, 188550 (3)

GON4L Intellectual disability

GOPC Globozoospermia, 102530 (1)

GORAB Geroderma osteodysplasticum, 231070 (3)

GOSR2 Epilepsy, progressive myoclonic 6, 614018 (3)

GOT1 Aspartate aminotransferase, serum level of, QTL1, 614419 (3)

GP1BA Bernard-Soulier syndrome, type A1 (recessive), 231200 (3)/Bernard-Soulier syndrome, type A2 (dominant), 153670 (3)/von Willebrand disease, platelet-type, 177820 (3)/Nonarteritic anterior ischemic optic neuropathy, susceptibility to, 258660 (3)

GP1BB Bernard-Soulier syndrome, type B, 231200 (3)/Giant platelet disorder, isolated, 231200 (3)

GP6 Bleeding disorder, platelet-type, 11, 614201 (3)

GP9 Bernard-Soulier syndrome, type C, 231200 (3)

GPC3 Simpson-Golabi-Behmel syndrome, type 1, 312870 (3)/Wilms tumor, somatic, 194070 (3)

GPC6 Omodysplasia 1, 258315 (3)

GPD1 Hypertriglyceridemia, transient infantile, 614480 (3)

GPD1L Brugada syndrome 2 611777 (3)

GPHN Molybdenum cofactor deficiency C, 615501 (3)

GPI Hemolytic anemia, nonspherocytic, due to glucose phosphate isomerase deficiency, 613470 (3)

GPR143 Nystagmus 6, congenital, X-linked, 300814 (3)/Ocular albinism, type I, Nettleship-Falls type, 300500 (3)

GPR179 Night blindness, congenital stationary (complete), 1E, autosomal recessive, 614565 (3)

GPR56 Polymicrogyria, bilateral frontoparietal, 606854 (3)/Polymicrogyria, bilateral perisylvian, 615752 (3)

GPR98 Febrile seizures, familial, 4, 604352 (3)/Usher syndrome, type 2C, 605472 (3)/Usher syndrome, type 2C, GPR98/PDZD7 digenic, 605472 (3)

GPSM2 Chudley-McCullough syndrome, 604213 (3)

GPX1 Hemolytic anemia due to glutathione peroxidase deficiency, 614164 (1)

GRHL2 Deafness, autosomal dominant 28, 608641 (3)/Ectodermal dysplasia/short stature syndrome, 616029 (3)

GRHPR Hyperoxaluria, primary, type II, 260000 (3)

GRIA3 Mental retardation, X-linked 94, 300699 (3)

GRIK2 Mental retardation, autosomal recessive, 6, 611092 (3)

GRIN1 Mental retardation, autosomal dominant 8, 614254 (3)

GRIN2A Epilepsy, focal, with speech disorder and with or without mental retardation, 245570 (3)

GRIN2B Epileptic encephalopathy, early infantile, 27, 616139 (3)/Mental retardation, autosomal dominant 6, 613970 (3)

GRIP1 Fraser syndrome, 219000 (3)

GRK1 Oguchi disease-2, 613411 (3)

GRM1 Spinocerebellar ataxia, autosomal recessive 13, 614831 (3)

GRM6 Night blindness, congenital stationary (complete), 1B, autosomal recessive, 257270 (3)

GRN Aphasia, primary progressive, 607485 (3)/Ceroid lipofuscinosis, neuronal, 11, 614706 (3)/Frontotemporal lobar degeneration with ubiquitin-positive inclusions, 607485 (3)

GRPR Autism and multiple exostoses

GRXCR1 Deafness, autosomal recessive 25, 613285 (3)

GSN Amyloidosis, Finnish type, 105120 (3)

GSR Hemolytic anemia due to glutathione reductase deficiency (1)

GSS Glutathione synthetase deficiency, 266130 (3)/Hemolytic anemia due to glutathione synthetase deficiency, 231900 (3)

GTDC2 Walker-Warburg syndrome

GTF2H5 Trichothiodystrophy, complementation group A, 601675 (3)

GUCA1A Cone dystrophy-3, 602093 (3)/Cone-rod dystrophy 14, 602093 (3)

GUCA1B Retinitis pigmentosa 48, 613827 (3)

GUCY2C Diarrhea 6, 614616 (3)/Meconium ileus, 614665 (3)

GUCY2D Cone-rod dystrophy 6, 601777(3)/Leber congenital amaurosis 1, 204000 (3)

GUSB Mucopolysaccharidosis VII, 253220 (3)

GYG1 Glycogen storage disease XV, 613507 (3)/Polyglucosan body myopathy 2, 616199 (3)

GYS1 Glycogen storage disease 0, muscle, 611556 (3)

GYS2 Glycogen storage disease 0, liver, 240600 (3)

H6PD Cortisone reductase deficiency 1, 604931 (3)

HADH Hypoglycaemia, hyperinsulinaemic

HADHA Fatty liver, acute, of pregnancy, 609016 (3)/HELLP syndrome, maternal, of pregnancy, 609016 (3)/LCHAD deficiency, 609016 (3)/Trifunctional protein deficiency, 609015 (3)

HADHB Trifunctional protein deficiency, 609015 (3)

HAGH [Glyoxalase II deficiency], 614033 (1)

HAMP Hemochromatosis, type 2B, 613313 (3)

HARS Usher syndrome type 3B, 614504 (3)

HARS2 Perrault syndrome 2, 614926 (3)

HAX1 Neutropenia, severe congenital 3, autosomal recessive, 610738 (3)

HBA1 Erythremias, alpha- (3)/Heinz body anemias, alpha-, 140700 (3)/Hemoglobin H disease, nondeletional, 613978 (3)/Methemoglobinemias, alpha- (3)/Thalassemias, alpha-, 604131 (3)

HBA2 Erythrocytosis (3)/Heinz body anemia, 140700 (3)/Hemoglobin H disease, nondeletional, 613978 (3)/Hypochromic microcytic anemia (3)/Thalassemia, alpha-, 604131 (3)

HBB Delta-beta thalassemia, 141749 (3)/Erythremias, beta- (3)/Heinz body anemias, beta-, 140700 (3)/Hereditary persistence of fetal hemoglobin, 141749 (3)/Methemoglobinemias, beta- (3)/Sickle cell anemia, 603903 (3)/Thalassemia-beta, dominant inclusion-body, 603902 (3)/Thalassemias, beta-, 613985 (3)/Malaria, resistance to, 611162 (3)

HBD Thalassemia due to Hb Lepore (3)/Thalassemia, delta- (3)

HBE1 Thalassemia gamma-delta-beta

|          |                                                                                                                                                                                                                                                                                         |
|----------|-----------------------------------------------------------------------------------------------------------------------------------------------------------------------------------------------------------------------------------------------------------------------------------------|
| HBEGF    | Diphtheria, susceptibility to (1)                                                                                                                                                                                                                                                       |
| HBG1     | Fetal hemoglobin quantitative trait locus 1, 141749 (3)                                                                                                                                                                                                                                 |
| HBG2     | Cyanosis, transient neonatal, 613977 (3)/Fetal hemoglobin quantitative trait locus 1, 141749 (3)                                                                                                                                                                                        |
| HCCS     | Microphthalmia, syndromic 7, 309801 (3)                                                                                                                                                                                                                                                 |
| HCFC1    | Mental retardation, X-linked 3 (methylmalonic acidemia and homocysteinemia, cblX type ), 309541 (3)                                                                                                                                                                                     |
| HCN4     | Brugada syndrome 8, 613123 (3)/Sick sinus syndrome 2, 163800 (3)                                                                                                                                                                                                                        |
| HCRT     | Narcolepsy 1, 161400 (3)                                                                                                                                                                                                                                                                |
| HDAC4    | Brachydactyly-mental retardation syndrome, 600430 (3)                                                                                                                                                                                                                                   |
| HDAC8    | Cornelia de Lange syndrome 5, 300882 (3)/Wilson-Turner syndrome, 309585 (3)                                                                                                                                                                                                             |
| HEATR2   | Ciliary dyskinesia, primary, 18, 614874 (3)                                                                                                                                                                                                                                             |
| HEPACAM  | Megalencephalic leukoencephalopathy with subcortical cysts 2A, 613925 (3)/Megalencephalic leukoencephalopathy with subcortical cysts 2B, remitting, with or without mental retardation, 613926 (3)                                                                                      |
| HES7     | Spondylocostal dysostosis 4, autosomal recessive, 613686 (3)                                                                                                                                                                                                                            |
| HESX1    | Growth hormone deficiency with pituitary anomalies, 182230 (3)/Pituitary hormone deficiency, combined, 5, 182230 (3)/Septooptic dysplasia, 182230 (3)                                                                                                                                   |
| HEXA     | GM2-gangliosidosis, several forms, 272800 (3)/Tay-Sachs disease, 272800 (3)/[Hex A pseudodeficiency], 272800 (3)                                                                                                                                                                        |
| HEXB     | Sandhoff disease, infantile, juvenile, and adult forms, 268800 (3)                                                                                                                                                                                                                      |
| HFE      | Hemochromatosis, 235200 (3)/[Transferrin serum level QTL2], 614193 (3)/Alzheimer disease, susceptibility to, 104300 (3)/Microvascular complications of diabetes 7, 612635 (3)/Porphyria cutanea tarda, susceptibility to, 176100 (3)/Porphyria variegata, susceptibility to, 176200 (3) |
| HFE2     | Haemochromatosis                                                                                                                                                                                                                                                                        |
| HGD      | Alkaptonuria, 203500 (3)                                                                                                                                                                                                                                                                |
| HGF      | Deafness, autosomal recessive 39, 608265 (3)                                                                                                                                                                                                                                            |
| HGSNAT   | Mucopolysaccharidosis type IIIC (Sanfilippo C), 252930 (3)                                                                                                                                                                                                                              |
| HIBCH    | 3-hydroxyisobutryl-CoA hydrolase deficiency, 250620 (3)                                                                                                                                                                                                                                 |
| HINT1    | Neuromyotonia and axonal neuropathy, autosomal recessive, 137200 (3)                                                                                                                                                                                                                    |
| HIP1     | Prostate cancer, progression of, 176807 (1)                                                                                                                                                                                                                                             |
| HIST3H3  | Intellectual disability                                                                                                                                                                                                                                                                 |
| HIVEP2   | Mental retardation, autosomal dominant 43 616977 (3)                                                                                                                                                                                                                                    |
| HK1      | Hemolytic anemia due to hexokinase deficiency, 235700 (3)/Neuropathy, hereditary motor and sensory, Russe type, 605285 (3)                                                                                                                                                              |
| HLA-A    | Hypersensitivity syndrome, carbamazepine-induced, susceptibility to, 608579 (3)                                                                                                                                                                                                         |
| HLA-DQB1 | Celiac disease, susceptibility to, 212750 (3)/Creutzfeldt-Jakob disease, variant, resistance to, 123400 (3)/Multiple sclerosis, susceptibility to, 1, 126200 (3)                                                                                                                        |
| HLA-DRB1 | Multiple sclerosis, susceptibility to, 1, 126200 (3)/Pemphigoid, susceptibility to (2)/Rheumatoid arthritis, susceptibility to, 180300 (3)/Sarcoidosis, susceptibility to, 1, 181000 (3)                                                                                                |
| HLCS     | Holocarboxylase synthetase deficiency, 253270 (3)                                                                                                                                                                                                                                       |
| HMBS     | Porphyria, acute intermittent, 176000 (3)/Porphyria, acute intermittent, nonerythroid variant, 176000 (3)                                                                                                                                                                               |
| HMGA1    | Diabetes mellitus, noninsulin-dependent, susceptibility to, 125853 (3)                                                                                                                                                                                                                  |
| HMGA2    | Leiomyoma, uterine, somatic, 150699 (2)                                                                                                                                                                                                                                                 |
| HMGCL    | HMG-CoA lyase deficiency, 246450 (3)                                                                                                                                                                                                                                                    |
| HMGCS2   | HMG-CoA synthase-2 deficiency, 605911 (3)                                                                                                                                                                                                                                               |
| HMOX1    | Heme oxygenase-1 deficiency, 614034 (3)/Pulmonary disease, chronic obstructive, susceptibility to, 606963 (3)                                                                                                                                                                           |
| HMX1     | Oculoauricular syndrome, 612109 (3)                                                                                                                                                                                                                                                     |
| HNF1A    | Diabetes mellitus, insulin-dependent, 20, 612520 (3)/Hepatic adenoma, somatic, 142330 (3)/MODY, type III, 600496 (3)/Renal cell carcinoma, 144700 (3)/Diabetes mellitus, insulin-dependent, 222100 (3)/Diabetes mellitus, noninsulin-dependent, 2, 125853 (3)                           |
| HNF1B    | Diabetes mellitus, noninsulin-dependent, 125853 (3)/Renal cysts and diabetes syndrome, 137920 (3)/Renal cell carcinoma, 144700 (3)                                                                                                                                                      |
| HNF4A    | Fanconi renotubular syndrome 4, with maturity-onset diabetes of the young, 616026 (3)/MODY, type I, 125850 (3)/Diabetes mellitus, noninsulin-dependent, 125853 (3)                                                                                                                      |
| HOGA1    | Hyperoxaluria, primary, type III, 613616 (3)                                                                                                                                                                                                                                            |

HOXA1 Athabaskan brainstem dysgenesis syndrome, 601536 (3)/Bosley-Salih-Alorainy syndrome, 601536 (3)

HOXA11 Radioulnar synostosis with amegakaryocytic thrombocytopenia, 605432 (3)

HOXA13 Guttacher syndrome, 176305 (3)/Hand-foot-uterus syndrome, 140000 (3)

HOXA2 Microtia with or without hearing impairment (AD), 612290 (3)/

HOXB1 Facial paresis, hereditary congenital, 3, 614744 (3)

HOXC13 Ectodermal dysplasia 9, hair/nail type, 614931 (3)

HOXC13-AS Ectodermal dysplasia 9, hair/nail type 614931 (3)

HOXD10 Charcot-Marie-Tooth disease, foot deformity of, 192950 (3)/Vertical talus, congenital, 192950 (3)  
VACTERL association, 192350 (3)/Brachydactyly, type D, 113200 (3)/Brachydactyly, type E, 113300

HOXD13 (3)/Brachydactyly-syndactyly syndrome, 610713 (3)/Syndactyly, type V, 186300 (3)/Synpolydactyly with foot anomalies, 186000 (3)/Synpolydactyly, type II, 186000 (3)

HPD Hawkinsinuria, 140350 (3)/Tyrosinemia, type III, 276710 (3)

HPGD Cranioosteoarthropathy, 259100 (3)/Digital clubbing, isolated congenital, 119900 (3)/Hypertrophic osteoarthropathy, primary, autosomal recessive 1, 259100 (3)

HPRT1 HPRT-related gout, 300323 (3)/Lesch-Nyhan syndrome, 300322 (3)

HPS1 Hermansky-Pudlak syndrome 1, 203300 (3)

HPS3 Hermansky-Pudlak syndrome 3, 614072 (3)

HPS4 Hermansky-Pudlak syndrome 4, 614073 (3)

HPS5 Hermansky-Pudlak syndrome 5, 614074 (3)

HPS6 Hermansky-Pudlak syndrome 6, 614075 (3)

HPSE2 Urofacial syndrome 1, 236730 (3)

HR Alopecia universalis, 203655 (3)/Atrichia with papular lesions, 209500 (3)/Hypotrichosis 4, 146550 (3)  
Congenital myopathy with excess of muscle spindles, 218040 (3)/Costello syndrome, 218040

HRAS (3)/Schimmelpenning-Feuerstein-Mims syndrome, somatic mosaic, 163200 (3)/Bladder cancer, somatic, 109800 (3)/Nevus sebaceous, somatic, 162900 (3)/Thyroid carcinoma, follicular, somatic, 188470 (3)

HRG Thrombophilia due to HRG deficiency, 613116 (3)/Thrombophilia due to elevated HRG, 613116 (1)

HS6ST1 Hypogonadotropic hypogonadism 15 with or without anosmia, 614880 (3)

HSD11B1 Cortisone reductase deficiency 2, 614662 (3)

HSD11B2 Apparent mineralocorticoid excess, 218030 (3)

HSD17B10 17-beta-hydroxysteroid dehydrogenase X deficiency, 300438 (3)/

HSD17B3 Pseudohermaphroditism, male, with gynecomastia, 264300 (3)

HSD17B4 D-bifunctional protein deficiency, 261515 (3)/Perrault syndrome 1, 233400 (3)

HSD3B2 3-beta-hydroxysteroid dehydrogenase, type II, deficiency, 201810 (3)

HSD3B7 Bile acid synthesis defect, congenital, 1, 607765 (3)

HSF4 Cataract 5, multiple types, 116800 (3)

HSPB1 Charcot-Marie-Tooth disease, axonal, type 2F, 606595 (3)/Neuropathy, distal hereditary motor, type IIB, 608634 (3)

HSPB3 Neuronopathy, distal hereditary motor, type IIC, 613376 (3)

HSPB8 Charcot-Marie-Tooth disease, axonal, type 2L, 608673 (3)/Neuropathy, distal hereditary motor, type IIA, 158590 (3)

HSPD1 Leukodystrophy, hypomyelinating, 4, 612233 (3)/Spastic paraplegia 13, autosomal dominant, 605280 (3)

HSPG2 Dyssegmental dysplasia, Silverman-Handmaker type, 224410 (3)/Schwartz-Jampel syndrome, type 1, 255800 (3)

HTR1A Periodic fever, menstrual cycle dependent, 614674 (3)

HTRA1 CARASIL syndrome, 600142 (3)/Macular degeneration, age-related, 7, 610149 (3)/Macular degeneration, age-related, neovascular type, 610149 (3)

HTRA2 Parkinson disease 13, 610297 (3)

HTT Huntington disease, 143100 (3)

HUWE1 Mental retardation, X-linked syndromic, Turner type, 300706 (3)

HYAL1 Mucopolysaccharidosis type IX, 601492 (3)

HYDIN Ciliary dyskinesia, primary, 5, 608647 (3)

HYLS1 Hydrolethalus syndrome, 236680 (3)

ICAM1 Malaria, cerebral, susceptibility to, 611162 (3)

ICK Endocrine-cerebroosteodysplasia, 612651 (3)

ICOS Immunodeficiency, common variable, 1, 607594 (3)  
 IDH2 D-2-hydroxyglutaric aciduria 2, 613657 (3)  
 IDH3B Retinitis pigmentosa 46, 612572 (3)  
 IDS Mucopolysaccharidosis II, 309900 (3)  
 IDUA Mucopolysaccharidosis Ih, 607014 (3)/Mucopolysaccharidosis Ih/s, 607015 (3)/Mucopolysaccharidosis Is, 607016 (3)  
 IER3IP1 Microcephaly, epilepsy, and diabetes syndrome, 614231 (3)  
 IFITM5 Osteogenesis imperfecta, type V, 610967 (3)  
 IFNAR2 Hepatitis B virus, susceptibility to, 610424 (3)  
 IFNG AIDS, rapid progression to, 609423 (3)/Aplastic anemia, 609135 (3)/Hepatitis C virus, response to therapy of, 609532 (3)/TSC2 angiomyolipomas, renal, modifier of, 613254 (3)/Tuberculosis, protection against, 607948 (3)  
 IFNGR1 Immunodeficiency 27A, mycobacteriosis, AR, 209950 (3)/Immunodeficiency 27B, mycobacteriosis, AD, 615978 (3)/H. pylori infection, susceptibility to, 600263 (3)/Hepatitis B virus infection, susceptibility to, 610424 (3)/Tuberculosis infection, protection against, 607948 (3)/Tuberculosis, susceptibility to, 607948 (3)  
 IFNGR2 Immunodeficiency 28, mycobacteriosis, 614889 (3)  
 IFT122 Cranioectodermal dysplasia 1, 218330 (3)  
 IFT140 Short-rib thoracic dysplasia 9 with or without polydactyly, 266920 (3)  
 IFT43 Cranioectodermal dysplasia 3, 614099 (3)  
 IFT80 Short-rib thoracic dysplasia 2 with or without polydactyly, 611263 (3)  
 IGBP1 Corpus callosum, agenesis of, with mental retardation, ocular coloboma and micrognathia, 300472 (3)  
 IGF1 Growth retardation with deafness and mental retardation due to IGF1 deficiency, 608747 (3)  
 IGF1R Insulin-like growth factor I, resistance to, 270450 (3)  
 IGF2 ?Growth restriction, severe, with distinctive facies 616489 (3)  
 IGFBP7 Retinal arterial macroaneurysm with supraaortic pulmonic stenosis, 614224 (3)  
 IGFBP7-AS1 Retinal arterial macroaneurysm with supraaortic pulmonic stenosis 614224 (3)  
 IGHM Agammaglobulinemia 1, 601495 (3)  
 IGHMBP2 Charcot-Marie-Tooth disease, axonal, type 2S, 616155 (3)/Neuronopathy, distal hereditary motor, type VI, 604320 (3)  
 IGKC [Kappa light chain deficiency], 614102 (3)  
 IGLL1 Agammaglobulinemia 2, 613500 (3)  
 IGSF1 Hypothyroidism, central, and testicular enlargement, 300888 (3)  
 IHH Acrocapitofemoral dysplasia, 607778 (3)/Brachydactyly, type A1, 112500 (3)  
 IKBKAP Dysautonomia, familial, 223900 (3)  
 IKBKG Ectodermal dysplasia, hypohidrotic, with immune deficiency, 300291 (3)/Ectodermal, dysplasia, anhidrotic, lymphedema and immunodeficiency, 300301 (3)/Immunodeficiency 33, 300636 (3)/Immunodeficiency, isolated, 300584 (3)/Incontinentia pigmenti, type II, 308300 (3)/Invasive pneumococcal disease, recurrent isolated, 2, 300640 (3)  
 IL10RA Inflammatory bowel disease 28, early onset, autosomal recessive, 613148 (3)  
 IL10RB Enterocolitis, early-onset  
 IL11RA Craniosynostosis and dental anomalies, 614188 (3)  
 IL12B Immunodeficiency 29, mycobacteriosis, 614890 (3)/Asthma, susceptibility to, 600807 (3)  
 IL12RB1 Immunodeficiency 30, 614891 (3)  
 IL17F Candidiasis, familial, 6, autosomal dominant, 613956 (3)  
 IL17RA Candidiasis, familial, 5, autosomal recessive, 613953 (3)  
 IL1RAPL1 Mental retardation, X-linked 21/34, 300143 (3)  
 IL1RN Interleukin 1 receptor antagonist deficiency, 612852 (3)/Gastric cancer risk after H. pylori infection, 137215 (3)/Microvascular complications of diabetes 4, 612628 (3)  
 IL21R Immunodeficiency, primary, autosomal recessive, IL21R-related, 615207 (3)/[IgE, elevated level of], 147050 (3)  
 IL2RA Interleukin-2 receptor, alpha chain, deficiency of, 606367 (3)/Diabetes, mellitus, insulin-dependent, susceptibility to, 10, 601942 (3)  
 IL2RG Combined immunodeficiency, X-linked, moderate, 312863 (3)/Severe combined immunodeficiency, X-linked, 300400 (3)

IL31RA Amyloidosis, primary localized cutaneous, 2, 613955 (3)  
 IL36RN Psoriasis 14, pustular, 614204 (3)  
 IL4R AIDS, slow progression to, 609423 (3)/Atopy, susceptibility to, 147050 (3)  
 IL6 {Crohn disease-associated growth failure} 266600 (3)/{Diabetes, susceptibility to}, 222100 (3)/{Intracranial hemorrhage in brain cerebrovascular malformations, susceptibility to}, 108010 (3)/{Kaposi sarcoma, susceptibility to}, 148000 (3)/{Rheumatoid arthritis, systemic juvenile}, 604302 (3)  
 IL7R Severe combined immunodeficiency, T-cell negative, B-cell/natural killer cell-positive type, 608971 (3)  
 ILDR1 Deafness, autosomal recessive 42, 609646 (3)  
 ILK Cardiomyopathy, dilated  
 IMPAD1 Chondrodysplasia with joint dislocations, GRAPP type, 614078 (3)  
 IMPDH1 Leber congenital amaurosis 11, 613837 (3)/Retinitis pigmentosa 10, 180105 (3)  
 IMPG2 Macular dystrophy, vitelliform, 5, 616152 (3)/Retinitis pigmentosa 56, 613581 (3)  
 INF2 Charcot-Marie-Tooth disease, dominant intermediate E, 614455 (3)/Glomerulosclerosis, focal segmental, 5, 613237 (3)  
 ING1 Squamous cell carcinoma, head and neck, somatic, 275355 (3)  
 INPP5E Joubert syndrome 1, 213300 (3)/Mental retardation, truncal obesity, retinal dystrophy, and micropenis, 610156 (3)  
 INS Diabetes mellitus, insulin-dependent, 2, 125852 (3)/Diabetes mellitus, permanent neonatal, 606176 (3)/Hyperproinsulinemia, 616214 (3)/Maturity-onset diabetes of the young, type 10, 613370 (3)  
 INSL3 Cryptorchidism, 219050 (3)  
 INSR Diabetes mellitus, insulin-resistant, with acanthosis nigricans, 610549 (3)/Hyperinsulinemic hypoglycemia, familial, 5, 609968 (3)/Leprechaunism, 246200 (3)/Rabson-Mendenhall syndrome, 262190 (3)  
 INVS Nephronophthisis 2, infantile, 602088 (3)  
 IQCB1 Senior-Loken syndrome 5, 609254 (3)  
 IQSEC2 Mental retardation, X-linked 1, 309530 (3)  
 IRAK4 IRAK4 deficiency, 607676 (3)/Invasive pneumococcal disease, recurrent isolated, 1, 610799 (3)  
 IRF1 Gastric cancer, somatic, 613659 (3)/Myelodysplastic syndrome, preleukemic (3)/Myelogenous leukemia, acute (3)/Non-small cell lung cancer, somatic, 211980 (3)  
 IRF4 [Skin/hair/eye pigmentation, variation in, 8], 611724 (3)  
 IRF6 Orofacial cleft 6, 608864 (3)/Popliteal pterygium syndrome 1, 119500 (3)/van der Woude syndrome, 119300 (3)  
 IRF8 Immunodeficiency 32A, mycobacteriosis, autosomal dominant, 614893 (3)/Immunodeficiency 32B, monocyte and dendritic cell deficiency, autosomal recessive, 614894 (3)  
 IRGM Inflammatory bowel disease 19, 612278 (3)/Mycobacterium tuberculosis, protection against, 607948 (3)  
 IRX5 Hamamy syndrome, 611174 (3)  
 ISCU Myopathy with lactic acidosis, hereditary, 255125 (3)  
 ISPD Muscular dystrophy-dystroglycanopathy (congenital with brain and eye anomalies), type A, 7, 614643 (3)/Muscular dystrophy-dystroglycanopathy (limb-girdle), type C, 7, 616052 (3)  
 ITCH Autoimmune disease, multisystem, with facial dysmorphism, 613385 (3)  
 ITGA2 Glycoprotein Ia deficiency, 614200 (1)  
 ITGA2B Bleeding disorder, platelet-type, 16, autosomal dominant, 187800 (3)/Glanzmann thrombasthenia, 273800 (3)/Thrombocytopenia, neonatal alloimmune, BAK antigen related (3)  
 ITGA3 Interstitial lung disease, nephrotic syndrome, and epidermolysis bullosa, congenital, 614748 (3)  
 ITGA6 Epidermolysis bullosa, junctional, with pyloric stenosis, 226730 (3)  
 ITGA7 Muscular dystrophy, congenital, due to ITGA7 deficiency, 613204 (3)  
 ITGAM Systemic lupus erythematosus, association with susceptibility to, 6, 609939 (3)  
 ITGB2 Leukocyte adhesion deficiency, 116920 (3)  
 ITGB3 Bleeding disorder, platelet-type, 16, autosomal dominant, 187800 (3)/Glanzmann thrombasthenia, 273800 (3)/Purpura, posttransfusion (3)/Thrombocytopenia, neonatal alloimmune (3)/Myocardial infarction, susceptibility to, 608446 (3)  
 ITGB4 Epidermolysis bullosa of hands and feet, 131800 (3)/Epidermolysis bullosa, junctional, non-Herlitz type, 226650 (3)/Epidermolysis bullosa, junctional, with pyloric atresia, 226730 (3)  
 ITK Lymphoproliferative syndrome 1, 613011 (3)  
 ITM2B Dementia, familial British 176500 (3)/Dementia, familial Danish 117300 (3)

ITPR1 Spinocerebellar ataxia 15, 606658 (3)/Spinocerebellar ataxia 29, congenital nonprogressive, 117360 (3)

IVD Isovaleric acidemia, 243500 (3)

IYD Thyroid dysmorphogenesis 4, 274800 (3)

JAG1 Alagille syndrome, 118450 (3)/Deafness, congenital heart defects, and posterior embryotoxon (3)/Tetralogy of Fallot, 187500 (3)

JAK2 Erythrocytosis, somatic, 133100 (3)/Leukemia, acute myelogenous, 601626 (3)/Myelofibrosis, somatic, 254450 (3)/Polycythemia vera, 263300 (3)/Thrombocytopenia 3, 614521 (3)/Budd-Chiari syndrome, 600880 (3)

JAK3 SCID, autosomal recessive, T-negative/B-positive type, 600802 (3)

JAM3 Hemorrhagic destruction of the brain, subependymal calcification, and cataracts, 613730 (3)

JPH2 Cardiomyopathy, familial hypertrophic 17, 613873 (3)

JPH3 Huntington disease-like 2, 606438 (3)

JUP Arrhythmogenic right ventricular dysplasia 12, 611528 (3)/Naxos disease, 601214 (3)

KAL1 Hypogonadotropic hypogonadism 1 with or without anosmia (Kallmann syndrome 1), 308700 (3)

KANK1 Cerebral palsy, spastic quadriplegic, 2, 612900 (3)

KANSL1 Koolen-De Vries syndrome, 610443 (3)

KARS Charcot-Marie-Tooth disease, recessive intermediate, B, 613641 (3)/Deafness, autosomal recessive 89, 613916 (3)

KAT6B Genitopatellar syndrome, 606170 (3)/SBBYSS syndrome, 603736 (3)

KBTBD13 Nematode myopathy 6, autosomal dominant, 609273 (3)

KCNA1 Episodic ataxia/myokymia syndrome, 160120 (3)

KCNA5 Atrial fibrillation, familial, 7, 612240 (3)

KCNC3 Spinocerebellar ataxia 13, 605259 (3)

KCNE1 Jervell and Lange-Nielsen syndrome 2, 612347 (3)/Long QT syndrome 5, 613695 (3)

KCNE1L Idiopathic ventricular fibrillation

KCNE2 Atrial fibrillation, familial, 4, 611493 (3)/Long QT syndrome 6, 613693 (3)

KCNE3 Brugada syndrome 6, 613119 (3)

KCNH2 Long QT syndrome 2, 613688 (3)/Short QT syndrome 1, 609620 (3)/Long QT syndrome 2, acquired, susceptibility to, 613688 (3)

KCNJ1 Bartter syndrome, type 2, 241200 (3)

KCNJ10 Enlarged vestibular aqueduct, digenic, 600791 (3)/SESAME syndrome, 612780 (3)

KCNJ11 Diabetes mellitus, permanent neonatal, with neurologic features, 606176 (3)/Diabetes mellitus, transient neonatal, 3, 610582 (3)/Diabetes, permanent neonatal, 606176 (3)/Hyperinsulinemic hypoglycemia, familial, 2, 601820 (3)/Diabetes mellitus, type 2, susceptibility to, 125853 (3)

KCNJ13 Leber congenital amaurosis 16, 614186 (3)/Snowflake vitreoretinal degeneration, 193230 (3)

KCNJ2 Andersen syndrome, 170390 (3)/Atrial fibrillation, familial, 9, 613980 (3)/Short QT syndrome 3, 609622 (3)

KCNJ5 Hyperaldosteronism, familial, type III, 613677 (3)/Long QT syndrome 13, 613485 (3)

KCNJ8 Sudden infant death syndrome

KCNK9 Birk-Barel mental retardation dysmorphism syndrome, 612292 (3)

KCNMA1 Generalized epilepsy and paroxysmal dyskinesia, 609446 (3)

KCNQ1 Atrial fibrillation, familial, 3, 607554 (3)/Jervell and Lange-Nielsen syndrome, 220400 (3)/Long QT syndrome 1, 192500 (3)/Short QT syndrome 2, 609621 (3)/Long QT syndrome 1, acquired, susceptibility to, 192500 (3)

KCNQ1OT1 Beckwith-Wiedemann syndrome 130650 (3)

KCNQ2 Epileptic encephalopathy, early infantile, 7, 613720 (3)/Myokymia, 121200 (3)/Seizures, benign neonatal, 1, 121200 (3)

KCNQ3 Seizures, benign neonatal, type 2, 121201 (3)

KCNQ4 Deafness, autosomal dominant 2A, 600101 (3)

KCNT1 Epilepsy, nocturnal frontal lobe, 5, 615005 (3)/Epileptic encephalopathy, early infantile, 14, 614959 (3)

KCNV2 Retinal cone dystrophy 3B, 610356 (3)

KCTD7 Epilepsy, progressive myoclonic 3, with or without intracellular inclusions, 611726 (3)

KDM5A Congenital heart disease

KDM5C Mental retardation, X-linked, syndromic, Claes-Jensen type, 300534 (3)

KDM6A Kabuki syndrome 2, 300867 (3)



|          |                                                                                                                                                                                                                                                                                                                                          |
|----------|------------------------------------------------------------------------------------------------------------------------------------------------------------------------------------------------------------------------------------------------------------------------------------------------------------------------------------------|
| KDM6B    | Intellectual disability                                                                                                                                                                                                                                                                                                                  |
| KDR      | Hemangioma, capillary infantile, somatic, 602089 (3)/Hemangioma, capillary infantile, susceptibility to, 602089 (3)                                                                                                                                                                                                                      |
| KERA     | Cornea plana congenita, recessive, 217300 (3)                                                                                                                                                                                                                                                                                            |
| KHDC3L   | Hydatidiform mole, recurrent, 2, 614293 (3)                                                                                                                                                                                                                                                                                              |
| KIAA0196 | Ritscher-Schinzel syndrome, 220210 (3)/Spastic paraplegia 8, autosomal dominant, 603563 (3)                                                                                                                                                                                                                                              |
| KIAA0226 | Spinocerebellar ataxia, autosomal recessive 15, 615705 (3)                                                                                                                                                                                                                                                                               |
| KIAA1279 | Goldberg-Shprintzen megacolon syndrome, 609460 (3)                                                                                                                                                                                                                                                                                       |
| KIAA2022 | Mental retardation, X-linked 98, 300912 (3)                                                                                                                                                                                                                                                                                              |
| KIF11    | Microcephaly with or without chorioretinopathy, lymphedema, or mental retardation, 152950 (3)                                                                                                                                                                                                                                            |
| KIF1A    | Mental retardation, autosomal dominant 9, 614255 (3)/Neuropathy, hereditary sensory, type IIC, 614213 (3)/Spastic paraplegia 30, autosomal recessive, 610357 (3)                                                                                                                                                                         |
| KIF1B    | Charcot-Marie-Tooth disease, type 2A1, 118210 (3)/Pheochromocytoma, 171300 (3)/Neuroblastoma, susceptibility to, 1, 256700 (3)                                                                                                                                                                                                           |
| KIF21A   | Fibrosis of extraocular muscles, congenital, 1, 135700 (3)/Fibrosis of extraocular muscles, congenital, 3B, 135700 (3)                                                                                                                                                                                                                   |
| KIF22    | Spondyloepimetaphyseal dysplasia with joint laxity, type 2, 603546 (3)                                                                                                                                                                                                                                                                   |
| KIF4A    | Mental retardation, X-linked 100, 300923 (3)                                                                                                                                                                                                                                                                                             |
| KIF5A    | Spastic paraplegia 10, autosomal dominant, 604187 (3)                                                                                                                                                                                                                                                                                    |
| KIF5C    | Cortical dysplasia, complex, with other brain malformations 2, 615282 (3)                                                                                                                                                                                                                                                                |
| KIF7     | Acrocallosal syndrome, 200990 (3)/Hydroletharus syndrome 2, 614120 (3)/Joubert syndrome 12, 200990 (3)                                                                                                                                                                                                                                   |
| KIRREL3  | Mental retardation, autosomal dominant 4, 612581 (3)                                                                                                                                                                                                                                                                                     |
| KISS1    | Hypogonadotropic hypogonadism 13 with or without anosmia, 614842 (3)                                                                                                                                                                                                                                                                     |
| KISS1R   | Precocious puberty, central, 1, 176400 (3)/Hypogonadotropic hypogonadism 8 with or without anosmia, 614837 (3)                                                                                                                                                                                                                           |
| KIT      | Gastrointestinal stromal tumor, familial, 606764 (3)/Germ cell tumors, 273300 (3)/Leukemia, acute myeloid, 601626 (3)/Mast cell disease, 154800 (3)/Piebaldism, 172800 (3)                                                                                                                                                               |
| KITLG    | Hyperpigmentation, familial progressive, 2, 145250 (3)/[Skin/hair/eye pigmentation 7, blond/brown hair], 611664 (3)                                                                                                                                                                                                                      |
| KL       | Tumoral calcinosis, hyperphosphatemic, 211900 (3)/Coronary artery disease, susceptibility to (3)                                                                                                                                                                                                                                         |
| KLF1     | Blood group-Lutheran inhibitor, 111150 (3)/Dyserythropoietic anemia, congenital, type IV, 613673 (3)/[Hereditary persistence of fetal hemoglobin], 613566 (3)                                                                                                                                                                            |
| KLF11    | Maturity-onset diabetes of the young, type VII, 610508 (3)                                                                                                                                                                                                                                                                               |
| KLF6     | Gastric cancer, somatic, 613659 (3)/Prostate cancer, somatic, 176807 (3)                                                                                                                                                                                                                                                                 |
| KLF8     | Intellectual disability, absent speech & behavioural problems                                                                                                                                                                                                                                                                            |
| KLHDC8B  | Hodgkin lymphoma, susceptibility to, 246000 (3)                                                                                                                                                                                                                                                                                          |
| KLHL3    | Pseudohypoaldosteronism, type IID, 614495 (3)                                                                                                                                                                                                                                                                                            |
| KLHL7    | Retinitis pigmentosa 42, 612943 (3)                                                                                                                                                                                                                                                                                                      |
| KLK4     | Amelogenesis imperfecta, type IIA1, 204700 (3)                                                                                                                                                                                                                                                                                           |
| KLKB1    | Fletcher factor deficiency, 612423 (3)                                                                                                                                                                                                                                                                                                   |
| KMT2A    | Leukemia, myeloid/lymphoid or mixed-lineage 159555 (3)/Wiedemann-Steiner syndrome 605130 (3)                                                                                                                                                                                                                                             |
| KMT2D    | Kabuki syndrome 1 147920 (3)                                                                                                                                                                                                                                                                                                             |
| KRAS     | Bladder cancer, somatic, 109800 (3)/Breast cancer, somatic, 114480 (3)/Cardiofaciocutaneous syndrome 2, 615278 (3)/Gastric cancer, somatic, 137215 (3)/Leukemia, acute myelogenous (3)/Lung cancer, somatic, 211980 (3)/Noonan syndrome 3, 609942 (3)/Pancreatic carcinoma, somatic, 260350 (3)/SFM syndrome, somatic mosaic, 163200 (3) |
| KRIT1    | Cerebral cavernous malformations                                                                                                                                                                                                                                                                                                         |
| KRT1     | Epidermolytic hyperkeratosis, 113800 (3)/Ichthyosis hystrix, Curth-Macklin type, 146590 (3)/Ichthyosis, cyclic, with epidermolytic hyperkeratosis, 607602 (3)/Keratosis palmoplantaris striata III, 607654 (3)/Palmoplantar keratoderma, epidermolytic, 144200 (3)/Palmoplantar keratoderma, nonepidermolytic, 600962 (3)                |
| KRT10    | Epidermolytic hyperkeratosis, 113800 (3)/Ichthyosis with confetti, 609165 (3)/Ichthyosis, cyclic, with epidermolytic hyperkeratosis, 607602 (3)                                                                                                                                                                                          |
| KRT12    | Meesmann corneal dystrophy, 122100 (3)                                                                                                                                                                                                                                                                                                   |

KRT13 White sponge nevus 2, 615785 (3)  
 Dermatopathia pigmentosa reticularis, 125595 (3)/Epidermolysis bullosa simplex, Dowling-Meara type, 131760 (3)/Epidermolysis bullosa simplex, Koebner type, 131900 (3)/Epidermolysis bullosa simplex, Weber-Cockayne type, 131800 (3)/Epidermolysis bullosa simplex, recessive 1, 601001 (3)/Naegeli-Franceschetti-Jadassohn syndrome, 161000 (3)

KRT14

KRT16 Pachyonychia congenita 1, 167200 (3)/Palmoplantar keratoderma, nonepidermolytic, focal, 613000 (3)

KRT17 Pachyonychia congenita 2, 167210 (3)/Steatocystoma multiplex, 184500 (3)

KRT2 Ichthyosis bullosa of Siemens 146800 (3)

KRT3 Meesmann corneal dystrophy, 122100 (3)

KRT4 White sponge nevus 1, 193900 (3)  
 Dowling-Degos disease 1, 179850 (3)/Epidermolysis bullosa simplex, Dowling-Meara type, 131760 (3)/Epidermolysis bullosa simplex, Koebner type, 131900 (3)/Epidermolysis bullosa simplex, Weber-Cockayne type, 131800 (3)/Epidermolysis bullosa simplex, recessive 1, 601001 (3)/Epidermolysis bullosa simplex-MP, 131960 (3)/Epidermylysis bullosa simplex-MCR, 609352 (3)

KRT5

KRT6A Pachyonychia congenita 3, 615726 (3)

KRT6B Pachyonychia congenita 4, 615728 (3)

KRT74 Ectodermal dysplasia 7, hair/nail type, 614929 (3)/

KRT81 Monilethrix, 158000 (3)

KRT83 Monilethrix, 158000 (3)

KRT85 Ectodermal dysplasia 4, hair/nail type, 602032 (3)

KRT86 Monilethrix, 158000 (3)

KRT9 Palmoplantar keratoderma, epidermolytic, 144200 (3)  
 CRASH syndrome, 303350 (3)/Corpus callosum, partial agenesis of, 304100 (3)/Hydrocephalus due to aqueductal stenosis, 307000 (3)/Hydrocephalus with Hirschsprung disease, 307000 (3)/Hydrocephalus with congenital idiopathic intestinal pseudoobstruction, 307000 (3)/MASA syndrome, 303350 (3)

L1CAM

L2HGDH L-2-hydroxyglutaric aciduria, 236792 (3)

LAMA1 Poretti-Boltshauser syndrome, 615960 (3)

LAMA2 Muscular dystrophy, congenital merosin-deficient, 607855 (3)/Muscular dystrophy, congenital, due to partial LAMA2 deficiency, 607855 (3)

LAMA3 Epidermolysis bullosa, generalized atrophic benign, 226650 (3)/Epidermolysis bullosa, junctional, Herlitz type, 226700 (3)/Laryngoonychocutaneous syndrome, 245660 (3)

LAMA4 Cardiomyopathy, dilated, 1JJ, 615235 (3)

LAMB1 Lissencephaly 5, 615191 (3)

LAMB2 Nephrotic syndrome, type 5, with or without ocular abnormalities, 614199 (3)/Pierson syndrome, 609049 (3)

LAMB3 Amelogenesis imperfecta, type IA, 104530 (3)/Epidermolysis bullosa, junctional, Herlitz type, 226700 (3)/Epidermolysis bullosa, junctional, non-Herlitz type, 226650 (3)

LAMC2 Epidermolysis bullosa, junctional, Herlitz type, 226700 (3)/Epidermolysis bullosa, junctional, non-Herlitz type, 226650 (3)

LAMC3 Cortical malformations, occipital, 614115 (3)

LAMP2 Danon disease, 300257 (3)

LAMTOR2 Immunodeficiency due to defect in MAPBP-interacting protein, 610798 (3)

LARGE Muscular dystrophy-dystroglycanopathy (congenital with brain and eye anomalies), type A, 6, 613154 (3)/Muscular dystrophy-dystroglycanopathy (congenital with mental retardation), type B, 6, 608840 (3)

LARP7 Alazami syndrome, 615071 (3)

LBR Reynolds syndrome, 613471 (3)/Greenberg skeletal dysplasia, 215140 (3)/Pelger-Huet anomaly, 169400 (3)

LCA5 Leber congenital amaurosis 5, 604537 (3)

LCAT Fish-eye disease, 136120 (3)/Norum disease, 245900 (3)

LCT Lactase deficiency, congenital, 223000 (3)

LDB3 Cardiomyopathy, dilated 1C, 601493 (3)/Left ventricular noncompaction 3, with or without dilated cardiomyopathy, 601493 (3)/Myopathy, myofibrillar, 4, 609452 (3)

LDHA Glycogen storage disease XI, 612933 (3)

LDHB Lactate dehydrogenase-B deficiency, 614128 (3)

LDLR Hypercholesterolemia, familial 143890 (3)/LDL cholesterol level QTL2 143890 (3)

LDLRAP1 Hypercholesterolemia, familial, autosomal recessive, 603813 (3)

|         |                                                                                                                                                                                                                                                                                                                                                                                                                                                                                                                                                      |
|---------|------------------------------------------------------------------------------------------------------------------------------------------------------------------------------------------------------------------------------------------------------------------------------------------------------------------------------------------------------------------------------------------------------------------------------------------------------------------------------------------------------------------------------------------------------|
| LEMD3   | Buschke-Ollendorff syndrome, 166700 (3)/Melorheostosis with osteopoikilosis, 155950 (3)/Osteopoikilosis, 166700 (3)                                                                                                                                                                                                                                                                                                                                                                                                                                  |
| LEP     | Obesity, morbid, due to leptin deficiency, 614962 (3)                                                                                                                                                                                                                                                                                                                                                                                                                                                                                                |
| LEPR    | Obesity, morbid, due to leptin receptor deficiency, 614963 (3)                                                                                                                                                                                                                                                                                                                                                                                                                                                                                       |
| LEPRE1  | Osteogenesis imperfecta, non-lethal                                                                                                                                                                                                                                                                                                                                                                                                                                                                                                                  |
| LEPREL1 | High myopia                                                                                                                                                                                                                                                                                                                                                                                                                                                                                                                                          |
| LFNG    | Spondylocostal dysostosis 3, autosomal recessive, 609813 (3)                                                                                                                                                                                                                                                                                                                                                                                                                                                                                         |
| LGI1    | Epilepsy, familial temporal lobe, 1, 600512 (3)                                                                                                                                                                                                                                                                                                                                                                                                                                                                                                      |
| LHB     | Male pseudohermaphroditism due to defective LH (1)/Hypogonadism, hypergonadotropic (3)                                                                                                                                                                                                                                                                                                                                                                                                                                                               |
| LHCGR   | Leydig cell adenoma, somatic, with precocious puberty, 176410 (3)/Leydig cell hypoplasia with hypergonadotropic hypogonadism, 238320 (3)/Leydig cell hypoplasia with pseudohermaphroditism, 238320 (3)/Luteinizing hormone resistance, female, 238320 (3)/Precocious puberty, male, 176410 (3)                                                                                                                                                                                                                                                       |
| LHFPL5  | Deafness, autosomal recessive 67, 610265 (3)                                                                                                                                                                                                                                                                                                                                                                                                                                                                                                         |
| LHX3    | Pituitary hormone deficiency, combined, 3, 221750 (3)                                                                                                                                                                                                                                                                                                                                                                                                                                                                                                |
| LHX4    | Pituitary hormone deficiency, combined, 4, 262700 (3)                                                                                                                                                                                                                                                                                                                                                                                                                                                                                                |
| LIAS    | Pyruvate dehydrogenase lipoic acid synthetase deficiency, 614462 (3)                                                                                                                                                                                                                                                                                                                                                                                                                                                                                 |
| LIFR    | Stuve-Wiedemann syndrome/Schwartz-Jampel type 2 syndrome, 601559 (3)                                                                                                                                                                                                                                                                                                                                                                                                                                                                                 |
| LIG4    | LIG4 syndrome, 606593 (3)/Multiple myeloma, resistance to, 254500 (3)                                                                                                                                                                                                                                                                                                                                                                                                                                                                                |
| LINS    | Intellectual disability                                                                                                                                                                                                                                                                                                                                                                                                                                                                                                                              |
| LIPA    | Cholesteryl ester storage disease, 278000 (3)/Wolman disease, 278000 (3)                                                                                                                                                                                                                                                                                                                                                                                                                                                                             |
| LIPC    | Hepatic lipase deficiency, 614025 (3)/[High density lipoprotein cholesterol level QTL 12], 612797 (3)/Diabetes mellitus, noninsulin-dependent, 125853 (3)                                                                                                                                                                                                                                                                                                                                                                                            |
| LIPH    | Hypotrichosis 7, 604379 (3)/Woolly hair, autosomal recessive 2 with or without hypotrichosis, 604379 (3)                                                                                                                                                                                                                                                                                                                                                                                                                                             |
| LIPN    | Ichthyosis, congenital, autosomal recessive 8, 613943 (3)                                                                                                                                                                                                                                                                                                                                                                                                                                                                                            |
| LITAF   | Charcot-Marie-Tooth disease, type 1C, 601098 (3)                                                                                                                                                                                                                                                                                                                                                                                                                                                                                                     |
| LMAN1   | Combined factor V and VIII deficiency, 227300 (3)                                                                                                                                                                                                                                                                                                                                                                                                                                                                                                    |
| LMBR1   | Acheiropody, 200500 (3)/Hypoplastic or aplastic tibia with polydactyly, 188740 (3)/Laurin-Sandrow syndrome, 135750 (3)/Polydactyly, preaxial type II, 174500 (3)/Syndactyly, type IV, 186200 (3)/Triphalangeal thumb, type I, 174500 (3)/Triphalangeal thumb-polysyndactyly syndrome, 174500 (3)                                                                                                                                                                                                                                                     |
| LMBRD1  | Methylmalonic aciduria and homocystinuria, cblF type, 277380 (3)                                                                                                                                                                                                                                                                                                                                                                                                                                                                                     |
| LMF1    | Lipase deficiency, combined, 246650 (3)                                                                                                                                                                                                                                                                                                                                                                                                                                                                                                              |
| LMNA    | Cardiomyopathy, dilated, 1A, 115200 (3)/Charcot-Marie-Tooth disease, type 2B1, 605588 (3)/Emery-Dreifuss muscular dystrophy 2, AD, 181350 (3)/Emery-Dreifuss muscular dystrophy 3, AR, 181350 (3)/Heart-hand syndrome, Slovenian type, 610140 (3)/Hutchinson-Gilford progeria, 176670 (3)/Lipodystrophy, familial partial, 2, 151660 (3)/Malouf syndrome, 212112 (3)/Mandibuloacral dysplasia, 248370 (3)/Muscular dystrophy, congenital, 613205 (3)/Muscular dystrophy, limb-girdle, type 1B, 159001 (3)/Restrictive dermopathy, lethal, 275210 (3) |
| LMNB1   | Leukodystrophy, adult-onset, autosomal dominant, 169500 (3)                                                                                                                                                                                                                                                                                                                                                                                                                                                                                          |
| LMX1B   | Nail-patella syndrome, 161200 (3)                                                                                                                                                                                                                                                                                                                                                                                                                                                                                                                    |
| LOR     | Vohwinkel syndrome with ichthyosis, 604117 (3)                                                                                                                                                                                                                                                                                                                                                                                                                                                                                                       |
| LOXHD1  | Deafness, autosomal recessive 77, 613079 (3)                                                                                                                                                                                                                                                                                                                                                                                                                                                                                                         |
| LPA     | [LPA deficiency, congenital] (3)/Coronary artery disease, susceptibility to (1)                                                                                                                                                                                                                                                                                                                                                                                                                                                                      |
| LPAR6   | Hypotrichosis 8, 278150 (3)/Woolly hair, autosomal recessive 1, with or without hypotrichosis, 278150 (3)                                                                                                                                                                                                                                                                                                                                                                                                                                            |
| LPIN1   | Myoglobinuria, acute recurrent, autosomal recessive, 268200 (3)                                                                                                                                                                                                                                                                                                                                                                                                                                                                                      |
| LPIN2   | Majeed syndrome, 609628 (3)                                                                                                                                                                                                                                                                                                                                                                                                                                                                                                                          |
| LPL     | Combined hyperlipidemia, familial, 144250 (3)/Lipoprotein lipase deficiency, 238600 (3)/[High density lipoprotein cholesterol level QTL 11] (3)                                                                                                                                                                                                                                                                                                                                                                                                      |
| LPP     | Leukemia, acute myeloid, 601626 (3)/Lipoma (3)                                                                                                                                                                                                                                                                                                                                                                                                                                                                                                       |
| LRAT    | Leber congenital amaurosis 14, 613341 (3)/Retinal dystrophy, early-onset severe, 613341 (3)/Retinitis pigmentosa, juvenile, 613341 (3)                                                                                                                                                                                                                                                                                                                                                                                                               |
| LRBA    | Immunodeficiency, common variable, 8, with autoimmunity, 614700 (3)                                                                                                                                                                                                                                                                                                                                                                                                                                                                                  |
| LRP1    | ?Keratosis pilaris atrophicans 604093 (3)                                                                                                                                                                                                                                                                                                                                                                                                                                                                                                            |
| LRP2    | Donnai-Barrow syndrome, 222448 (3)                                                                                                                                                                                                                                                                                                                                                                                                                                                                                                                   |
| LRP4    | Canani-Lenz syndactyly syndrome, 212780 (3)/Sclerosteosis 2, 614305 (3)                                                                                                                                                                                                                                                                                                                                                                                                                                                                              |

LRP5 Exudative vitreoretinopathy 4, 601813 (3)/Hyperostosis, endosteal, 144750 (3)/Osteopetrosis, autosomal dominant 1, 607634 (3)/Osteoporosis-pseudoglioma syndrome, 259770 (3)/Osteosclerosis, 144750 (3)/[Bone mineral density variability 1], 601884(3)/van Buchem disease, type 2, 607636 (3)/Osteoporosis, 166710 (3)

LRPPRC Leigh syndrome, French-Canadian type, 220111 (3)

LRRC6 Ciliary dyskinesia, primary, 19, 614935 (3)

LRRC8A Agammaglobulinemia 5, 613506 (3)

LRRK2 Parkinson disease 8, 607060 (3)

LRSAM1 Charcot-Marie-Tooth disease, axonal, type 2P, 614436 (3)

LRTOMT Deafness, autosomal recessive 63, 611451 (3)

LTBP2 Glaucoma 3, primary congenital, D, 613086 (3)/Microspherophakia and/or megalocornea, with ectopia lentis and with or without secondary glaucoma, 251750 (3)/Weill-Marchesani syndrome 3, recessive, 614819 (3)

LTBP3 Tooth agenesis, selective, 6, 613097 (3)

LTBP4 Cutis laxa, autosomal recessive, type IC, 613177 (3)

LTC4S Leukotriene C4 synthase deficiency, 614037 (1)

LYL1 Leukemia, T-cell acute lymphoblastoid (2)

LYST Chediak-Higashi syndrome, 214500 (3)

LYZ Amyloidosis, renal, 105200 (3)

LZTFL1 Bardet-Biedl syndrome 17, 615994 (3)

LZTS1 Esophageal squamous cell carcinoma, 133239 (3)

MAD1L1 Lymphoma, somatic (3)/Prostate cancer, somatic, 176807 (3)

MAF Cataract 21, multiple types, 610202 (3)

MAFB Multicentric carpotarsal osteolysis syndrome, 166300 (3)

MAGEL2 Prader-Willi-like syndrome, 615547 (3)

MAGT1 Immunodeficiency, X-linked, with magnesium defect, Epstein-Barr virus infection and neoplasia, 300853 (3)

MAK Retinitis pigmentosa 62, 614181 (3)

MAMLD1 Hypospadias 2, X-linked, 300758 (3)

MAN1B1 Mental retardation, autosomal recessive 15, 614202 (3)

MAN2B1 Mannosidosis, alpha-, types I and II, 248500 (3)

MANBA Mannosidosis, beta, 248510 (3)

MAOA Brunner syndrome, 300615 (3)

MAP2K1 Cardiofaciocutaneous syndrome 3, 615279 (3)

MAP2K2 Cardiofaciocutaneous syndrome 4, 615280 (3)

MAP3K1 46XY sex reversal 6, 613762 (3)

MAP3K8 Lung cancer, somatic, 211980 (3)

MAPK10 Hirschsprung disease, modifier of  
Dementia, frontotemporal, with or without parkinsonism, 600274 (3)/Pick disease, 172700 (3)/Supranuclear palsy, progressive atypical, 260540 (3)/Supranuclear palsy, progressive, 601104 (3)/Parkinson disease, susceptibility to, 168600 (3)

MAPT

MARVELD2 Deafness, autosomal recessive 49, 610153 (3)

MASP1 3MC syndrome 1, 257920 (3)

MASP2 MASP2 deficiency, 613791 (3)

MASTL Thrombocytopenia-2, 188000 (3)

MAT1A Hypermethioninemia, persistent, autosomal dominant, due to methionine adenosyltransferase I/III deficiency, 250850 (3)/Methionine adenosyltransferase deficiency, autosomal recessive, 250850 (3)

MATN3 Epiphyseal dysplasia, multiple, 5, 607078 (3)/Spondyloepimetaphyseal dysplasia, 608728 (3)/Osteoarthritis susceptibility 2, 140600 (3)

MATR3 Amyotrophic lateral sclerosis 21, 606070 (3)

MBD5 Mental retardation, autosomal dominant 1, 156200 (3)

MBTPS2 Olmsted syndrome, X-linked, 300918 (3)/IFAP syndrome with or without BRESHECK syndrome, 308205 (3)/Keratosis follicularis spinulosa decalvans, X-linked, 308800 (3)

MC1R [Analgesia from kappa-opioid receptor agonist, female-specific], 613098 (3)/[Skin/hair/eye pigmentation 2, blond hair/fair skin], 266300 (3)/[Skin/hair/eye pigmentation 2, red hair/fair skin], 266300 (3)/Albinism, oculocutaneous, type II, modifier of, 203200 (3)/Melanoma, cutaneous malignant, 5, 613099 (3)/UV-induced skin damage, 266300 (3)

MC2R Glucocorticoid deficiency, due to ACTH unresponsiveness, 202200 (3)

MC4R Obesity, autosomal dominant, 601665 (3)

MCCC1 3-Methylcrotonyl-CoA carboxylase 1 deficiency, 210200 (3)

MCCC2 3-Methylcrotonyl-CoA carboxylase 2 deficiency, 210210 (3)

MCEE Methylmalonyl-CoA epimerase deficiency, 251120 (3)

MCFD2 Factor V and factor VIII, combined deficiency of, 613625 (3)

MCM4 Natural killer cell and glucocorticoid deficiency with DNA repair defect, 609981 (3)

MCM6 Lactase persistence/nonpersistence, 223100 (3)

MCOLN1 Mucopolipidosis IV, 252650 (3)

MCPH1 Microcephaly 1, primary, autosomal recessive, 251200 (3)

MECP2 Angelman syndrome, 105830 (3)/Encephalopathy, neonatal severe, 300673 (3)/Mental retardation, X-linked syndromic, Lubs type, 300260 (3)/Mental retardation, X-linked, syndromic 13, 300055 (3)/Rett syndrome, 312750 (3)/Rett syndrome, preserved speech variant, 312750 (3)/Autism susceptibility, X-linked 3, 300496 (3)

MED12 Lujan-Fryns syndrome, 309520 (3)/Ohdo syndrome, X-linked, 300895 (3)/Opitz-Kaveggia syndrome, 305450 (3)

MED13L Transposition of the great arteries, dextro-looped 1, 608808 (3)

MED17 Microcephaly, postnatal progressive, with seizures and brain atrophy, 613668 (3)

MED23 Mental retardation, autosomal recessive 18, 614249 (3)

MED25 Charcot-Marie-Tooth disease, type 2B2, 605589 (3)

MEF2C Chromosome 5q14.3 deletion syndrome, 613443 (4)/Mental retardation, stereotypic movements, epilepsy, and/or cerebral malformations, 613443 (3)

MEFV Familial Mediterranean fever, AD, 134610 (3)/Familial Mediterranean fever, AR, 249100 (3)

MEGF10 Myopathy, areflexia, respiratory distress, and dysphagia, early-onset, 614399 (3)/Myopathy, areflexia, respiratory distress, and dysphagia, early-onset, mild variant, 614399 (3)

MEN1 Adrenal adenoma, somatic (3)/Angiofibroma, somatic (3)/Carcinoid tumor of lung (3)/Lipoma, somatic (3)/Multiple endocrine neoplasia 1, 131100 (3)/Parathyroid adenoma, somatic (3)

MERTK Retinitis pigmentosa 38, 613862 (3)

MESP2 Spondylocostal dysostosis 2, autosomal recessive, 608681 (3)

MET Hepatocellular carcinoma, childhood type, 114550 (3)/Renal cell carcinoma, papillary, 1, familial and somatic, 605074 (3)

MFN2 Charcot-Marie-Tooth disease, type 2A2, 609260 (3)/Hereditary motor and sensory neuropathy VI, 601152 (3)

MFRP Microphthalmia, isolated 5, 611040 (3)/Nanophthalmos 2, 609549 (3)

MFSD8 Ceroid lipofuscinosis, neuronal, 7, 610951 (3)/Macular dystrophy with central cone involvement, 616170 (3)

MGAT2 Congenital disorder of glycosylation, type IIa, 212066 (3)

MGP Keutel syndrome, 245150 (3)

MIB1 Left ventricular noncompaction 7, 615092 (3)

MID1 Opitz GBBB syndrome, type I 300000 (3)

MIF Rheumatoid arthritis, systemic juvenile, susceptibility to, 604302 (3)

MINPP1 Thyroid carcinoma, follicular, 188470 (3)

MIPOL1 Craniofacial/acallosal CNS midline defects

MITF Tietz albinism-deafness syndrome, 103500 (3)/Waardenburg syndrome, type 2A, 193510 (3)/Waardenburg syndrome/ocular albinism, digenic, 103470 (3)/Melanoma, cutaneous malignant, susceptibility to, 8, 614456 (3)

MKKS Bardet-Biedl syndrome 6, 605231 (3)/McKusick-Kaufman syndrome, 236700 (3)

MKS1 Bardet-Biedl syndrome 13, 615990 (3)/Meckel syndrome 1, 249000 (3)

MLC1 Megalencephalic leukoencephalopathy with subcortical cysts, 604004 (3)

MLF1 Leukemia, acute myeloid, 601626 (1)

MLH1 Colorectal cancer, hereditary nonpolyposis, type 2, 609310 (3)/Mismatch repair cancer syndrome, 276300 (3)/Muir-Torre syndrome, 158320 (3)

MLH3 Colorectal cancer, hereditary nonpolyposis, type 7, 614385 (3)/Colorectal cancer, somatic, 114500 (3)/Endometrial cancer, susceptibility to, 608089 (3)

MLL Wiedemann-Steiner syndrome

MLL2 Kabuki syndrome

MLLT10 Leukemia, acute myeloid 601626 (3)

MLLT3 Neuromotor dev. delay, cerebellar ataxia, epilepsy

MLPH Griscelli syndrome, type 3, 609227 (3)

MLYCD Malonyl-CoA decarboxylase deficiency, 248360 (3)

MMAA Methylmalonic aciduria, vitamin B12-responsive, 251100 (3)

MMAB Methylmalonic aciduria, vitamin B12-responsive, due to defect in synthesis of adenosylcobalamin, cblB complementation type, 251110 (3)

MMACHC Methylmalonic aciduria and homocystinuria, cblC type, 277400 (3)

MMADHC Homocystinuria, cblD type

MMP1 COPD, rate of decline of lung function in, 606963 (3)/Epidermolysis bullosa dystrophica, autosomal recessive, modifier of, 226600 (3)

MMP13 Metaphyseal anadysplasia 1, 602111 (3)/Spondyloepimetaphyseal dysplasia, Missouri type, 602111 (3)

MMP2 Multicentric osteolysis, nodulosis, and arthropathy, 259600 (3)

MMP20 Amelogenesis imperfecta, type IIA2, 612529 (3)

MMP9 Metaphyseal anadysplasia 2, 613073 (3)

MN1 Meningioma, 607174 (3)

MXN1 Currarino syndrome, 176450 (3)

MOCS1 Molybdenum cofactor deficiency A, 252150 (3)

MOCS2 Molybdenum cofactor deficiency B, 252160 (3)

MOG Narcolepsy 7, 614250 (3)

MOGS Congenital disorder of glycosylation, type IIb, 606056 (3)

MPDU1 Congenital disorder of glycosylation, type If, 609180 (3)

MPI Congenital disorder of glycosylation, type Ib, 602579 (3)

MPL Myelofibrosis with myeloid metaplasia, somatic, 254450 (3)/Thrombocythemia 2, 601977 (3)/Thrombocytopenia, congenital amegakaryocytic, 604498 (3)

MPLKIP Trichothiodystrophy, nonphotosensitive 1, 234050 (3)

MPO Myeloperoxidase deficiency, 254600 (3)/Alzheimer disease, susceptibility to, 104300 (3)/Lung cancer, protection against, in smokers (3)

MPV17 Mitochondrial DNA depletion syndrome 6 (hepatocerebral type), 256810 (3)

MPZ Charcot-Marie-Tooth disease, dominant intermediate D, 607791 (3)/Charcot-Marie-Tooth disease, type 1B, 118200 (3)/Charcot-Marie-Tooth disease, type 2I, 607677 (3)/Charcot-Marie-Tooth disease, type 2J, 607736 (3)/Dejerine-Sottas disease, 145900 (3)/Neuropathy, congenital hypomyelinating, 605253 (3)/Roussy-Levy syndrome, 180800 (3)

MRAP Glucocorticoid deficiency 2, 607398 (3)

MRE11A Ataxia-telangiectasia-like disorder, 604391 (3)

MRPL3 Combined oxidative phosphorylation deficiency 9, 614582 (3)

MRPS16 Combined oxidative phosphorylation deficiency 2, 610498 (3)

MRPS22 Combined oxidative phosphorylation deficiency 5, 611719 (3)

MS4A1 Immunodeficiency, common variable, 5, 613495 (3)

MS4A2 {Atopy, susceptibility to}, 147050 (3)

MSH2 Colorectal cancer, hereditary nonpolyposis, type 1, 120435 (3)/Mismatch repair cancer syndrome, 276300 (3)/Muir-Torre syndrome, 158320 (3)

MSH6 Colorectal cancer, hereditary nonpolyposis, type 5, 614350 (3)/Endometrial cancer, familial, 608089 (3)/Mismatch repair cancer syndrome, 276300 (3)

MSR1 Barrett esophagus/esophageal adenocarcinoma, 614266 (3)/Prostate cancer, hereditary, 176807 (3)

MSRB3 Deafness, autosomal recessive 74, 613718 (3)

MSTN Muscle hypertrophy, gross

MSX1 Ectodermal dysplasia 3, Witkop type, 189500 (3)/Orofacial cleft 5, 608874 (3)/Tooth agenesis, selective, 1, with or without orofacial cleft, 106600 (3)

|        |                                                                                                                                                                                                                                                                       |
|--------|-----------------------------------------------------------------------------------------------------------------------------------------------------------------------------------------------------------------------------------------------------------------------|
| MSX2   | Craniosynostosis, type 2, 604757 (3)/Parietal foramina 1, 168500 (3)/Parietal foramina with cleidocranial dysplasia, 168550 (3)                                                                                                                                       |
| MTAP   | Diaphyseal medullary stenosis with malignant fibrous histiocytoma, 112250 (3)                                                                                                                                                                                         |
| MTFMT  | Combined oxidative phosphorylation deficiency 15, 614947 (3)                                                                                                                                                                                                          |
| MTHFR  | Homocystinuria due to MTHFR deficiency, 236250 (3)/Neural tube defects, susceptibility to, 601634 (3)/Schizophrenia, susceptibility to, 181500 (3)/Thromboembolism, susceptibility to, 188050 (3)/Vascular disease, susceptibility to (3)                             |
| MTM1   | Myotubular myopathy, X-linked, 310400 (3)                                                                                                                                                                                                                             |
| MTMR2  | Charcot-Marie-Tooth disease, type 4B1, 601382 (3)                                                                                                                                                                                                                     |
| MTO1   | Combined oxidative phosphorylation deficiency 10, 614702 (3)                                                                                                                                                                                                          |
| MTPAP  | Ataxia, spastic, 4, 613672 (3)                                                                                                                                                                                                                                        |
| MTR    | Homocystinuria-megaloblastic anemia, cblG complementation type, 250940 (3)/Neural tube defects, folate-sensitive, susceptibility to, 601634 (3)                                                                                                                       |
| MTRR   | Homocystinuria-megaloblastic anemia, cbl E type, 236270 (3)/Neural tube defects, folate-sensitive, susceptibility to, 601634 (3)                                                                                                                                      |
| MTTP   | Abetalipoproteinaemia                                                                                                                                                                                                                                                 |
| MUSK   | Myasthenic syndrome, congenital, associated with acetylcholine receptor deficiency, 608931 (3)                                                                                                                                                                        |
| MUT    | Methylmalonic aciduria, mut(0) type, 251000 (3)                                                                                                                                                                                                                       |
| MUTYH  | Adenomas, multiple colorectal, 608456 (3)/Colorectal adenomatous polyposis, autosomal recessive, with pilomatricomas, 132600 (3)/Gastric cancer, somatic, 613659 (3)                                                                                                  |
| MVK    | Hyper-IgD syndrome, 260920 (3)/Mevalonic aciduria, 610377 (3)/Porokeratosis 3, disseminated superficial actinic, 175900 (3)                                                                                                                                           |
| MYB    | T-cell acute lymphoblastic leukemia (3)                                                                                                                                                                                                                               |
| MYBPC1 | Arthrogryposis, distal, type 1B, 614335 (3)/Lethal congenital contracture syndrome 4, 614915 (3)                                                                                                                                                                      |
| MYBPC3 | Cardiomyopathy, dilated, 1MM, 615396 (3)/Cardiomyopathy, familial hypertrophic, 4, 115197 (3)/Left ventricular noncompaction 10, 615396 (3)                                                                                                                           |
| MYC    | Burkitt lymphoma, 113970 (3)                                                                                                                                                                                                                                          |
| MYCN   | Feingold syndrome, 164280 (3)                                                                                                                                                                                                                                         |
| MYD88  | Macroglobulinemia, Waldenstrom, somatic, 153600 (3)/Pyogenic bacterial infections, recurrent, due to MYD88 deficiency, 612260 (3)                                                                                                                                     |
| MYF6   | Myopathy, centronuclear, 3, 614408 (3)                                                                                                                                                                                                                                |
| MYH11  | Aortic aneurysm, familial thoracic 4, 132900 (3)                                                                                                                                                                                                                      |
| MYH14  | Peripheral neuropathy, myopathy, hoarseness, and hearing loss, 614369 (3)/Deafness, autosomal dominant 4A, 600652 (3)                                                                                                                                                 |
| MYH2   | Inclusion body myopathy-3, 605637 (3)                                                                                                                                                                                                                                 |
| MYH3   | Arthrogryposis, distal, type 2A, 193700 (3)/Arthrogryposis, distal, type 2B, 601680 (3)                                                                                                                                                                               |
| MYH6   | Atrial septal defect 3, 614089 (3)/Cardiomyopathy, dilated, 1EE, 613252 (3)/Cardiomyopathy, familial hypertrophic, 14, 613251 (3)/Sick sinus syndrome 3, 614090 (3)                                                                                                   |
| MYH7   | Cardiomyopathy, dilated, 1S, 613426 (3)/Cardiomyopathy, familial hypertrophic, 1, 192600 (3)/Laing distal myopathy, 160500 (3)/Left ventricular noncompaction 5, 613426 (3)/Myopathy, myosin storage, 608358 (3)/Scapuloperoneal syndrome, myopathic type, 181430 (3) |
| MYH8   | Carney complex variant, 608837 (3)/Trismus-pseudocamptodactyly syndrome, 158300 (3)                                                                                                                                                                                   |
| MYH9   | Deafness, autosomal dominant 17, 603622 (3)/Epstein syndrome, 153650 (3)/Fechtner syndrome, 153640 (3)/Macrothrombocytopenia and progressive sensorineural deafness, 600208 (3)/May-Hegglin anomaly, 155100 (3)/Sebastian syndrome, 605249 (3)                        |
| MYL2   | Cardiomyopathy, familial hypertrophic, 10, 608758 (3)                                                                                                                                                                                                                 |
| MYL3   | Cardiomyopathy, familial hypertrophic, 8, 608751 (3)                                                                                                                                                                                                                  |
| MYLK   | Aortic aneurysm, familial thoracic 7, 613780 (3)                                                                                                                                                                                                                      |
| MYLK2  | Cardiomyopathy, hypertrophic, midventricular, digenic, 192600 (3)                                                                                                                                                                                                     |
| MYO15A | Deafness, autosomal recessive 3, 600316 (3)                                                                                                                                                                                                                           |
| MYO1A  | Deafness, autosomal dominant 48, 607841 (3)                                                                                                                                                                                                                           |
| MYO1E  | Glomerulosclerosis, focal segmental, 6, 614131 (3)                                                                                                                                                                                                                    |
| MYO3A  | Deafness, autosomal recessive 30, 607101 (3)                                                                                                                                                                                                                          |
| MYO5A  | Griscelli syndrome, type 1, 214450 (3)                                                                                                                                                                                                                                |

MYO5B Microvillus inclusion disease, 251850 (3)  
 MYO6 Deafness, autosomal dominant 22, 606346 (3)/Deafness, autosomal dominant 22, with hypertrophic cardiomyopathy, 606346 (3)/Deafness, autosomal recessive 37, 607821 (3)  
 MYO7A Deafness, autosomal dominant 11, 601317 (3)/Deafness, autosomal recessive 2, 600060 (3)/Usher syndrome, type 1B, 276900 (3)  
 MYOC Glaucoma 1A, primary open angle, 137750 (3)  
 MYOT Muscular dystrophy, limb-girdle, type 1A, 159000 (3)/Myopathy, myofibrillar, 3, 609200 (3)/Myopathy, spheroid body, 182920 (3)  
 MYOZ2 Cardiomyopathy, familial hypertrophic, 16, 613838 (3)  
 MYPN Cardiomyopathy, dilated, 1KK, 615248 (3)/Cardiomyopathy, familial hypertrophic, 22, 615248 (3)/Cardiomyopathy, familial restrictive, 4, 615248 (3)  
 MYT1L Intellectual disability  
 NAA10 Microphthalmia, syndromic 1, 309800 (3)/N-terminal acetyltransferase deficiency, 300855 (3)  
 NAGA Kanzaki disease, 609242 (3)/Schindler disease, type I, 609241 (3)/Schindler disease, type III, 609241 (3)  
 NAGLU Mucopolysaccharidosis type IIIB (Sanfilippo B), 252920 (3)  
 NAGS N-acetylglutamate synthase deficiency, 237310 (3)  
 NAT8L N-acetylaspartate deficiency, 614063 (3)  
 NBAS Short stature, optic nerve atrophy, and Pelger-Huet anomaly, 614800 (3)  
 NBEAL2 Gray platelet syndrome, 139090 (3)  
 NBN Nijmegen breakage syndrome 251260/Leukemia, acute lymphoblastic 613065/Aplastic anemia 609135 (3)  
 NCF1 Chronic granulomatous disease due to deficiency of NCF-1, 233700 (3)  
 NCF2 Chronic granulomatous disease due to deficiency of NCF-2, 233710 (3)  
 NCF4 Granulomatous disease, chronic, autosomal recessive, cytochrome b-positive, type III, 613960 (3)  
 NCOA4 Thyroid carcinoma, papillary, 188550 (3)  
 NCSTN Acne inversa, familial, 1, 142690 (3)  
 NDE1 Microhydranencephaly, 605013 (3)/Lissencephaly 4 (with microcephaly), 614019 (3)  
 NDN Prader-Willi syndrome, 176270 (3)  
 NDP Exudative vitreoretinopathy 2, X-linked, 305390 (3)/Norrie disease, 310600 (3)  
 NDRG1 Charcot-Marie-Tooth disease, type 4D, 601455 (3)  
 NDST1 Mental retardation, autosomal recessive 46, 616116 (3)  
 NDUFA1 Mitochondrial complex I deficiency, 252010 (3)  
 NDUFA10 Leigh syndrome, 256000 (3)  
 NDUFA11 Mitochondrial complex I deficiency, 252010 (3)  
 NDUFA12 Leigh syndrome due to mitochondrial complex I deficiency, 256000 (3)  
 NDUFA2 Leigh syndrome due to mitochondrial complex I deficiency, 256000 (3)  
 NDUFA9 Leigh syndrome due to mitochondrial complex I deficiency, 256000 (3)  
 NDUFAF1 Mitochondrial complex I deficiency, 252010 (3)  
 NDUFAF2 Leigh syndrome, 256000 (3)/Mitochondrial complex I deficiency, 252010 (3)  
 NDUFAF3 Mitochondrial complex I deficiency, 252010 (3)  
 NDUFAF4 Mitochondrial complex I deficiency, 252010 (3)  
 NDUFAF5 Mitochondrial complex I deficiency 252010 (3)  
 NDUFAF6 Leigh syndrome due to mitochondrial complex I deficiency 256000 (3)  
 NDUFB3 Mitochondrial complex I deficiency, 252010 (3)  
 NDUFS1 Mitochondrial complex I deficiency, 252010 (3)  
 NDUFS2 Mitochondrial complex I deficiency, 252010 (3)  
 NDUFS3 Leigh syndrome due to mitochondrial complex I deficiency, 256000 (3)/Mitochondrial complex I deficiency, 252010 (3)  
 NDUFS4 Leigh syndrome, 256000 (3)/Mitochondrial complex I deficiency, 252010 (3)  
 NDUFS5 Complex I deficiency  
 NDUFS6 Complex I, mitochondrial respiratory chain, deficiency of, 252010 (3)  
 NDUFS7 Leigh syndrome, 256000 (3)  
 NDUFS8 Leigh syndrome due to mitochondrial complex I deficiency, 256000 (3)  
 NDUFV1 Mitochondrial complex I deficiency, 252010 (3)  
 NDUFV2 Mitochondrial complex I deficiency, 252010 (3)



NEB Nemaline myopathy 2, autosomal recessive, 256030 (3)

NEFL Charcot-Marie-Tooth disease, type 1F, 607734 (3)/Charcot-Marie-Tooth disease, type 2E, 607684 (3)

NEK1 Short-rib thoracic dysplasia 6 with or without polydactyly, 263520 (3)

NEK8 Nephronophthisis 9, 613824 (3)/

NELF Hypogonadotropic hypogonadism, idiopathic

NEU1 Sialidosis, type I, 256550 (3)/Sialidosis, type II, 256550 (3)

NEUROD1 Maturity-onset diabetes of the young 6, 606394 (3)/Diabetes mellitus, noninsulin-dependent, 125853 (3)

NEUROG3 Diarrhea 4, malabsorptive, congenital, 610370 (3)

NEXN Cardiomyopathy, dilated, 1CC, 613122 (3)/Cardiomyopathy, familial hypertrophic, 20, 613876 (3)

NF1 Leukemia, juvenile myelomonocytic, 607785 (3)/Neurofibromatosis, familial spinal, 162210 (3)/Neurofibromatosis, type 1, 162200 (3)/Neurofibromatosis Noonan syndrome, 601321 (3)/Watson syndrome, 193520 (3)

NF2 Meningioma, NF2-related, somatic, 607174 (3)/Neurofibromatosis, type 2, 101000 (3)/Schwannomatosis, 162091 (3)

NFIX Marshall-Smith syndrome, 602535 (3)/Sotos syndrome 2, 614753 (3)

NFKBIA Ectodermal dysplasia, anhidrotic, with T-cell immunodeficiency, 612132 (3)

NFU1 Multiple mitochondrial dysfunctions syndrome 1, 605711 (3)

NGF Neuropathy, hereditary sensory and autonomic, type V, 608654 (3)

NHEJ1 Severe combined immunodeficiency with microcephaly, growth retardation, and sensitivity to ionizing radiation, 611291 (3)

NHLRC1 Epilepsy, progressive myoclonic 2B (Lafora) 254780 (3)

NHP2 Dyskeratosis congenita

NHS Cataract 40, X-linked, 302200 (3)/Nance-Horan syndrome, 302350 (3)

NIN Seckel syndrome 7, 614851 (3)

NIPA1 Spastic paraplegia 6, autosomal dominant, 600363 (3)

NIPAL4 Ichthyosis, congenital, autosomal recessive 6, 612281 (3)

NIPBL Cornelia de Lange syndrome 1, 122470 (3)

NKX2-1 Chorea, hereditary benign, 118700 (3)/Choreoathetosis, hypothyroidism, and neonatal respiratory distress, 610978 (3)/Goiter, familial, due to TTF-1 defect (1)

NKX2-5 Atrial septal defect 7, with or without AV conduction defects, 108900 (3)/Conotruncal heart malformations, variable, 217095 (3)/Hypoplastic left heart syndrome 2, 614435 (3)/Hypothyroidism, congenital nongoitrous, 5, 225250 (3)/Tetralogy of Fallot, 187500 (3)/Ventricular septal defect 3, 614432 (3)

NKX2-6 Conotruncal heart malformations, 217095 (3)/Persistent truncus arteriosus, 217095 (3)

NKX3-2 Spondylo-megaepiphyseal-metaphyseal dysplasia, 613330 (3)

NLGN3 Asperger syndrome susceptibility, X-linked 1, 300494 (3)/Autism susceptibility, X-linked 1, 300425 (3)

NLGN4X Mental retardation

NLRP1 Corneal intraepithelial dyskeratosis and ectodermal dysplasia, 615225 (3)/Vitiligo-associated multiple autoimmune disease susceptibility 1, 606579 (3)

NLRP12 Familial cold autoinflammatory syndrome 2, 611762 (3)

NLRP3 CINCA syndrome, 607115 (3)/Familial cold-induced inflammatory syndrome 1, 120100 (3)/Muckle-Wells syndrome, 191900 (3)

NLRP7 Hydatidiform mole

NME1 Neuroblastoma, 256700 (3)

NME8 Ciliary dyskinesia, primary, 6, 610852 (3)

NMNAT1 Leber congenital amaurosis 9, 608553 (3)

NNT Glucocorticoid deficiency 4, 614736 (3)

NOBOX Premature ovarian failure 5, 611548 (3)

NOD2 Blau syndrome, 186580 (3)/Sarcoidosis, early-onset, 609464 (3)/Inflammatory bowel disease 1, 266600 (3)/Psoriatic arthritis, susceptibility to, 607507 (3)

NODAL Heterotaxy, visceral, 5, 270100 (3)

NOG Brachydactyly, type B2, 611377 (3)/Multiple synostoses syndrome 1, 186500 (3)/Stapes ankylosis with broad thumb and toes, 184460 (3)/Symphalangism, proximal, 185800 (3)/Tarsal-carpal coalition syndrome, 186570 (3)

NOL3 Myoclonus, familial cortical, 614937 (3)

NOP10 Dyskeratosis congenita, autosomal recessive 1 224230 (3)  
 NOP56 Spinocerebellar ataxia 36, 614153 (3)  
 NOTCH1 Adams-Oliver syndrome 5, 616028 (3)/Aortic valve disease 1, 109730 (3)  
 NOTCH2 Alagille syndrome 2, 610205 (3)/Hajdu-Cheney syndrome, 102500 (3)  
 NOTCH3 Myofibromatosis, infantile 2, 615293 (3)/Cerebral arteriopathy with subcortical infarcts and leukoencephalopathy, 125310 (3)  
  
 NPC1 Niemann-Pick disease, type C1, 257220 (3)/Niemann-Pick disease, type D, 257220 (3)/Nasopharyngeal carcinoma 1 (2)  
 NPC2 Niemann-pick disease, type C2, 607625 (3)  
 NPHP1 Joubert syndrome 4, 609583 (3)/Nephronophthisis 1, juvenile, 256100 (3)/Senior-Loken syndrome-1, 266900 (3)  
 NPHP3 Meckel syndrome 7, 267010 (3)/Nephronophthisis 3, 604387 (3)/Renal-hepatic-pancreatic dysplasia 1, 208540 (3)  
 NPHP4 Nephronophthisis 4, 606966 (3)/Senior-Loken syndrome 4, 606996 (3)  
 NPHS1 Nephrotic syndrome, type 1, 256300 (3)  
 NPHS2 Nephrotic syndrome, type 2 600995 (3)  
 NPM1 Leukemia, acute myeloid, 601626 (3)/Leukemia, acute promyelocytic, NPM/RARA type (3)  
 NPPA Atrial fibrillation, familial, 6, 612201 (3)/Atrial standstill 2, 615745 (3)  
 NPR2 Acromesomelic dysplasia, Maroteaux type, 602875 (3)/Epiphyseal chondrodysplasia, Miura type, 615923 (3)  
 NR0B1 Adrenal hypoplasia & hypogonadotrophic hypogonadism  
 NR0B2 Obesity, mild, early-onset, 601665 (3)  
 NR2E3 Enhanced S-cone syndrome, 268100 (3)/Retinitis pigmentosa 37, 611131 (3)  
 NR3C1 Glucocorticoid resistance, 615962 (3)  
 NR3C2 Hypertension, early-onset, autosomal dominant, with exacerbation in pregnancy, 605115 (3)/Pseudohypoaldosteronism type I, autosomal dominant, 177735 (3)  
 NR4A3 Chondrosarcoma, extraskeletal myxoid 612237 (3)  
 NR5A1 46XY sex reversal 3, 612965 (3)/Adrenocortical insufficiency (3)/Premature ovarian failure 7, 612964 (3)/Spermatogenic failure 8, 613957 (3)  
 NRAS Autoimmune lymphoproliferative syndrome type IV, 614470 (3)/Colorectal cancer, somatic, 114500 (3)/Epidermal nevus, somatic, 162900 (3)/Melanocytic nevus syndrome, congenital, somatic, 137550 (3)/Neurocutaneous melanosis, somatic, 249400 (3)/Noonan syndrome 6, 613224 (3)/Schimmelpenning-Feuerstein-Mims syndrome, somatic mosaic, 163200 (3)/Thyroid carcinoma, follicular, somatic, 188470 (3)  
 NRL Retinal degeneration, autosomal recessive, clumped pigment type (3)/Retinitis pigmentosa 27, 613750 (3)  
 NRTN Aganglionosis, in Hirschsprung disease  
 NRXN1 Pitt-Hopkins-like syndrome 2, 614325 (3)/Schizophrenia, susceptibility to, 17, 614332 (3)  
 NSD1 Beckwith-Wiedemann syndrome, 130650 (3)/Leukemia, acute myeloid, 601626 (1)/Sotos syndrome 1, 117550 (3)  
 NSDHL CHILD syndrome, 308050 (3)/CK syndrome, 300831 (3)  
 NSUN2 Mental retardation, autosomal recessive 5, 611091 (3)  
 NT5C3 Haemolytic anaemia  
 NT5C3A Anemia, hemolytic, due to UMPH1 deficiency 266120 (3)  
 NT5E Calcification of joints and arteries, 211800 (3)  
 NTF4 Glaucoma 1, open angle, 1O, 613100 (3)  
 NTNG1 Rett syndrome  
 NTRK1 Insensitivity to pain, congenital, with anhidrosis, 256800 (3)/Medullary thyroid carcinoma, familial, 155240 (3)  
 NTRK2 Obesity, hyperphagia, and developmental delay, 613886 (3)  
 NUBPL Mitochondrial complex I deficiency, 252010 (3)  
 NUP214 Leukemia, T-cell acute lymphoblastic (3)/Leukemia, acute myeloid, 601626 (3)  
 NUP62 Striatonigral degeneration, infantile, 271930 (3)  
 NYX Night blindness, congenital stationary (complete), 1A, X-linked, 310500 (3)  
 OAT Gyrate atrophy of choroid and retina with or without ornithinemia, 258870 (3)  
 OBSCN Glioblastoma  
 OBSL1 3-M syndrome 2, 612921 (3)

OCA2 Albinism, brown oculocutaneous, 203200 (3)/Albinism, oculocutaneous, type II, 203200 (3)/[Skin/hair/eye pigmentation 1, blond/brown hair], 227220 (3)/[Skin/hair/eye pigmentation 1, blue/nonblue eyes], 227220 (3)

OCLN Band-like calcification with simplified gyration and polymicrogyria, 251290 (3)

OCRL Dent disease 2, 300555 (3)/Lowe syndrome, 309000 (3)

OFD1 Retinitis pigmentosa 23, 300424 (3)/Joubert syndrome 10, 300804 (3)/Orofaciodigital syndrome I, 311200 (3)/Simpson-Golabi-Behmel syndrome, type 2, 300209 (3)

OGDH Alpha-ketoglutarate dehydrogenase deficiency, 203740 (1)

OGG1 Renal cell carcinoma, clear cell, somatic, 144700 (3)

OPA1 Optic atrophy 1, 165500 (3)/Optic atrophy plus syndrome, 125250 (3)/Glaucoma, normal tension, susceptibility to, 606657 (3)

OPA3 3-methylglutaconic aciduria, type III, 258501 (3)/Optic atrophy 3 with cataract, 165300 (3)

OPHN1 Mental retardation, X-linked, with cerebellar hypoplasia and distinctive facial appearance, 300486 (3)

OPLAH 5-oxoprolinase deficiency, 260005 (3)

OPN1LW Blue cone monochromacy, 303700 (3)/Colorblindness, protan, 303900 (3)

OPN1MW Blue cone monochromacy, 303700 (3)/Colorblindness, deutan, 303800 (3)

OPN1SW Colorblindness, tritan, 190900 (3)

OPTN Amyotrophic lateral sclerosis 12, 613435 (3)/Glaucoma 1, open angle, E, 137760 (3)/Glaucoma, normal tension, susceptibility to, 606657 (3)

ORAI1 Immunodeficiency 9, 612782 (3)/

ORC1 Meier-Gorlin syndrome 1, 224690 (3)

ORC4 Meier-Gorlin syndrome 2, 613800 (3)

ORC6 Meier-Gorlin syndrome 3, 613803 (3)

OSMR Amyloidosis, primary localized cutaneous, 1, 105250 (3)

OSTM1 Osteopetrosis, autosomal recessive 5, 259720 (3)

OTC Ornithine transcarbamylase deficiency, 311250 (3)

OTOA Deafness, autosomal recessive 22, 607039 (3)

OTOF Auditory neuropathy, autosomal recessive, 1, 601071 (3)/Deafness, autosomal recessive 9, 601071 (3)

OTOG Deafness, autosomal recessive 18B, 614945 (3)

OTOGL Deafness, autosomal recessive 84B, 614944 (3)

OTX2 Microphthalmia, syndromic 5, 610125 (3)/Pituitary hormone deficiency, combined, 6, 613986 (3)/Retinal dystrophy, early-onset, and pituitary dysfunction, 610125 (3)

OXCT1 Succinyl CoA:3-oxoacid CoA transferase deficiency, 245050 (3)

P2RY12 Bleeding disorder, platelet-type, 8, 609821 (3)

P4HB Cole-Carpenter syndrome 1 112240 (3)

PABPN1 Oculopharyngeal muscular dystrophy, 164300 (3)

PAFAH1B1 Lissencephaly 1, 607432 (3)/Subcortical laminar heterotopia, 607432 (3)

PAH Phenylketonuria, 261600 (3)/[Hyperphenylalaninemia, non-PKU mild], 261600 (3)

PAK3 Mental retardation, X-linked 30/47, 300558 (3)

PALB2 Fanconi anemia, complementation group N, 610832 (3)/Breast cancer, susceptibility to, 114480 (3)/Pancreatic cancer, susceptibility to, 3, 613348 (3)

PANK2 HARP syndrome, 607236 (3)/Neurodegeneration with brain iron accumulation 1, 234200 (3)

PAPSS2 Brachyolmia 4 with mild epiphyseal and metaphyseal changes, 612847 (3)

PARK2 Parkinson disease, early-onset

PARK7 Parkinson disease, autosomal recessive

PARP1 Intellectual disability

PAX2 Glomerulosclerosis, focal segmental, 7, 616002 (3)/Papillorenal syndrome, 120330 (3)/Renal hypoplasia, isolated, 191830 (3)

PAX3 Craniofacial-deafness-hand syndrome, 122880 (3)/Rhabdomyosarcoma 2, alveolar, 268220 (3)/Waardenburg syndrome, type 1, 193500 (3)/Waardenburg syndrome, type 3, 148820 (3)

PAX4 Diabetes mellitus, ketosis-prone, 612227 (3)/Diabetes mellitus, type 2, 125853 (3)/Maturity-onset diabetes of the young, type IX, 612225 (3)

PAX6 Morning glory disc anomaly, 120430 (3)/Aniridia, 106210 (3)/Cataract with late-onset corneal dystrophy, 106210 (3)/Coloboma of optic nerve, 120430 (3)/Coloboma, ocular, 120200 (3)/Foveal hypoplasia 1, 136520 (3)/Gillespie syndrome, 206700 (3)/Keratitis, 148190 (3)/Optic nerve hypoplasia, 165550 (3)/Peters anomaly, 604229 (3)

PAX7 Rhabdomyosarcoma 2, alveolar, 268220 (3)

PAX8 Hypothyroidism, congenital, due to thyroid dysgenesis or hypoplasia, 218700 (3)

PAX8-AS1 Hypothyroidism, congenital, due to thyroid dysgenesis or hypoplasia 218700 (3)

PAX9 Tooth agenesis, selective, 3, 604625 (3)

PBX1 Leukemia, acute pre-B-cell (2)

PC Pyruvate carboxylase deficiency, 266150 (3)

PCBD1 Hyperphenylalaninemia, BH4-deficient, D, 264070 (3)

PCCA Propionicacidemia, 606054 (3)

PCCB Propionicacidemia, 606054 (3)

PCDH15 Deafness, autosomal recessive 23, 609533 (3)/Usher syndrome, type 1D/F digenic, 601067 (3)/Usher syndrome, type 1F, 602083 (3)

PCDH19 Epileptic encephalopathy, early infantile, 9, 300088 (3)

PCK1 Phosphoenolpyruvate carboxykinase-1, cytosolic, deficiency, 261680 (1)

PCK2 PEPCK deficiency, mitochondrial, 261650 (1)

PCM1 Thyroid carcinoma, papillary, 188550 (3)

PCNT Microcephalic osteodysplastic primordial dwarfism, type II, 210720 (3)

PCSK1 Obesity with impaired prohormone processing, 600955 (3)/Obesity, susceptibility to, BMIQ12, 612362 (3)

PCSK9 Hypercholesterolemia, familial, 3, 603776 (3)/Low density lipoprotein cholesterol level QTL 1, 603776 (3)

PDCD10 Cerebral cavernous malformations 3, 603285 (3)

PDE11A Pigmented nodular adrenocortical disease, primary, 2, 610475 (3)

PDE4D Acrodysostosis 2, with or without hormone resistance, 614613 (3)/Stroke, susceptibility to, 1, 606799 (3)

PDE6A Retinitis pigmentosa 43, 613810 (3)

PDE6B Night blindness, congenital stationary, autosomal dominant 2, 163500 (3)/Retinitis pigmentosa-40, 613801 (3)

PDE6C Cone dystrophy 4, 613093 (3)

PDE6G Retinitis pigmentosa 57, 613582 (3)

PDE6H Achromatopsia 6, 610024 (3)/Retinal cone dystrophy 3, 610024 (3)

PDE8B Pigmented nodular adrenocortical disease, primary, 3, 614190 (3)/Striatal degeneration, autosomal dominant, 609161 (3)

PDGFB Basal ganglia calcification, idiopathic, 5, 615483 (3)/Dermatofibrosarcoma protuberans, 607907 (3)/Meningioma, SIS-related, 607174 (3)

PDGFRA Gastrointestinal stromal tumor, somatic, 606764 (3)/Hypereosinophilic syndrome, idiopathic, resistant to imatinib, 607685 (3)

PDGFRB Basal ganglia calcification, idiopathic, 4, 615007 (3)/Myeloproliferative disorder with eosinophilia, 131440 (4)/Myofibromatosis, infantile, 1, 228550 (3)

PDGFRL Colorectal cancer, somatic, 114500 (3)/Hepatocellular cancer, somatic, 114550 (3)

PDHA1 Pyruvate dehydrogenase E1-alpha deficiency, 312170 (3)

PDHB Pyruvate dehydrogenase E1-beta deficiency, 614111 (3)

PDHX Pyruvate dehydrogenase complex deficiency

PDLIM3 Cardiomyopathy, dilated

PDP1 Pyruvate dehydrogenase phosphatase deficiency, 608782 (3)

PDSS1 Coenzyme Q10 deficiency, primary, 2, 614651 (3)

PDSS2 Coenzyme Q10 deficiency, primary, 3, 614652 (3)

PDX1 Lacticacidemia due to PDX1 deficiency, 245349 (3)

PDYN Spinocerebellar ataxia 23, 610245 (3)

PDZD7 Usher syndrome, type IIC, GPR98/PDZD7 digenic, 605472 (3)/Retinal disease in Usher syndrome type IIA, modifier of, 276901 (3)

PECR Intellectual disability

PEPD Prolidase deficiency, 170100 (3)

PER2 Advanced sleep phase syndrome, familial, 1, 604348 (3)

PEX1 Peroxisome biogenesis disorder 1A (Zellweger), 214100 (3)/Peroxisome biogenesis disorder 1B (NALD/IRD), 601539 (3)  
 PEX10 Peroxisome biogenesis disorder 6A (Zellweger), 614870 (3)/Peroxisome biogenesis disorder 6B, 614871 (3)  
 PEX11B Peroxisome biogenesis disorder 14B, 614920 (3)  
 PEX12 Peroxisome biogenesis disorder 3A (Zellweger), 614859 (3)/Peroxisome biogenesis disorder 3B, 266510 (3)  
 PEX13 Peroxisome biogenesis disorder 11A (Zellweger), 614883 (3)/Peroxisome biogenesis disorder 11B, 614885 (3)  
 PEX14 Peroxisome biogenesis disorder 13A (Zellweger), 614887 (3)  
 PEX16 Peroxisome biogenesis disorder 8A, (Zellweger), 614876 (3)/Peroxisome biogenesis disorder 8B, 614877 (3)  
 PEX19 Peroxisome biogenesis disorder 12A (Zellweger), 614886 (3)  
 PEX2 Peroxisome biogenesis disorder 5A (Zellweger), 614866 (3)/Peroxisome biogenesis disorder 5B, 614867 (3)  
 PEX26 Peroxisome biogenesis disorder 7A (Zellweger), 614872 (3)/Peroxisome biogenesis disorder 7B, 614873 (3)  
 PEX3 Peroxisome biogenesis disorder 10A (Zellweger), 614882 (3)  
 PEX5 Peroxisome biogenesis disorder 2A (Zellweger), 214110 (3)/Peroxisome biogenesis disorder 2B, 202370 (3)  
 PEX6 Peroxisome biogenesis disorder 4A (Zellweger), 614862 (3)/Peroxisome biogenesis disorder 4B, 614863 (3)  
 PEX7 Peroxisome biogenesis disorder 9B, 614879 (3)/Rhizomelic chondrodysplasia punctata, type 1, 215100 (3)  
 PFKM Glycogen storage disease VII, 232800 (3)  
 PFN1 Amyotrophic lateral sclerosis 18, 614808 (3)  
 PGAM2 Glycogen storage disease X, 261670 (3)  
 PGK1 Phosphoglycerate kinase 1 deficiency, 300653 (3)  
 PGM1 Congenital disorder of glycosylation, type It, 614921 (3)  
 PGR Progesterone resistance, 264080 (2)  
 PHB Breast cancer, susceptibility to, 114480 (3)  
 PHEX Hypophosphatemic rickets, X-linked dominant, 307800 (3)  
 PHF6 Borjeson-Forsman-Lehmann syndrome, 301900 (3)  
 PHF8 Mental retardation syndrome, X-linked, Siderius type, 300263 (3)  
 PHGDH Neu-Laxova syndrome 1 256520 (3)/Phosphoglycerate dehydrogenase deficiency 601815 (3)  
 PHIP Glaucoma, primary congenital  
 PHKA1 Muscle glycogenosis, 300559 (3)  
 PHKA2 Glycogen storage disease, type IXa1, 306000 (3)/Glycogen storage disease, type IXa2, 306000 (3)  
 PHKB Phosphorylase kinase deficiency of liver and muscle, autosomal recessive, 261750 (3)  
 PHKG2 Cirrhosis due to liver phosphorylase kinase deficiency (3)/Glycogen storage disease IXc, 613027 (3)  
 PHOX2A Fibrosis of extraocular muscles, congenital, 2, 602078 (3)  
 PHOX2B Central hypoventilation syndrome, congenital, with or without Hirschsprung disease (3)  
 PHYH Refsum disease, 266500 (3)  
 PICALM Leukemia, acute T-cell lymphoblastic (3)/Leukemia, acute myeloid, 601626 (3)  
 PIGA Multiple congenital anomalies-hypotonia-seizures syndrome 2, 300868 (3)/Paroxysmal nocturnal hemoglobinuria, somatic, 300818 (3)  
 PIGL CHIME syndrome, 280000 (3)  
 PIGM Glycosylphosphatidylinositol deficiency, 610293 (3)  
 PIGN Multiple congenital anomalies-hypotonia-seizures syndrome 1, 614080 (3)  
 PIGO Hyperphosphatasia with mental retardation syndrome 2, 614749 (3)  
 PIGV Hyperphosphatasia with mental retardation syndrome 1, 239300 (3)  
 Breast cancer, somatic, 114480 (3)/CLOVE syndrome, somatic, 612918 (3)/Colorectal cancer, somatic, 114500 (3)/Cowden syndrome 5, 615108 (3)/Gastric cancer, somatic, 613659 (3)/Hepatocellular carcinoma, somatic, 114550 (3)/Keratosis, seborrheic, somatic, 182000 (3)/Megalencephaly-capillary malformation-polymicrogyria syndrome, somatic, 602501 (3)/Nevus, epidermal, somatic, 162900 (3)/Non-small cell lung cancer, somatic, 211980 (3)/Ovarian cancer, somatic, 167000 (3)  
 PIK3CA Megalencephaly-polymicrogyria-polydactyly-hydrocephalus syndrome 1, 603387 (3)  
 PIK3R2 Corneal fleck dystrophy, 121850 (3)  
 PIKFYVE Parkinson disease 6, early onset, 605909 (3)  
 PIP5K1C Lethal congenital contractural syndrome 3, 611369 (3)  
 PITPNM3 Cone-rod dystrophy 5, 600977 (3)  
 PITX1 Clubfoot, congenital, with or without deficiency of long bones and/or mirror-image polydactyly, 119800 (3)/Liebenberg syndrome, 186550 (4)

PITX2 Axenfeld-Rieger syndrome, type 1, 180500 (3)/Iridogoniodysgenesis, type 2, 137600 (3)/Peters anomaly, 604229 (3)/Ring dermoid of cornea, 180550 (3)

PITX3 Anterior segment mesenchymal dysgenesis, 107250 (3)/Cataract 11, multiple types, 610623 (3)/Cataract 11, syndromic, 610623 (3)

PKD1 Polycystic kidney disease, adult type I, 173900 (3)

PKD2 Polycystic kidney disease 2, 613095 (3)

PKHD1 Polycystic kidney disease

PKLR Adenosine triphosphate, elevated, of erythrocytes, 102900 (3)/Pyruvate kinase deficiency, 266200 (3)

PKP1 Ectodermal dysplasia/skin fragility syndrome, 604536 (3)

PKP2 Arrhythmogenic right ventricular dysplasia 9, 609040 (3)

PLA2G5 [Fleck retina, familial benign], 228980 (3)

PLA2G6 Infantile neuroaxonal dystrophy 1, 256600 (3)/Neurodegeneration with brain iron accumulation 2B, 610217 (3)/Parkinson disease 14, 612953 (3)

PLA2G7 Platelet-activating factor acetylhydrolase deficiency, 614278 (3)/Asthma, susceptibility to, 600807 (3)/Atopy, susceptibility to, 147050 (3)

PLAG1 Adenomas, salivary gland pleomorphic, 181030 (3)

PLAT Hyperfibrinolysis, familial, due to increased release of PLAT, 612348 (1)/Thrombophilia, familial, due to decreased release of PLAT, 612348 (1)

PLAU Quebec platelet disorder, 601709 (3)/Alzheimer disease, late-onset, susceptibility to, 104300 (3)

PLCB1 Epileptic encephalopathy, early infantile, 12, 613722 (3)

PLCB4 Auriculocondylar syndrome 2, 614669 (3)

PLCD1 Nail disorder, nonsyndromic congenital, 3, (leukonychia), 151600 (3)

PLCE1 Nephrotic syndrome, type 3, 610725 (3)

PLCG2 Autoinflammation, antibody deficiency, and immune dysregulation syndrome, 614878 (3)/Familial cold autoinflammatory syndrome 3, 614468 (3)

PLEC Muscular dystrophy with epidermolysis bullosa

PLEKHG4 Cerebellar ataxia, autosomal dominant

PLEKHG5 Charcot-Marie-Tooth disease, recessive intermediate C, 615376 (3)/Spinal muscular atrophy, distal, autosomal recessive, 4, 611067 (3)

PLEKHM1 Osteopetrosis, autosomal recessive 6, 611497 (3)

PLG Dysplasminogenemia, 217090 (3)/Plasminogen deficiency, type I, 217090 (3)

PLIN1 Lipodystrophy, familial partial, type 4, 613877 (3)

PLN Cardiomyopathy, dilated, 1P, 609909 (3)/Cardiomyopathy, familial hypertrophic, 18, 613874 (3)

PLOD1 Ehlers-Danlos syndrome, type VI, 225400 (3)

PLOD2 Bruck syndrome 2, 609220 (3)

PLOD3 Lysyl hydroxylase 3 deficiency, 612394 (3)

PLP1 Pelizaeus-Merzbacher disease, 312080 (3)/Spastic paraplegia 2, X-linked, 312920 (3)

PMM2 Congenital disorder of glycosylation, type Ia, 212065 (3)

PMP22 Charcot-Marie-Tooth disease, type 1A, 118220 (3)/Charcot-Marie-Tooth disease, type 1E, 118300 (3)/Dejerine-Sottas disease, 145900 (3)/Neuropathy, inflammatory demyelinating, 139393 (3)/Neuropathy, recurrent, with pressure palsies, 162500 (3)/Roussy-Levy syndrome, 180800 (3)

PMS2 Colorectal cancer, hereditary nonpolyposis, type 4, 614337 (3)/Mismatch repair cancer syndrome, 276300 (3)

PNKD Paroxysmal nonkinesigenic dyskinesia

PNKP Microcephaly, seizures, and developmental delay, 613402 (3)

PNLIP Pancreatic lipase deficiency, 614338 (1)

PNP Immunodeficiency due to purine nucleoside phosphorylase deficiency, 613179 (3)

PNPLA1 Ichthyosis, congenital, autosomal recessive 10, 615024 (3)

PNPLA2 Neutral lipid storage disease with myopathy, 610717 (3)

PNPLA6 Boucher-Neuhauser syndrome, 215470 (3)/Spastic paraplegia 39, autosomal recessive, 612020 (3)

PNPO Pyridoxamine 5'-phosphate oxidase deficiency, 610090 (3)

PNPT1 Combined oxidative phosphorylation deficiency 13, 614932 (3)/Deafness, autosomal recessive 70, 614934 (3)

POC1A Short stature, onychodysplasia, facial dysmorphism, and hypotrichosis, 614813 (3)

POF1B ?Premature ovarian failure 2B 300604 (3)

POLA1 N syndrome, 310465 (1)

Mitochondrial DNA depletion syndrome 4A (Alpers type), 203700 (3)/Mitochondrial DNA depletion syndrome 4B (MNGIE type), 613662 (3)/Mitochondrial recessive ataxia syndrome (includes SANDO and SCAE), 607459 (3)/Progressive external ophthalmoplegia, autosomal dominant, 157640 (3)/Progressive external ophthalmoplegia, autosomal recessive, 258450 (3)

POLG

Progressive external ophthalmoplegia with mitochondrial DNA deletions, autosomal dominant 4, 610131 (3)

POLG2

Xeroderma pigmentosum, variant type, 278750 (3)

POLH

Treacher Collins syndrome 3, 248390 (3)

POLR1C

Treacher Collins syndrome 2, 613717 (3)

POLR1D

Leukodystrophy, hypomyelinating, 7, with or without oligodontia and/or hypogonadotropic hypogonadism, 607694 (3)

POLR3A

Leukodystrophy, hypomyelinating, 8, with or without oligodontia and/or hypogonadotropic hypogonadism, 614381 (3)

POLR3B

Obesity, adrenal insufficiency, and red hair due to POMC deficiency, 609734 (3)/Obesity, early-onset, susceptibility to, 601665 (3)

POMC

Muscular dystrophy-dystroglycanopathy (congenital with brain and eye anomalies), type A, 3, 253280 (3)/Muscular dystrophy-dystroglycanopathy (congenital with mental retardation), type B, 3, 613151 (3)/Muscular dystrophy-dystroglycanopathy (limb-girdle), type C, 3, 613157 (3)

POMGNT1

Muscular dystrophy-dystroglycanopathy (congenital with brain and eye anomalies), type A, 8 614830 (3)

POMGNT2

Keratitis linearis with ichthyosis congenita and sclerosing keratoderma, 601952 (3)

POMP

Muscular dystrophy-dystroglycanopathy (congenital with brain and eye anomalies), type A, 1, 236670 (3)/Muscular dystrophy-dystroglycanopathy (congenital with mental retardation), type B, 1, 613155 (3)/Muscular dystrophy-dystroglycanopathy (limb-girdle), type C, 1, 609308 (3)

POMT1

Muscular dystrophy-dystroglycanopathy (congenital with brain and eye anomalies), type A, 2, 613150 (3)/Muscular dystrophy-dystroglycanopathy (congenital with mental retardation), type B, 2, 613156 (3)/Muscular dystrophy-dystroglycanopathy (limb-girdle), type C, 2, 613158 (3)

POMT2

Coronary artery disease, susceptibility to (3)/Coronary artery spasm 2, susceptibility to (3)/Microvascular complications of diabetes 5, 612633 (3)/Organophosphate poisoning, sensitivity to (3)

PON1

Antley-Bixler syndrome with genital anomalies and disordered steroidogenesis, 201750 (3)/Disordered steroidogenesis due to cytochrome P450 oxidoreductase, 613571 (3)

POR

Focal dermal hypoplasia, 305600 (3)

PORCN

Pituitary hormone deficiency, combined, 1, 613038 (3)

POU1F1

Deafness, X-linked 2, 304400 (3)

POU3F4

Deafness, autosomal dominant 15, 602459 (3)

POU4F3

Wilms tumor susceptibility-5, 601583 (3)

POU6F2

Carotid intimal medial thickness 1, 609338 (3)/Insulin resistance, severe, digenic, 604367 (3)/Lipodystrophy, familial partial, type 3, 604367 (3)/Obesity, severe, 601665 (3)/[Obesity, resistance to] (3)/Diabetes, type 2, 125853 (3)

PPARG

Osteogenesis imperfecta, type IX, 259440 (3)

PPIB

Breast cancer, 114480 (3)

PPM1D

Porphyria variegata, 176200 (3)

PPOX

Insulin resistance, severe, digenic, 604367 (3)

PPP1R3A

Lung cancer, 211980 (3)

PPP2R1B

Spinocerebellar ataxia 12, 604326 (3)

PPP2R2B

Mental retardation, autosomal dominant 35 616355 (3)

PPP2R5D

Ceroid lipofuscinosis, neuronal, 1, 256730 (3)

PPT1

Renpenning syndrome, 309500 (3)

PQBP1

Renal cell carcinoma, papillary, 605074 (3)

PRCC

Retinitis pigmentosa 36 610599 (3)

PRCD

Brittle cornea syndrome 2, 614170 (3)

PRDM5

Hemophagocytic lymphohistiocytosis, familial, 2, 603553 (3)/Lymphoma, non-Hodgkin, 605027 (3)

PRF1

Camptodactyly-arthropathy-coxa vara-pericarditis syndrome, 208250 (3)

PRG4

Epilepsy, progressive myoclonic 1B, 612437 (3)

PRICKLE1

Epilepsy, progressive myoclonic 5, 613832 (3)

PRICKLE2

PRKAG2 Cardiomyopathy, familial hypertrophic 6, 600858 (3)/Glycogen storage disease of heart, lethal congenital, 261740 (3)/Wolff-Parkinson-White syndrome, 194200 (3)

PRKAR1A Acrodysostosis 1, with or without hormone resistance, 101800 (3)/Adrenocortical tumor, somatic, (3)/Carney complex, type 1, 160980 (3)/Myxoma, intracardiac, 255960 (3)/Pigmented nodular adrenocortical disease, primary, 1, 610489 (3)/Thyroid carcinoma, papillary, somatic, 188550 (3)

PRKCA Pituitary tumor, invasive (3)

PRKCG Spinocerebellar ataxia 14, 605361 (3)

PRKCSH Polycystic liver disease, 174050 (3)

PRKDC Immunodeficiency 16, with or without neurologic abnormalities, 615966 (3)

PRKRA Dystonia 16, 612067 (3)

PRMT10 Intellectual disability

PRNP Cerebral amyloid angiopathy, PRNP-related 137440 (3)

PROC Thrombophilia due to protein C deficiency, autosomal dominant, 176860 (3)/Thrombophilia due to protein C deficiency, autosomal recessive, 612304 (3)

PRODH Hyperprolinemia, type I, 239500 (3)/Schizophrenia, susceptibility to, 4, 600850 (3)

PROK2 Hypogonadotropic hypogonadism 4 with or without anosmia, 610628 (3)

PROKR2 Hypogonadotropic hypogonadism 3 with or without anosmia, 244200 (3)

PROM1 Cone-rod dystrophy 12, 612657 (3)/Macular dystrophy, retinal, 2, 608051 (3)/Retinitis pigmentosa 41, 612095 (3)/Stargardt disease 4, 603786 (3)

PROP1 Pituitary hormone deficiency, combined, 2, 262600 (3)

PROS1 Thrombophilia due to protein S deficiency, autosomal dominant, 612336 (3)/Thrombophilia due to protein S deficiency, autosomal recessive, 614514 (3)

PRPF3 Retinitis pigmentosa

PRPF31 Retinitis pigmentosa 11, 600138 (3)

PRPF6 Retinitis pigmentosa 60, 613983 (3)

PRPF8 Retinitis pigmentosa 13, 600059 (3)

PRPH2 Choroidal dystrophy, central areolar 2, 613105 (3)/Leber congenital amaurosis 18, 608133 (3)/Macular dystrophy, patterned, 1, 169150 (3)/Macular dystrophy, vitelliform, 3, 608161 (3)/Retinitis pigmentosa 7 and digenic, 608133 (3)/Retinitis punctata albescens, 136880 (3)

PRPS1 Arts syndrome, 301835 (3)/Charcot-Marie-Tooth disease, X-linked recessive, 5, 311070 (3)/Deafness, X-linked 1, 304500 (3)/Gout, PRPS-related, 300661 (3)/Phosphoribosylpyrophosphatesynthetase superactivity, 300661 (3)

PRRT2 Convulsions, familial infantile, with paroxysmal choreoathetosis, 602066 (3)/Episodic kinesigenic dyskinesia 1, 128200 (3)/Seizures, benign familial infantile, 2, 605751 (3)

PRRX1 Agnathia-otocephaly complex, 202650 (3)

PRSS1 Pancreatitis, hereditary, 167800 (3)/Trypsinogen deficiency, 614044 (1)

PRSS12 Mental retardation, autosomal recessive 1, 249500 (3)

PRSS56 Microphthalmia, isolated 6, 613517 (3)

PRX Charcot-Marie-Tooth disease, type 4F, 614895 (3)/Dejerine-Sottas disease, 145900 (3)

PSAP Combined SAP deficiency, 611721 (3)/Gaucher disease, atypical, 610539 (3)/Krabbe disease, atypical, 611722 (3)/Metachromatic leukodystrophy due to SAP-b deficiency, 249900 (3)

PSAT1 Phosphoserine aminotransferase deficiency, 610992 (3)/Neu-Laxova syndrome 2, 616038 (3)

PSEN1 Acne inversa, familial, 3, 613737 (3)/Alzheimer disease, type 3, 607822 (3)/Alzheimer disease, type 3, with spastic paraparesis and apraxia, 607822 (3)/Alzheimer disease, type 3, with spastic paraparesis and unusual plaques, 607822 (3)/Cardiomyopathy, dilated, 1U, 613694 (3)/Dementia, frontotemporal, 600274 (3)/Pick disease, 172700 (3)

PSEN2 Alzheimer disease-4, 606889 (3)/Cardiomyopathy, dilated, 1V, 613697 (3)

PSENEN Acne inversa, familial, 2, 613736 (3)

PSMB8 Autoinflammation, lipodystrophy, and dermatosis syndrome, 256040 (3)

PSMC3IP Ovarian dysgenesis 3, 614324 (3)

PSPH Phosphoserine phosphatase deficiency, 614023 (3)

PSTPIP1 Pyogenic sterile arthritis, pyoderma gangrenosum, and acne, 604416 (3)

PTCH1 Basal cell carcinoma, somatic, 605462 (3)/Basal cell nevus syndrome, 109400 (3)/Holoprosencephaly-7, 610828 (3)



PTCH2 Basal cell carcinoma, somatic, 605462 (3)/Basal cell nevus syndrome, 109400(3)/Medulloblastoma, 155255 (3)

PTCHD1 Intellectual disability, X-linked  
Bannayan-Riley-Ruvalcaba syndrome, 153480(3)/Cowden syndrome 1, 158350 (3)/Endometrial carcinoma, somatic, 608089 (3)/Lhermitte-Duclos syndrome, 158350 (3)/Macrocephaly/autism syndrome, 605309 (3)/Malignant melanoma, somatic, 155600(3)/PTEN hamartoma tumor syndrome (3)/Squamous cell carcinoma, head and neck, somatic, 275355 (3)/Thyroid carcinoma, follicular, somatic, 188470 (3)/VATER association with macrocephaly and ventriculomegaly, 276950 (3)/Glioma susceptibility 2, 613028 (3)/Meningioma, 607174 (3)/Prostate cancer, somatic, 176807 (3)

PTEN Malignant melanoma, somatic, 155600(3)/PTEN hamartoma tumor syndrome (3)/Squamous cell carcinoma, head and neck, somatic, 275355 (3)/Thyroid carcinoma, follicular, somatic, 188470 (3)/VATER association with macrocephaly and ventriculomegaly, 276950 (3)/Glioma susceptibility 2, 613028 (3)/Meningioma, 607174 (3)/Prostate cancer, somatic, 176807 (3)

PTF1A Pancreatic agenesis 2, 615935 (3)/Pancreatic and cerebellar agenesis, 609069 (3)

PTGIS Hypertension, essential, 145500 (3)

PTH Hypoparathyroidism, autosomal dominant, 146200(3)/Hypoparathyroidism, autosomal recessive, 146200(3)

PTH1R Osteochondrodysplasia, Blomstrand, type 1

PTHLH Brachydactyly, type E2, 613382(3)/Humoral hypercalcemia of malignancy (1)

PTPN11 LEOPARD syndrome 1, 151100 (3)/Leukemia, juvenile myelomonocytic, 607785 (3)/Metachondromatosis, 156250 (3)/Noonan syndrome 1, 163950 (3)

PTPN14 Choanal atresia and lymphedema, 613611 (3)

PTPRC Severe combined immunodeficiency, T cell-negative, B-cell/natural killer-cell positive, 608971 (3)/Hepatitis C virus, susceptibility to, 609532 (3)

PTPRJ Colon cancer, somatic, 114500 (3)

PTPRO Nephrotic syndrome, type 6, 614196(3)

PTPRQ Deafness, autosomal recessive 84A, 613391 (3)

PTRF Lipodystrophy, congenital generalized, type 4, 613327 (3)

PTS Hyperphenylalaninemia, BH4-deficient, A, 261640 (3)

PUS1 Mitochondrial myopathy and sideroblastic anemia 1, 600462 (3)

PVRL1 Cleft lip / palate

PVRL4 Ectodermal dysplasia-syndactyly syndrome 1, 613573 (3)

PYCR1 Cutis laxa, autosomal recessive, type IIB, 612940 (3)/Cutis laxa, autosomal recessive, type IIIB, 614438 (3)

PYGL Glycogen storage disease VI, 232700 (3)

PYGM McArdle disease, 232600 (3)

QDPR Hyperphenylalaninemia, BH4-deficient, C, 261630 (3)

RAB18 Warburg micro syndrome 3, 614222 (3)

RAB23 Carpenter syndrome, 201000 (3)

RAB27A Griscelli syndrome, type 2, 607624(3)

RAB39B Waisman syndrome, 311510 (3)/Mental retardation, X-linked 72, 300271 (3)

RAB3GAP1 Warburg micro syndrome 1, 600118(3)

RAB3GAP2 Martsolf syndrome, 212720 (3)/Warburg micro syndrome 2, 614225 (3)

RAB40AL Martin-Probst syndrome

RAB7A Charcot-Marie-Tooth disease 2b

RAC2 Neutrophil immunodeficiency syndrome, 608203 (3)

RAD21 Cornelia de Lange syndrome 4, 614701 (3)

RAD50 Nijmegen breakage syndrome-like disorder, 613078(3)

RAD51 Mirror movements, congenital

RAD51C Fanconi anemia, complementation group O, 613390 (3)/Breast-ovarian cancer, familial, susceptibility to, 3, 613399 (3)

RAD54L Adenocarcinoma, colonic, somatic (3)/Lymphoma, non-Hodgkin, somatic, 605027 (3)/Breast cancer, invasive ductal, 114480 (3)

RAF1 Cardiomyopathy, dilated, 1NN, 615916 (3)/LEOPARD syndrome 2, 611554 (3)/Noonan syndrome 5, 611553 (3)

RAG1 Alpha/beta T-cell lymphopenia with gamma/delta T-cell expansion, severe cytomegalovirus infection, and autoimmunity, 609889 (3)/Combined cellular and humoral immune defects with granulomas, 233650 (3)/Omenn syndrome, 603554 (3)/Severe combined immunodeficiency, B cell-negative, 601457 (3)

RAG2 Combined cellular and humoral immune defects with granulomas, 233650 (3)/Omenn syndrome, 603554 (3)/Severe combined immunodeficiency, B cell-negative, 601457 (3)

RAI1 Smith-Magenis syndrome, 182290 (3)  
 RALGDS Intellectual disability  
 RANBP2 Encephalopathy, acute, infection-induced, 3, susceptibility to, 608033 (3)  
 RANGRF Brugada syndrome  
 RAPSIN Fetal akinesia deformation sequence, 208150 (3)/Myasthenic syndrome, congenital, associated with acetylcholine receptor deficiency, 608931 (3)/Myasthenic syndrome, congenital, associated with facial dysmorphism and acetylcholine receptor deficiency, 608931 (3)  
 RARA Leukemia, acute promyelocytic, 612376 (1)  
 RARA-AS1 Leukemia, acute promyelocytic 612376 (1)  
 RARS2 Pontocerebellar hypoplasia, type 6, 611523 (3)  
 RASA1 Basal cell carcinoma, somatic, 605462 (3)/Capillary malformation-arteriovenous malformation, 608354 (3)/Parkes Weber syndrome, 608355 (3)  
 RASSF1 Lung cancer, 211980 (2)  
 RASSF1-AS1 Lung cancer 211980 (2)  
 RAX Microphthalmia, isolated 3, 611038 (3)  
 RAX2 Cone-rod dystrophy  
 RB1 Bladder cancer, somatic, 109800 (3)/Osteosarcoma, somatic, 259500 (3)/Retinoblastoma, 180200 (3)/Retinoblastoma, trilateral, 180200 (3)/Small cell cancer of the lung, somatic, 182280 (3)  
 RB1CC1 Breast cancer, somatic, 114480 (3)  
 RBBP8 Jawad syndrome, 251255 (3)/Pancreatic carcinoma, somatic (3)/Seckel syndrome 2, 606744 (3)  
 RBM10 TARP syndrome, 311900 (3)  
 RBM20 Cardiomyopathy, dilated, 1DD, 613172 (3)  
 RBM28 Alopecia, neurologic defects, and endocrinopathy syndrome, 612079 (3)  
 RBM8A Thrombocytopenia-absent radius syndrome, 274000 (3)  
 RBP3 Retinitis pigmentosa 66, 615233 (3)  
 RBP4 Retinol dystrophy, iris coloboma, and comedogenic acne syndrome, 615147 (3)  
 RBPJ Adams-Oliver syndrome 3, 614814 (3)  
 RD3 Leber congenital amaurosis 12 610612 (3)  
 RDH12 Leber congenital amaurosis 13 612712 (3)  
 RDH5 Fundus albipunctatus, 136880 (3)  
 RDX Deafness, autosomal recessive 24, 611022 (3)  
 RECQL4 Baller-Gerold syndrome, 218600 (3)/RAPADILINO syndrome, 266280 (3)/Rothmund-Thomson syndrome, 268400 (3)  
 REEP1 Neuronopathy, distal hereditary motor, type VB, 614751 (3)/Spastic paraplegia 31, autosomal dominant, 610250 (3)  
 RELN Lissencephaly 2 (Norman-Roberts type), 257320 (3)  
 REN Hyperuricemic nephropathy, familial juvenile 2, 613092 (3)/Renal tubular dysgenesis, 267430 (3)/[Hyperproreninemia] (3)  
 RET Central hypoventilation syndrome, congenital, 209880 (3)/Medullary thyroid carcinoma, 155240 (3)/Multiple endocrine neoplasia IIA, 171400 (3)/Multiple endocrine neoplasia IIB, 162300 (3)/Pheochromocytoma, 171300 (3)/Renal agenesis, 191830 (3)/Hirschsprung disease, susceptibility to, 1, 142623 (3)  
 RFT1 Congenital disorder of glycosylation, type In, 612015 (3)  
 RFX5 Bare lymphocyte syndrome, type II, complementation group C, 209920 (3)/Bare lymphocyte syndrome, type II, complementation group E, 209920 (3)  
 RFX6 Mitchell-Riley syndrome, 615710 (3)  
 RFXANK MHC class II deficiency, complementation group B, 209920 (3)  
 RFXAP Bare lymphocyte syndrome, type II, complementation group D, 209920 (3)  
 RGR Retinitis pigmentosa 44, 613769 (3)  
 RGS7 Intellectual disability  
 RGS9 Bradyopsia, 608415 (3)  
 RGS9BP Bradyopsia, 608415 (3)  
 RHAG Anemia, hemolytic, Rh-null, regulator type, 268150 (3)/Rh-mod syndrome (3)  
 RHBDF2 Tylosis with esophageal cancer, 148500 (3)

RHO Night blindness, congenital stationary, autosomal dominant 1, 610445 (3)/Retinitis pigmentosa 4, autosomal dominant or recessive, 613731 (3)/Retinitis punctata albescens, 136880 (3)

RIMS1 Cone-rod dystrophy 7, 603649 (3)

RIN2 Macrocephaly, alopecia, cutis laxa, and scoliosis, 613075 (3)

RIPK4 Popliteal pterygium syndrome 2, lethal type, 263650 (3)

RLBP1 Bothnia retinal dystrophy, 607475 (3)/Fundus albipunctatus, 136880 (3)/Newfoundland rod-cone dystrophy, 607476 (3)/Retinitis punctata albescens, 136880 (3)

RMND1 Combined oxidative phosphorylation deficiency 11, 614922 (3)

RNASEH2A Aicardi-Goutieres syndrome 4, 610333 (3)

RNASEH2B Aicardi-Goutieres syndrome 2, 610181 (3)

RNASEH2C Aicardi-Goutieres syndrome 3, 610329 (3)

RNASEL Prostate cancer 1, 601518 (3)

RNASET2 Leukoencephalopathy, cystic, without megalencephaly, 612951 (3)

RNF135 Macrocephaly, macrosomia, facial dysmorphism syndrome, 614192 (3)

RNF139 Renal cell carcinoma, 144700 (3)

RNF168 RIDDLE syndrome, 611943 (3)

RNF170 Ataxia, sensory, 1, autosomal dominant, 608984 (3)

RNF212 Recombination rate QTL 1, 612042 (3)

RNF213 Moyamoya disease 2, susceptibility to, 607151 (3)

RNF6 Esophageal carcinoma, somatic, 133239 (3)

ROBO2 Vesicoureteral reflux 2, 610878 (3)

ROBO3 Gaze palsy, horizontal, with progressive scoliosis, 607313 (3)

ROGDI Kohlschutter-Tonz syndrome, 226750 (3)

ROM1 Retinitis pigmentosa 7, digenic, 608133 (3)

ROR2 Brachydactyly, type B1, 113000 (3)/Robinow syndrome, autosomal recessive, 268310 (3)

RP1 Retinitis pigmentosa 1, 180100 (3)

RP1L1 Occult macular dystrophy, 613587 (3)

RP2 Retinitis pigmentosa 2, 312600 (3)

RP9 Retinitis pigmentosa 9, 180104 (3)

RPE65 Leber congenital amaurosis 2, 204100 (3)/Retinitis pigmentosa 20, 613794 (3)

RPGR Cone-rod dystrophy, X-linked, 1, 304020 (3)/Macular degeneration, X-linked atrophic, 300834 (3)/Retinitis pigmentosa 3, 300029 (3)/Retinitis pigmentosa, X-linked, and sinorespiratory infections, with or without deafness, 300455 (3)

RPGRIIP1 Cone-rod dystrophy 13, 608194 (3)/Leber congenital amaurosis 6, 613826 (3)

RPGRIIP1L COACH syndrome, 216360 (3)/Joubert syndrome 7, 611560 (3)/Meckel syndrome 5, 611561 (3)

RPIA Ribose 5-phosphate isomerase deficiency, 608611 (3)

RPL10 Autism, susceptibility to, X-linked 5, 300847 (3)

RPL11 Diamond-Blackfan anemia 7, 612562 (3)

RPL21 Hypotrichosis 12, 615885 (3)

RPL26 Diamond-Blackfan anemia 11, 614900 (3)

RPL35A Diamond-Blackfan anemia 5, 612528 (3)

RPL5 Diamond-Blackfan anemia 6, 612561 (3)

RPS10 Diamond-Blackfan anemia 9, 613308 (3)

RPS14 Macrocytic anemia, refractory, due to 5q deletion, somatic, 153550 (3)

RPS17 Diamond-Blackfan anemia 4, 612527 (3)

RPS19 Diamond-Blackfan anemia 1, 105650 (3)

RPS24 Diamond-blackfan anemia 3, 610629 (3)

RPS26 Diamond-Blackfan anemia 10, 613309 (3)

RPS6KA3 Coffin-Lowry syndrome, 303600 (3)/Mental retardation, X-linked 19, 300844 (3)

RPS7 Diamond-Blackfan anemia 8, 612563 (3)

RPSA Asplenia, isolated congenital, 271400 (3)

RRM2B Mitochondrial DNA depletion syndrome 8A (encephalomyopathic type with renal tubulopathy), 612075 (3)/Mitochondrial DNA depletion syndrome 8B (MNGIE type), 612075 (3)/Progressive external ophthalmoplegia with mitochondrial DNA deletions, autosomal dominant, 5, 613077 (3)

RS1 Retinoschisis, 312700 (3)  
 RSPH4A Ciliary dyskinesia, primary, 11, 612649 (3)  
 RSPH9 Ciliary dyskinesia, primary, 12, 612650 (3)  
 RSPO1 Palmoplantar hyperkeratosis and true hermaphroditism, 610644 (3)/Palmoplantar hyperkeratosis with squamous cell carcinoma of skin and sex reversal, 610644 (3)  
 RSPO4 Anonychia congenita, 206800 (3)  
 RTN2 Spastic paraplegia 12, autosomal dominant, 604805 (3)  
 RTTN Polymicrogyria with seizures, 614833 (3)  
 RUNX1 Leukemia, acute myeloid, 601626 (3)/Platelet disorder, familial, with associated myeloid malignancy, 601399 (3)  
 RUNX2 Cleidocranial dysplasia, 119600 (3)/Cleidocranial dysplasia, forme fruste, dental anomalies only, 119600 (3)/Cleidocranial dysplasia, forme fruste, with brachydactyly, 119600 (3)/Metaphyseal dysplasia with maxillary hypoplasia with or without brachydactyly, 156510 (3)  
 RXFP2 Cryptorchidism/Testicular Diseases/Disorder Of Male Reproductive System  
 RYR1 Central core disease, 117000 (3)/King-Denborough syndrome, 145600 (3)/Minicore myopathy with external ophthalmoplegia, 255320 (3)/Neuromuscular disease, congenital, with uniform type 1 fiber, 117000 (3)/Malignant hyperthermia susceptibility 1, 145600 (3)  
 RYR2 Arrhythmogenic right ventricular dysplasia 2, 600996 (3)/Ventricular tachycardia, catecholaminergic polymorphic, 1, 604772 (3)  
 SACS Spastic ataxia, Charlevoix-Saguenay type, 270550 (3)  
 SAG Oguchi disease-1, 258100 (3)/Retinitis pigmentosa 47, 613758 (3)  
 SALL1 Townes-Brocks branchiootorenal-like syndrome, 107480 (3)/Townes-Brocks syndrome, 107480 (3)  
 SALL4 Duane-radial ray syndrome, 607323 (3)/IVIC syndrome, 147750 (3)  
 SAMD9 Tumoral calcinosis, familial, normophosphatemic, 610455 (3)  
 SAMHD1 Aicardi-Goutieres syndrome 5, 612952 (3)/Chilblain lupus 2, 614415 (3)  
 SAR1B Chylomicron retention disease, 246700 (3)  
 SARS2 Hyperuricemia, pulmonary hypertension, renal failure, and alkalosis, 613845 (3)  
 SART3 Disseminated superficial actinic porokeratosis  
 SAT1 Keratosis follicularis spinulosa decalvans, 308800 (3)  
 SATB2 Glass syndrome, 612313 (3)  
 SBDS Shwachman-Bodian-Diamond syndrome, 260400 (3)  
 SBF2 Charcot-Marie-Tooth disease, type 4B2, 604563 (3)  
 SC5D Lathosterolosis 607330 (3)  
 SCARB2 Epilepsy, progressive myoclonic 4, with or without renal failure, 254900 (3)  
 SCARF2 Van den Ende-Gupta syndrome, 600920 (3)  
 SCN1A Dravet syndrome, 607208 (3)/Epilepsy, generalized, with febrile seizures plus, type 2, 604403 (3)/Febrile seizures, familial, 3A, 604403 (3)/Migraine, familial hemiplegic, 3, 609634 (3)  
 SCN1B Atrial fibrillation, familial, 13, 615377 (3)/Brugada syndrome 5, 612838 (3)/Cardiac conduction defect, nonspecific, 612838 (3)/Epilepsy, generalized, with febrile seizures plus, type 1, 604233 (3)  
 SCN2A Epileptic encephalopathy, early infantile, 11, 613721 (3)/Seizures, benign familial infantile, 3, 607745 (3)  
 SCN2B Atrial fibrillation, familial, 14, 615378 (3)  
 SCN3B Atrial fibrillation, familial, 16, 613120 (3)/Brugada syndrome 7, 613120 (3)  
 SCN4A Hyperkalemic periodic paralysis, type 2, 170500 (3)/Hypokalemic periodic paralysis, type 2, 613345 (3)/Myasthenic syndrome, acetazolamide-responsive, 614198 (3)/Myotonia congenita, atypical, acetazolamide-responsive, 608390 (3)/Paramyotonia congenita, 168300 (3)  
 SCN4B Atrial fibrillation, familial, 17, 611819 (3)/Long QT syndrome-10, 611819 (3)  
 SCN5A Atrial fibrillation, familial, 10, 614022 (3)/Brugada syndrome 1, 601144 (3)/Cardiomyopathy, dilated, 1E, 601154 (3)/Heart block, nonprogressive, 113900 (3)/Heart block, progressive, type IA, 113900 (3)/Long QT syndrome-3, 603830 (3)/Sick sinus syndrome 1, 608567 (3)/Ventricular fibrillation, familial, 1, 603829 (3)/Sudden infant death syndrome, susceptibility to, 272120 (3)  
 SCN8A Cognitive impairment with or without cerebellar ataxia, 614306 (3)/Epileptic encephalopathy, early infantile, 13, 614558 (3)

SCN9A Epilepsy, generalized, with febrile seizures plus, type 7, 613863 (3)/Erythralgia, primary, 133020 (3)/Febrile seizures, familial, 3B, 613863 (3)/HSAN2D, autosomal recessive, 243000 (3)/Insensitivity to pain, congenital, 243000 (3)/Paroxysmal extreme pain disorder, 167400, (3)/Small fiber neuropathy, 133020 (3)/Dravet syndrome, modifier of, 607208 (3)

SCNN1A Bronchiectasis with or without elevated sweat chloride 2, 613021 (3)/Pseudohypoaldosteronism, type I, 264350 (3)

SCNN1B Bronchiectasis with or without elevated sweat chloride 1, 211400 (3)/Liddle syndrome, 177200 (3)/Pseudohypoaldosteronism, type I, 264350 (3)

SCNN1G Bronchiectasis with or without elevated sweat chloride 3, 613071 (3)/Liddle syndrome, 177200 (3)/Pseudohypoaldosteronism, type I, 264350 (3)

SCO1 Cytochrome c oxidase deficiency

SCO2 Cardioencephalomyopathy, fatal infantile, due to cytochrome c oxidase deficiency 1, 604377 (3)/Myopia 6, 608908 (3)

SCP2 Leukoencephalopathy with dystonia and motor neuropathy, 613724 (3)

SDCCAG8 Bardet-Biedl syndrome 16, 615993 (3)/Senior-Loken syndrome 7, 613615 (3)

SDHA Cardiomyopathy, dilated, 1GG, 613642 (3)/Leigh syndrome, 256000 (3)/Mitochondrial respiratory chain complex II deficiency, 252011 (3)/Paragangliomas 5, 614165 (3)

SDHAF1 Mitochondrial complex II deficiency, 252011 (3)

SDHAF2 Paragangliomas 2, 601650 (3)

SDHB Cowden syndrome 2, 612359 (3)/Gastrointestinal stromal tumor, 606764 (3)/Paraganglioma and gastric stromal sarcoma, 606864 (3)/Paragangliomas 4, 115310 (3)/Pheochromocytoma, 171300 (3)

SDHC Gastrointestinal stromal tumor, 606764 (3)/Paraganglioma and gastric stromal sarcoma, 606864 (3)/Paragangliomas 3, 605373 (3)

SDHD Carcinoid tumors, intestinal, 114900 (3)/Cowden syndrome 3, 615106 (3)/Merkel cell carcinoma, somatic (3)/Paraganglioma and gastric stromal sarcoma, 606864 (3)/Paragangliomas 1, with or without deafness, 168000 (3)/Pheochromocytoma, 171300 (3)

SEC23A Craniolenticulosutural dysplasia, 607812 (3)

SEC23B Dyserythropoietic anemia, congenital, type II, 224100 (3)

SEC63 Polycystic liver disease, 174050 (3)

SECISBP2 Thyroid hormone metabolism, abnormal, 609698 (3)

SEMA3A Hypogonadotropic hypogonadism 16 with or without anosmia, 614897 (3)

SEMA3E CHARGE syndrome, 214800 (3)

SEMA4A Cone-rod dystrophy 10, 610283 (3)/Retinitis pigmentosa 35, 610282 (3)

SEPN1 Muscular dystrophy, rigid spine, 1, 602771 (3)/Myopathy, congenital, with fiber-type disproportion, 255310 (3)

SEPSECS Pontocerebellar hypoplasia type 2D, 613811 (3)

SEPT12 Spermatogenic failure 10 614822 (3)

SEPT9 Amyotrophy, hereditary neuralgic 162100 (3)

SERAC1 3-methylglutaconic aciduria with deafness, encephalopathy, and Leigh-like syndrome, 614739 (3)

SERPINA1 Emphysema due to AAT deficiency, 613490 (3)/Emphysema-cirrhosis, due to AAT deficiency, 613490 (3)/Hemorrhagic diathesis due to 'antithrombin' Pittsburgh, 613490 (3)/Pulmonary disease, chronic obstructive, susceptibility to, 606963 (1)

SERPINA6 Corticosteroid-binding globulin deficiency

SERPINA7 Thyroxine-binding globulin deficiency

SERPINB6 Deafness, autosomal recessive 91, 613453 (3)

SERPINC1 Thrombophilia due to antithrombin III deficiency, 613118 (3)

SERPIND1 Heparin cofactor 2 deficiency

SERPINE1 Plasminogen activator inhibitor 1 deficiency

SERPINF1 Osteogenesis imperfecta, type VI, 613982 (3)

SERPINF2 Antiplasmin alpha 2 deficiency

SERPING1 Angioneurotic oedema

SERPINH1 Osteogenesis imperfecta, type X, 613848 (3)/Preterm premature rupture of the membranes, susceptibility to, 610504 (3)

SERPINI1 Encephalopathy, familial, with neuroserpin inclusion bodies, 604218 (3)

SETBP1 Mental retardation, autosomal dominant 29, 616078 (3)/Schinzel-Giedion midface retraction syndrome, 269150 (3)  
 SETD5 Mental retardation, autosomal dominant 23, 615761 (3)  
 SETX Amyotrophic lateral sclerosis 4, juvenile, 602433 (3)/Ataxia-ocular apraxia-2, 606002 (3)  
 SF3B1 Myelodysplastic syndrome, somatic, 614286 (3)  
 SF3B4 Acrofacial dysostosis 1, Nager type, 154400 (3)  
 SFTPA1 {Pulmonary fibrosis, idiopathic, susceptibility to} 178500 (3)  
 SFTPA2 Pulmonary fibrosis, idiopathic 178500 (3)  
 SFTPB Surfactant metabolism dysfunction, pulmonary, 1, 265120 (3)  
 SFTPC Surfactant metabolism dysfunction, pulmonary, 2, 610913 (3)  
 SGCA Muscular dystrophy, limb-girdle, type 2D, 608099 (3)  
 SGCB Muscular dystrophy, limb-girdle, type 2E, 604286 (3)  
 SGCD Cardiomyopathy, dilated, 1L, 606685 (3)/Muscular dystrophy, limb-girdle, type 2F, 601287 (3)  
 SGCE Dystonia-11, myoclonic, 159900 (3)  
 SGCG Muscular dystrophy, limb-girdle, type 2C, 253700 (3)  
 SGSH Mucopolysaccharidosis type IIIA (Sanfilippo A), 252900 (3)  
 SH2B3 Erythrocytosis, somatic, 133100 (3)/Myelofibrosis, somatic, 254450 (3)/Thrombocythemia, somatic, 187950 (3)  
 SH2D1A Lymphoproliferative syndrome, X-linked, 1, 308240 (3)  
 SH3BP2 Cherubism, 118400 (3)  
 SH3GL1 Leukemia, acute myeloid, 601626 (1)  
 SH3PXD2B Frank-ter Haar syndrome, 249420 (3)  
 SH3TC2 Charcot-Marie-Tooth disease, type 4C, 601596 (3)/Mononeuropathy of the median nerve, mild, 613353 (3)  
 SHANK2 Autism susceptibility 17, 613436 (3)  
 SHANK3 Phelan-McDermid syndrome, 606232 (3)/Schizophrenia 15, 613950 (3)  
 SHFM1 Split hand/foot malformation 1 (4)  
 SHH Holoprosencephaly-3, 142945 (3)/Microphthalmia with coloboma 5, 611638 (3)/Schizencephaly, 269160 (3)/Single median maxillary central incisor, 147250 (3)  
 SHOC2 Noonan-like syndrome with loose anagen hair, 607721 (3)  
 SHOX Langer mesomelic dysplasia, 249700  
 SHROOM4 Stocco dos Santos X-linked mental retardation syndrome, 300434 (3)  
 SI Sucrase-isomaltase deficiency, congenital, 222900 (3)  
 SIGMAR1 Amyotrophic lateral sclerosis 16, juvenile, 614373 (3)  
 SIL1 Marinesco-Sjogren syndrome, 248800 (3)  
 SIM1 Obesity, severe, 601665 (3)  
 SIX1 Brachiootic syndrome 3, 608389 (3)/Deafness, autosomal dominant 23, 605192 (3)  
 SIX3 Holoprosencephaly-2, 157170 (3)/Schizencephaly, 269160 (3)  
 SIX5 Branchiootorenal syndrome 2, 610896 (3)  
 SIX6 Microphthalmia with cataract 2, 212550 (3)  
 SKI Shprintzen-Goldberg syndrome, 182212 (3)  
 SKIV2L Trichohepatoenteric syndrome 2, 614602 (3)  
 SLC10A2 Bile acid malabsorption, primary, 613291 (3)  
 SLC11A2 Microcytic anaemia & iron overload  
 SLC12A1 Bartter syndrome, type 1, 601678 (3)  
 SLC12A3 Gitelman syndrome, 263800 (3)  
 SLC12A6 Agenesis of the corpus callosum with peripheral neuropathy, 218000 (3)  
 SLC16A1 Erythrocyte lactate transporter defect, 245340 (3)/Hyperinsulinemic hypoglycemia, familial, 7, 610021 (3)/Monocarboxylate transporter 1 deficiency, 616095 (3)  
 SLC16A12 Cataract, juvenile, with microcornea and glucosuria, 612018 (3)  
 SLC16A2 Allan-Herndon-Dudley syndrome, 300523 (3)  
 SLC17A5 Salla disease, 604369 (3)/Sialic acid storage disorder, infantile, 269920 (3)  
 SLC17A8 Deafness, autosomal dominant 25, 605583 (3)  
 SLC19A2 Thiamine-responsive megaloblastic anemia syndrome, 249270 (3)

SLC19A3 Thiamine metabolism dysfunction syndrome 2 (biotin- or thiamine-responsive encephalopathy type 2), 607483 (3)

SLC1A1 Dicarboxylic aminoaciduria, 222730 (3)/

SLC1A3 Episodic ataxia, type 6, 612656 (3)

SLC20A2 Basal ganglia calcification, idiopathic, 1, 213600 (3)

SLC22A12 Hypouricemia, renal, 220150 (3)

SLC22A18 Breast cancer, somatic 114480 (3)/Lung cancer, somatic 211980 (3)/Rhabdomyosarcoma, somatic 268210 (3)

SLC22A5 Carnitine deficiency, systemic primary, 212140 (3)

SLC24A1 Night blindness, congenital stationary (complete), 1D, autosomal recessive, 613830 (3)

SLC25A12 Hypomyelination, global cerebral, 612949 (3)

SLC25A13 Citrullinemia, adult-onset type II, 603471 (3)/Citrullinemia, type II, neonatal-onset, 605814 (3)

SLC25A15 Hyperornithinemia-hyperammonemia-homocitrullinemia syndrome, 238970 (3)

SLC25A19 Microcephaly, Amish type, 607196 (3)/Thiamine metabolism dysfunction syndrome 4 (progressive polyneuropathy type), 613710 (3)

SLC25A20 Carnitine-acylcarnitine translocase deficiency, 212138 (3)

SLC25A22 Epileptic encephalopathy, early infantile, 3, 609304 (3)

SLC25A3 Mitochondrial phosphate carrier deficiency, 610773 (3)

SLC25A38 Anemia, sideroblastic, pyridoxine-refractory, autosomal recessive, 205950 (3)

SLC25A4 Mitochondrial DNA depletion syndrome 12 (cardiomyopathic type), 615418 (3)/Progressive external ophthalmoplegia with mitochondrial DNA deletions 3, 609283 (3)

SLC26A1 ?Nephrolithiasis, calcium oxalate 167030 (3)

SLC26A2 Achondrogenesis Ib, 600972 (3)/Atelosteogenesis II, 256050 (3)/De la Chapelle dysplasia, 256050 (3)/Diastrophic dysplasia, 222600 (3)/Diastrophic dysplasia, broad bone-platyspondylic variant, 222600 (3)/Epiphyseal dysplasia, multiple, 4, 226900 (3)

SLC26A3 Diarrhea 1, secretory chloride, congenital, 214700 (3)

SLC26A4 Deafness, autosomal recessive 4, with enlarged vestibular aqueduct, 600791 (3)/Pendred syndrome, 274600 (3)

SLC26A5 Deafness, autosomal recessive 61, 613865 (3)

SLC27A4 Ichthyosis prematurity syndrome, 608649 (3)

SLC29A3 Histiocytosis-lymphadenopathy plus syndrome, 602782 (3)

SLC2A1 Dystonia 9, 601042 (3)/GLUT1 deficiency syndrome 1, 606777 (3)/GLUT1 deficiency syndrome 2, 612126 (3)/Epilepsy, idiopathic generalized, susceptibility to, 12, 614847 (3)

SLC2A10 Arterial tortuosity syndrome, 208050 (3)

SLC2A2 Fanconi-Bickel syndrome, 227810 (3)/Diabetes mellitus, noninsulin-dependent, 135853 (3)

SLC2A9 Hypouricemia, renal, 2, 612076 (3)/Uric acid concentration, serum, QTL 2, 612076 (3)

SLC30A10 Hypermanganesemia with dystonia, polycythemia, and cirrhosis, 613280 (3)

SLC30A2 Zinc deficiency, transient neonatal, 608118 (3)

SLC31A1 Intellectual disability

SLC33A1 Congenital cataracts, hearing loss, and neurodegeneration, 614482 (3)/Spastic paraplegia 42, autosomal dominant, 612539 (3)

SLC34A1 Fanconi renal tubular syndrome 2, 613388 (3)/Nephrolithiasis/osteoporosis, hypophosphatemic, 1, 612286 (3)

SLC34A2 Testicular microlithiasis, 610441 (3)/Pulmonary alveolar microlithiasis, 265100 (3)

SLC34A3 Hypophosphatemic rickets with hypercalciuria, 241530 (3)

SLC35A1 Congenital disorder of glycosylation, type IIf, 603585 (3)

SLC35C1 Congenital disorder of glycosylation, type IIc, 266265 (3)

SLC35D1 Schneckenbecken dysplasia, 269250 (3)

SLC36A2 Hyperglycinuria, 138500 (3)/Iminoglycinuria, digenic, 242600 (3)

SLC37A4 Glycogen storage disease Ib, 232220 (3)/Glycogen storage disease Ic, 232240 (3)

SLC39A13 Spondylocheirodysplasia, Ehlers-Danlos syndrome-like, 612350 (3)

SLC39A4 Acrodermatitis enteropathica, 201100 (3)

SLC3A1 Cystinuria, 220100 (3)

SLC40A1 Hemochromatosis, type 4, 606069 (3)

Albinism, oculocutaneous, type IV, 606574 (3)/[Skin/hair/eye pigmentation 5, black/nonblack hair], 227240 (3)/[Skin/hair/eye pigmentation 5, dark/fair skin], 227240 (3)/[Skin/hair/eye pigmentation 5, dark/light eyes], 227240 (3)

SLC45A2

Folate malabsorption, hereditary, 229050 (3)

SLC46A1

Ovalocytosis (3)/Renal tubular acidosis, distal, AD, 179800 (3)/Renal tubular acidosis, distal, AR, 611590 (3)/Spherocytosis, type 4, 612653 (3)/[Blood group, Diego], 110500 (3)/[Blood group, Froese], 601551 (3)/[Blood group, Swann], 601550 (3)/[Blood group, Waldner], 112010 (3)/[Blood group, Wright], 112050 (3)/[Malaria, resistance to], 611162 (3)

SLC4A1

Corneal dystrophy, Fuchs endothelial, 4, 613268 (3)/Corneal endothelial dystrophy 2, autosomal recessive, 217700 (3)/Corneal endothelial dystrophy and perceptive deafness, 217400 (3)

SLC4A11

Renal tubular acidosis, proximal, with ocular abnormalities, 604278 (3)

SLC4A4

Brown-Vialetto-Van Laere syndrome 2, 614707 (3)

SLC52A2

Brown-Vialetto-Van Laere syndrome 1, 211530 (3)/Fazio-Londe disease, 211500 (3)

SLC52A3

Glucose/galactose malabsorption, 606824 (3)

SLC5A1

Renal glucosuria, 233100 (3)

SLC5A2

Thyroid dysmorphogenesis 1, 274400 (3)

SLC5A5

Neuronopathy, distal hereditary motor, type VIIA, 158580 (3)

SLC5A7

Myoclonic-atonic epilepsy 616421 (3)

SLC6A1

Hartnup disorder, 234500 (3)/Hyperglycinuria, 138500 (3)/Iminoglycinuria, digenic, 242600 (3)

SLC6A19

Orthostatic intolerance, 604715 (3)

SLC6A2

Hyperglycinuria, 138500 (3)/Iminoglycinuria, digenic, 242600 (3)

SLC6A20

Parkinsonism-dystonia, infantile, 613135 (3)/Nicotine dependence, protection against, 188890 (3)

SLC6A3

Hyperekplexia 3, 614618 (3)

SLC6A5

Cerebral creatine deficiency syndrome 1, 300352 (3)

SLC6A8

Lysinuric protein intolerance, 222700 (3)

SLC7A7

Cystinuria, 220100 (3)

SLC7A9

Nephrolithiasis/osteoporosis, hypophosphatemic, 2, 612287 (3)

SLC9A3R1

Mental retardation, X-linked syndromic, Christianson type, 300243 (3)

SLC9A6

Hyperbilirubinemia, Rotor type, digenic, 237450 (3)

SLCO1B1

Hyperbilirubinemia, Rotor type, digenic, 237450 (3)

SLCO1B3

Hypertrophic osteoarthropathy, primary, autosomal recessive 2, 614441 (3)

SLCO2A1

Tourette syndrome, 137580 (3)/Trichotillomania, 613229 (3)

SLITRK1

Meleda disease, 248300 (3)

SLURP1

Fanconi anemia, complementation group P, 613951 (3)

SLX4

Loey-Dietz syndrome, type 3, 613795 (3)

SMAD3

Pulmonary arterial hypertension

SMAD4

Aortic valve disease 2, 614823 (3)

SMAD6

Pulmonary arterial hypertension

SMAD9

Nicolaides-Baraitser syndrome, 601358 (3)

SMARCA2

Mental retardation, autosomal dominant 16, 614609 (3)/Rhabdoid tumor predisposition syndrome 2, 613325 (3)

SMARCA4

Adermatoglyphia, 136000 (3)

SMARCAD1

Schimke immunosseous dysplasia, 242900 (3)

SMARCAL1

Mental retardation, autosomal dominant 15, 614608 (3)/Rhabdoid tumors, somatic, 609322 (3)/Rhabdoid predisposition syndrome 1, 609322 (3)/Schwannomatosis-1, susceptibility to, 162091 (3)

SMARCB1

Coffin-Siris syndrome 5 616938 (3)

SMARCE1

Cornelia de Lange syndrome

SMC1A

Cornelia de Lange syndrome

SMC3

Spinal muscular atrophy-1, 253300 (3)/Spinal muscular atrophy-2, 253550 (3)/Spinal muscular atrophy-3, 253400 (3)/Spinal muscular atrophy-4, 271150 (3)

SMN1

{Spinal muscular atrophy, type III, modifier of} 253400

SMN2

Microphthalmia with limb anomalies, 206920 (3)

SMOC1

Dentin dysplasia, type I, with microdontia and misshapen teeth, 125400 (3)

SMOC2

Niemann-Pick disease, type A 257200 (3)/Niemann-Pick disease, type B 607616 (3)

SMPD1



SMPX Deafness, X-linked 4, 300066 (3)  
 SNAI2 Piebaldism, 172800 (3)/Waardenburg syndrome, type 2D, 608890 (3)  
 SNAP29 Cerebral dysgenesis, neuropathy, ichthyosis, and palmoplantar keratoderma syndrome, 609528 (3)  
 SNCA Dementia, Lewy body, 127750 (3)/Parkinson disease 1, 168601 (3)/Parkinson disease 4, 605543 (3)  
 SNCB Dementia, Lewy body, 127750 (3)  
 SNIP1 Psychomotor retardation, epilepsy, and craniofacial dysmorphism, 614501 (3)  
 SNRNP200 Retinitis pigmentosa 33, 610359 (3)  
 SNRPN Prader-Willi syndrome, 176270 (3)  
 SNTA1 Sudden infant death syndrome  
 SOBP Mental retardation, anterior maxillary protrusion, and strabismus, 613671 (3)  
 SOD1 Amyotrophic lateral sclerosis 1, 105400 (3)  
 SOS1 Fibromatosis, gingival, 135300 (3)/Noonan syndrome 4, 610733 (3)  
 SOST Craniodiaphyseal dysplasia, autosomal dominant, 122860 (3)/Sclerosteosis 1, 269500 (3)/Van Buchem disease, 239100 (3)  
 SOX10 PCWH syndrome, 609136 (3)/Waardenburg syndrome, type 2E, with or without neurologic involvement, 611584 (3)/Waardenburg syndrome, type 4C, 613266 (3)  
 SOX17 Vesicoureteral reflux 3, 613674 (3)  
 SOX18 Hypotrichosis-lymphedema-telangiectasia syndrome, 607823 (3)  
 SOX2 Microphthalmia, syndromic 3, 206900 (3)/Optic nerve hypoplasia and abnormalities of the central nervous system, 206900 (3)  
 SOX3 Langer mesomelic dysplasia  
 SOX9 Acampomelic campomelic dysplasia, 114290 (3)/Campomelic dysplasia with autosomal sex reversal, 114290 (3)/Campomelic dysplasia, 114290 (3)  
 SP110 Hepatic venoocclusive disease with immunodeficiency, 235550 (3)/Mycobacterium tuberculosis, susceptibility to, 607948 (3)  
 SP7 Osteogenesis imperfecta, type XII, 613849 (3)  
 SPAST Spastic paraplegia 4, autosomal dominant, 182601 (3)  
 SPATA16 Spermatogenic failure 6, 102530 (3)  
 SPATA7 Leber congenital amaurosis 3, 604232 (3)/Retinitis pigmentosa, juvenile, autosomal recessive, 604232 (3)  
 SPECC1L Facial clefting, oblique, 1, 600251 (3)  
 SPG11 Spastic paraplegia 11, autosomal recessive, 604360 (3)  
 SPG20 Troyer syndrome, 275900 (3)  
 SPG21 Mast syndrome 248900 (3)  
 SPG7 Spastic paraplegia 7, autosomal recessive 607259 (3)  
 SPINK1 Pancreatitis, hereditary, 167800 (3)/Tropical calcific pancreatitis, 608189 (3)/Fibrocalculous pancreatic diabetes, susceptibility to, 608189 (3)  
 SPINK5 Atopy, 147050 (3)/Netherton syndrome, 256500 (3)  
 SPINT2 Diarrhea 3, secretory sodium, congenital, syndromic, 270420 (3)  
 SPR Dystonia, dopa-responsive, due to sepiapterin reductase deficiency, 612716 (3)  
 SPRED1 Legius syndrome, 611431 (3)  
 SPTA1 Elliptocytosis-2, 130600 (3)/Pyropoikilocytosis, 266140 (3)/Spherocytosis, type 3, 270970 (3)  
 SPTAN1 Epileptic encephalopathy, early infantile, 5, 613477 (3)  
 SPTB Anemia, neonatal hemolytic, fatal and near-fatal (3)/Elliptocytosis-3 (3)/Spherocytosis, type 2 (3)  
 SPTBN2 Spinocerebellar ataxia 5, 600224 (3)/Spinocerebellar ataxia, autosomal recessive 14, 615386 (3)  
 SPTLC1 Neuropathy, hereditary sensory and autonomic, type IA, 162400 (3)  
 SPTLC2 Neuropathy, hereditary sensory and autonomic, type IC, 613640 (3)  
 SQSTM1 Paget disease of bone, 602080 (3)  
 SRCAP Floating-Harbor syndrome, 136140 (3)  
 SRD5A2 Pseudovaginal perineoscrotal hypospadias, 264600 (3)  
 SRD5A3 Congenital disorder of glycosylation, type Iq, 612379 (3)/Kahrizi syndrome, 612713 (3)  
 SRP72 Bone marrow failure syndrome 1, 614675 (3)  
 SRPX2 Rolandic epilepsy, mental retardation, and speech dyspraxia, 300643 (3)  
 SRY 46XX sex reversal 1, 400045 (3)/46XY sex reversal 1, 400044 (3)  
 SSTR5 Somatostatin analog, resistance to, 102200 (3)

ST14 Ichthyosis, congenital, autosomal recessive 11, 602400 (3)

ST3GAL3 Epileptic encephalopathy, early infantile, 15, 615006 (3)/Mental retardation, autosomal recessive 12, 611090 (3)

ST3GAL5 Amish infantile epilepsy syndrome

STAR Lipoid adrenal hyperplasia, 201710 (3)

STAT1 Immunodeficiency 31A, mycobacteriosis, autosomal dominant, 614892 (3)/Immunodeficiency 31B, mycobacterial and viral infections, autosomal recessive, 613796 (3)/Immunodeficiency 31C, autosomal dominant, 614162 (3)

STAT3 Autoimmune disease, multisystem, infantile-onset, 615952 (3)/Hyper-IgE recurrent infection syndrome, 147060 (3)

STAT5B Growth hormone insensitivity with immunodeficiency, 245590 (3)/Leukemia, acute promyelocytic, STAT5B/RARA type (3)

STIL Microcephaly 7, primary, autosomal recessive, 612703 (3)

STIM1 Immunodeficiency 10, 612783 (3)/Myopathy, tubular aggregate, 1 160565 (3)/Stormorken syndrome, 185070 (3)

STK11 Melanoma, malignant, somatic (3)/Pancreatic cancer, 260350 (3)/Peutz-Jeghers syndrome, 175200 (3)/Testicular tumor, somatic, 273300 (3)

STK4 T-cell immunodeficiency, recurrent infections, autoimmunity, and cardiac malformations, 614868 (3)

STOX1 Preeclampsia/eclampsia 4, 609404 (3)

STRA6 Microphthalmia, isolated, with coloboma 8, 601186 (3)/Microphthalmia, syndromic 9, 601186 (3)

STRADA Polyhydramnios, megalencephaly, and symptomatic epilepsy, 611087 (3)

STRC Deafness, autosomal recessive 16, 603720 (3)

STS Ichthyosis, X-linked, 308100 (3)

STX11 Hemophagocytic lymphohistiocytosis, familial, 4, 603552 (3)

STX16 Pseudohypoparathyroidism, type 1B, 603233 (3)

STXBP1 Epileptic encephalopathy, early infantile, 4, 612164 (3)

STXBP2 Hemophagocytic lymphohistiocytosis, familial, 5, 613101 (3)

SUCLA2 Mitochondrial DNA depletion syndrome 5 (encephalomyopathic with or without methylmalonic aciduria), 612073 (3)

SUCLG1 Mitochondrial DNA depletion syndrome 9 (encephalomyopathic type with methylmalonic aciduria), 245400 (3)

SUFU Basal cell nevus syndrome, 109400 (3)/Medulloblastoma, desmoplastic, 155255 (3)/Meningioma, familial, susceptibility to, 607174 (3)

SUMF1 Multiple sulfatase deficiency, 272200 (3)

SUMO1 Orofacial cleft 10, 613705 (3)

SUOX Sulfite oxidase deficiency, 272300 (3)

SURF1 Leigh syndrome, due to COX deficiency, 256000 (3)

SYCP3 Spermatogenic failure 4, 270960 (3)/Pregnancy loss, susceptibility to (3)

SYN1 Epilepsy, X-linked, with variable learning disabilities and behavior disorders, 300491 (3)

SYNE1 Emery-Dreifuss muscular dystrophy 4, autosomal dominant, 612998 (3)/Spinocerebellar ataxia, autosomal recessive 8, 610743 (3)

SYNE2 Emery-Dreifuss muscular dystrophy 5, autosomal dominant, 612999 (3)

SYNGAP1 Mental retardation, autosomal dominant 5, 612621 (3)

SYP Mental retardation, X-linked 96, 300802 (3)

SYT14 Spinocerebellar ataxia, autosomal recessive 11, 614229 (3)

TAB2 Congenital heart defects, nonsyndromic, 2, 614980 (3)

TAC3 Hypogonadotropic hypogonadism 10 with or without anosmia, 614839 (3)

TACR3 Hypogonadotropic hypogonadism 11 with or without anosmia, 614840 (3)

TACSTD2 Corneal dystrophy, gelatinous drop-like, 204870 (3)

TAF1 Dystonia-Parkinsonism, X-linked, 314250 (3)

TAF15 Chondrosarcoma, extraskeletal myxoid, 612237 (1)

TAF2 Mental retardation, autosomal recessive 40, 615599 (3)

TAF6 Alazami-Yuan syndrome 617126 (3)

TAL1 Leukemia-1, T-cell acute lymphocytic (3)

|            |                                                                                                                                                                                                                                                                                                                                          |
|------------|------------------------------------------------------------------------------------------------------------------------------------------------------------------------------------------------------------------------------------------------------------------------------------------------------------------------------------------|
| TALDO1     | Transaldolase deficiency, 606003 (3)                                                                                                                                                                                                                                                                                                     |
| TAP1       | Bare lymphocyte syndrome, type I, 604571 (3)                                                                                                                                                                                                                                                                                             |
| TAP2       | Bare lymphocyte syndrome, type I, due to TAP2 deficiency, 604571 (3)/Wegener-like granulomatosis (3)                                                                                                                                                                                                                                     |
| TAPBP      | Bare lymphocyte syndrome, type I, 604571 (3)                                                                                                                                                                                                                                                                                             |
| TARDBP     | Amotrophic lateral sclerosis 10, with or without FTD, 612069 (3)/Frontotemporal lobar degeneration, TARDBP-related, 612069 (3)                                                                                                                                                                                                           |
| TAT        | Tyrosinemia, type II, 276600 (3)                                                                                                                                                                                                                                                                                                         |
| TAZ        | Barth syndrome, 302060 (3)                                                                                                                                                                                                                                                                                                               |
| TBC1D24    | DOOR syndrome, 220500 (3)/Deafness, autosomal recessive 86, 614617 (3)/Deafness, autosomal dominant 65, 616044 (3)/Epileptic encephalopathy, early infantile, 16, 615338 (3)/Myoclonic epilepsy, infantile, familial, 605021 (3)                                                                                                         |
| TBCE       | Hypoparathyroidism-retardation-dysmorphism syndrome, 241410 (3)/Kenny-Caffey syndrome-1, 244460 (3)                                                                                                                                                                                                                                      |
| TBP        | Spinocerebellar ataxia 17, 607136 (3)/Parkinson disease, susceptibility to, 168600 (3)                                                                                                                                                                                                                                                   |
| TBX1       | DiGeorge syndrome 188400 (3)/Tetralogy of Fallot 187500 (3)/Velocardiofacial syndrome 192430 (3)                                                                                                                                                                                                                                         |
| TBX15      | Cousin syndrome, 260660 (3)                                                                                                                                                                                                                                                                                                              |
| TBX19      | Adrenocorticotropic hormone deficiency, 201400 (3)                                                                                                                                                                                                                                                                                       |
| TBX20      | Atrial septal defect 4, 611363 (3)                                                                                                                                                                                                                                                                                                       |
| TBX21      | Asthma and nasal polyps, 208550 (3)/Asthma, aspirin-induced, susceptibility to, 208550 (3)                                                                                                                                                                                                                                               |
| TBX22      | Abruzzo-Erickson syndrome, 302905 (3)/Cleft palate with ankyloglossia, 303400 (3)                                                                                                                                                                                                                                                        |
| TBX3       | Ulnar-mammary syndrome, 181450 (3)                                                                                                                                                                                                                                                                                                       |
| TBX4       | Small patella syndrome, 147891 (3)                                                                                                                                                                                                                                                                                                       |
| TBX5       | Holt-Oram syndrome, 142900 (3)                                                                                                                                                                                                                                                                                                           |
| TBXAS1     | Thromboxane synthase deficiency, 614158 (1)/Ghosal hematodiaphyseal syndrome, 231095 (3)                                                                                                                                                                                                                                                 |
| TCAP       | Cardiomyopathy, dilated, 1N, 607487 (3)/Muscular dystrophy, limb-girdle, type 2G, 601954 (3)                                                                                                                                                                                                                                             |
| TCF4       | Pitt-Hopkins syndrome, 610954 (3)                                                                                                                                                                                                                                                                                                        |
| TCIRG1     | Osteopetrosis, autosomal recessive 1, 259700 (3)                                                                                                                                                                                                                                                                                         |
| TCL1A      | Leukemia/lymphoma, T-cell (2)                                                                                                                                                                                                                                                                                                            |
| TCN2       | Transcobalamin II deficiency, 275350 (3)                                                                                                                                                                                                                                                                                                 |
| TCOF1      | Treacher Collins syndrome 1, 154500 (3)                                                                                                                                                                                                                                                                                                  |
| TCTN1      | Joubert syndrome                                                                                                                                                                                                                                                                                                                         |
| TCTN2      | Meckel syndrome 8, 613885 (3)                                                                                                                                                                                                                                                                                                            |
| TCTN3      | Joubert syndrome 18, 614815 (3)/Orofaciodigital syndrome IV, 258860 (3)                                                                                                                                                                                                                                                                  |
| TDGF1      | Forebrain defects (3)                                                                                                                                                                                                                                                                                                                    |
| TDP1       | Spinocerebellar ataxia, autosomal recessive with axonal neuropathy, 607250 (3)                                                                                                                                                                                                                                                           |
| TDRD7      | Cataract 36, 613887 (3)                                                                                                                                                                                                                                                                                                                  |
| TEAD1      | Sveinsson choreoretinal atrophy, 108985 (3)                                                                                                                                                                                                                                                                                              |
| TECR       | Mental retardation, autosomal recessive 14, 614020 (3)                                                                                                                                                                                                                                                                                   |
| TECTA      | Deafness, autosomal dominant 8/12, 601543 (3)/Deafness, autosomal recessive 21, 603629 (3)                                                                                                                                                                                                                                               |
| TEK        | Venous malformations, multiple cutaneous and mucosal, 600195 (3)                                                                                                                                                                                                                                                                         |
| TERT       | Bone marrow failure, telomere-related, 1, 614742 (3)/Coronary artery disease (3)/Dyskeratosis congenita, autosomal dominant 2, 613989 (3)/Dyskeratosis congenita, autosomal recessive 4, 613989 (3)/Leukemia, acute myeloid, 601626 (3)/Melanoma, cutaneous malignant, 9, 615134 (3)/Pulmonary fibrosis, telomere-related, 1, 614742 (3) |
| TET2       | Myelodysplastic syndrome, somatic, 614286 (3)                                                                                                                                                                                                                                                                                            |
| TF         | Atransferrinemia, 209300 (3)                                                                                                                                                                                                                                                                                                             |
| TFAP2A     | Branchiooculofacial syndrome, 113620 (3)                                                                                                                                                                                                                                                                                                 |
| TFAP2A-AS1 | Branchiooculofacial syndrome 113620 (3)                                                                                                                                                                                                                                                                                                  |
| TFAP2B     | Char syndrome, 169100 (3)                                                                                                                                                                                                                                                                                                                |
| TFE3       | Renal cell carcinoma, papillary, 1, 300854 (3)                                                                                                                                                                                                                                                                                           |
| TFG        | Spastic paraplegia 57, autosomal recessive, 615658 (3)/Hereditary motor and sensory neuropathy, proximal type, 604484 (3)                                                                                                                                                                                                                |
| TFR2       | Hemochromatosis, type 3, 604250 (3)                                                                                                                                                                                                                                                                                                      |
| TG         | Thyroid dysmorphogenesis 3, 274700 (3)/Autoimmune thyroid disease, susceptibility to, 3, 608175 (3)                                                                                                                                                                                                                                      |
| TGFB1      | Camurati-Engelmann disease, 131300 (3)/Cystic fibrosis lung disease, modifier of, 219700 (3)                                                                                                                                                                                                                                             |

TGFB2      Loeys-Dietz syndrome, type 4, 614816 (3)  
 TGFB3      Rienhoff syndrome, 615582 (3)/Arrhythmogenic right ventricular dysplasia 1, 107970 (3)  
             Corneal dystrophy, Avellino type, 607541 (3)/Corneal dystrophy, Groenouw type I, 121900 (3)/Corneal  
 TGFB1      dystrophy, Reis-Bucklers type, 608470 (3)/Corneal dystrophy, Thiel-Behnke type, 602082 (3)/Corneal  
             dystrophy, epithelial basement membrane, 121820 (3)/Corneal dystrophy, lattice type I, 122200 (3)/Corneal  
             dystrophy, lattice type IIIA, 608471 (3)  
 TGFB2      Loeys-Dietz syndrome, type 1, 609192 (3)/Multiple self-healing squamous epithelioma, susceptibility to,  
 132800 (3)  
 TGFB2      Colorectal cancer, hereditary nonpolyposis, type 6, 614331 (3)/Esophageal cancer, somatic, 133239  
 (3)/Loeys-Dietz syndrome, type 2, 610168 (3)  
 TGIF1      Holoprosencephaly  
 TGM1      Ichthyosis, congenital, autosomal recessive 1, 242300 (3)  
 TGM5      Peeling skin syndrome 2, 609796 (3)  
 TGM6      Spinocerebellar ataxia 35, 613908 (3)  
 TH         Segawa syndrome, recessive, 605407 (3)  
 THAP1      Dystonia 6, torsion, 602629 (3)  
 THBD      Thrombophilia due to thrombomodulin defect, 614486 (3)/Hemolytic uremic syndrome, atypical,  
 susceptibility to, 6, 612926 (3)  
 THOC2      Psychomotor retardation & cerebellar hypoplasia  
 THPO      Thrombocythemia 1, 187950 (3)  
 THRA      Hypothyroidism, congenital, nongoitrous, 6, 614450 (3)  
 THRB      Thyroid hormone resistance, 188570 (3)/Thyroid hormone resistance, autosomal recessive, 274300  
 (3)/Thyroid hormone resistance, selective pituitary, 145650 (3)  
 TICAM1     Encephalopathy, acute, infection-induced, susceptibility to, 6, 614850 (3)  
 TIMM8A     Deafness, X-linked 1, progressive (3)/Jensen syndrome, 311150 (3)/Mohr-Tranebjaerg syndrome, 304700 (3)  
 TIMP3      Sorsby fundus dystrophy, 136900 (3)  
 TINF2      Dyskeratosis congenita, autosomal dominant 3, 613990 (3)/Revesz syndrome, 268130 (3)  
 TJP2      Cholestasis, progressive familial intrahepatic 4, 615878 (3)/Hypercholanemia, familial, 607748 (3)  
 TK2        Mitochondrial DNA depletion syndrome 2 (myopathic type), 609560 (3)  
 TLL1      Atrial septal defect 6, 613087 (3)  
 TLR3      HIV1 infection, resistance to, 609423 (3)/Herpes simplex encephalitis, susceptibility to, 2 613002 (3)  
 TMC1      Deafness, autosomal dominant 36, 606705 (3)/Deafness, autosomal recessive 7, 600974 (3)  
 TMC6      Epidermodysplasia verruciformis, 226400 (3)  
 TMC8      Epidermodysplasia verruciformis, 226400 (3)  
 TMCO1     Craniofacial dysmorphism, skeletal anomalies, and mental retardation syndrome, 213980 (3)  
 TMEM114    Cataract, congenital  
 TMEM126A   Optic atrophy-7, 612989 (3)  
 TMEM135    Intellectual disability  
 TMEM138    Joubert syndrome 16, 614465 (3)  
 TMEM165    Congenital disorder of glycosylation, type IIIk, 614727 (3)  
 TMEM216    Joubert syndrome 2, 608091 (3)/Meckel syndrome 2, 603194 (3)  
 TMEM231    Joubert syndrome 20, 614970 (3)/Meckel syndrome, type 11, 615397 (3)  
 TMEM237    Joubert syndrome 14, 614424 (3)  
 TMEM43     Arrhythmogenic right ventricular dysplasia 5, 604400 (3)/Emery-Dreifuss muscular dystrophy 7, AD, 614302  
 (3)  
 TMEM5      Muscular dystrophy-dystroglycanopathy (congenital with brain and eye anomalies), type A, 10, 615041 (3)  
 TMEM67     COACH syndrome, 216360 (3)/Joubert syndrome 6, 610688 (3)/Meckel syndrome 3, 607361  
 (3)/Nephronophthisis 11, 613550 (3)/Bardet-Biedl syndrome 14, modifier of, 209900 (3)  
 TMEM70     Mitochondrial complex V (ATP synthase) deficiency, nuclear type 2, 614052 (3)  
 TMIE        Deafness, autosomal recessive 6, 600971 (3)  
 TMLHE      Epsilon-trimethyllysine hydroxylase deficiency, 300872 (3)  
 TMPO        Cardiomyopathy, dilated, 1T, 613740 (3)  
 TMPRSS15    Enteropeptidase deficiency  
 TMPRSS3    Deafness, autosomal recessive 8/10, 601072 (3)

Tmprss6 Iron-refractory iron deficiency anemia, 206200 (3)  
 TNF Asthma, susceptibility to, 600807 (3)/Dementia, vascular, susceptibility to (3)/Malaria, cerebral, susceptibility to, 611162 (3)/Migraine without aura, susceptibility to, 157300 (3)/Septic shock, susceptibility to (3)  
 TNFRSF10B Squamous cell carcinoma, head and neck, 275355 (3)  
 TNFRSF11A Osteolysis, familial expansile, 174810 (3)/Osteopetrosis, autosomal recessive 7, 612301 (3)/Paget disease of bone, 602080 (3)  
 TNFRSF11B Paget disease, juvenile, 239000 (3)  
 TNFRSF13B Immunodeficiency, common variable, 2, 240500 (3)/Immunoglobulin A deficiency 2, 609529 (3)  
 TNFRSF13C Immunodeficiency, common variable, 4, 613494 (3)  
 TNFRSF1A Periodic fever, familial, 142680 (3)/Multiple sclerosis, susceptibility to, 5, 614810 (3)  
 TNFSF11 Osteopetrosis, autosomal recessive 2, 259710 (3)  
 TNNC1 Cardiomyopathy, dilated, 1Z, 611879 (3)/Cardiomyopathy, familial hypertrophic, 13, 613243 (3)  
 TNNI2 Arthrogryposis multiplex congenita, distal, type 2B, 601680 (3)  
 TNNI3 Cardiomyopathy, dilated, 1FF, 613286 (3)/Cardiomyopathy, dilated, 2A, 611880 (3)/Cardiomyopathy, familial hypertrophic, 7, 613690 (3)/Cardiomyopathy, familial restrictive, 1, 115210 (3)  
 TNNT1 Nemaline myopathy 5, Amish type, 605355 (3)  
 TNNT2 Cardiomyopathy, dilated, 1D, 601494 (3)/Cardiomyopathy, familial hypertrophic, 2, 115195 (3)/Cardiomyopathy, familial restrictive, 3, 612422 (3)/Left ventricular noncompaction 6, 601494 (3)  
 TNNT3 Arthrogryposis, distal, type 2B, 601680 (3)  
 TNXB Ehlers-Danlos syndrome, autosomal dominant, hypermobility type, 130020 (3)/Ehlers-Danlos syndrome, autosomal recessive, due to tenascin X deficiency, 606408 (3)/Vesicoureteral reflux 8, 615963 (3)  
 TOPORS Retinitis pigmentosa 31, 609923 (3)  
 TOR1A Torsion dystonia, early onset  
 TP53 Adrenal cortical carcinoma, 202300 (3)/Breast cancer, 114480 (3)/Choroid plexus papilloma, 260500 (3)/Colorectal cancer, 114500 (3)/Hepatocellular carcinoma, 114550 (3)/Li-Fraumeni syndrome, 151623 (3)/Nasopharyngeal carcinoma, 607107 (3)/Osteosarcoma, 259500 (3)/Pancreatic cancer, 260350 (3)/Basal cell carcinoma 7, 614740 (3)/Glioma susceptibility 1, 137800 (3)  
 TP63 ADULT syndrome, 103285 (3)/Ectrodactyly, ectodermal dysplasia, and cleft lip/palate syndrome 3, 604292 (3)/Hay-Wells syndrome, 106260 (3)/Limb-mammary syndrome, 603543 (3)/Orofacial cleft 8, 129400 (3)/Rapp-Hodgkin syndrome, 129400 (3)/Split-hand/foot malformation 4, 605289 (3)  
 TPI1 Hemolytic anemia due to triosephosphate isomerase deficiency, 615512 (3)  
 TPK1 Thiamine metabolism dysfunction syndrome 5 (episodic encephalopathy type), 614458 (3)  
 TPM1 Cardiomyopathy, dilated, 1Y, 611878 (3)/Cardiomyopathy, familial hypertrophic, 3, 115196 (3)/Left ventricular noncompaction 9, 611878 (3)  
 TPM2 Arthrogryposis multiplex congenita, distal, type 1, 108120 (3)/Arthrogryposis, distal, type 2B, 601680 (3)/CAP myopathy 2, 609285 (3)/Nemaline myopathy 4, autosomal dominant, 609285 (3)  
 TPM3 CAP myopathy 1, 609284 (3)/Myopathy, congenital, with fiber-type disproportion, 255310 (3)/Nemaline myopathy 1, autosomal dominant or recessive, 609284 (3)  
 TPMT 6-mercaptopurine sensitivity, 610460 (3)  
 TPO Thyroid dysmorphogenesis 2A, 274500 (3)  
 TPP1 Ceroid lipofuscinosis, neuronal, 2, 204500 (3)/Spinocerebellar ataxia, autosomal recessive 7, 609270 (3)  
 TPRN Deafness, autosomal recessive 79, 613307 (3)  
 TRAPPC2 Spondyloepiphyseal dysplasia tarda, 313400 (3)  
 TRAPPC9 Mental retardation, autosomal recessive 13, 613192 (3)  
 TRDN Ventricular tachycardia, catecholaminergic polymorphic, 5, with or without muscle weakness, 615441 (3)  
 TREH Trehalase deficiency, 612119 (1)  
 TREM2 Nasu-Hakola disease, 221770 (3)  
 TRESX1 Aicardi-Goutieres syndrome 1, dominant and recessive, 225750 (3)/Chilblain lupus, 610448 (3)/Vasculopathy, retinal, with cerebral leukodystrophy, 192315 (3)/Systemic lupus erythematosus, susceptibility to, 152700 (3)  
 TRH Thyrotropin-releasing hormone deficiency, 275120 (1)  
 TRHR Thyrotropin-releasing hormone resistance, generalized (3)  
 TRIM24 Thyroid carcinoma, papillary, 188550 (3)

TRIM32 Bardet-Biedl syndrome 11, 615988 (3)/Muscular dystrophy, limb-girdle, type 2H, 254110 (3)  
 TRIM33 Thyroid carcinoma, papillary, 188550 (3)  
 TRIM37 Mulibrey nanism, 253250 (3)  
 TRIOBP Deafness, autosomal recessive 28, 609823 (3)  
 TRIP11 Achondrogenesis, type IA, 200600 (3)  
 TRMT1 Intellectual disability  
 TRMU Liver failure, transient infantile, 613070 (3)/Deafness, mitochondrial, modifier of, 580000 (3)  
 TRPC6 Glomerulosclerosis, focal segmental, 2, 603965 (3)  
 TRPM1 Night blindness, congenital stationary (complete), 1C, autosomal recessive, 613216 (3)  
 TRPM4 Progressive familial heart block, type IB, 604559 (3)  
 TRPM6 Hypomagnesemia 1, intestinal, 602014 (3)  
 TRPS1 Trichorhinophalangeal syndrome, type I, 190350 (3)/Trichorhinophalangealsyndrome, type III, 190351 (3)  
 TRPV3 Olmsted syndrome, 614594 (3)  
 Brachyolmia type 3, 113500 (3)/Digital arthropathy-brachydactyly, familial, 606835 (3)/Hereditary motor and sensory neuropathy, type IIc, 606071 (3)/Metatropic dysplasia, 156530 (3)/Parastremmatic dwarfism, 168400 (3)/SED, Maroteaux type, 184095 (3)/Scapuloperoneal spinal muscular atrophy, 181405 (3)/Spinal muscular atrophy, distal, congenital nonprogressive, 600175 (3)/Spondylometaphyseal dysplasia, Kozlowski type, 184252 (3)/[Sodium serum level QTL 1], 613508 (3)  
 TRPV4 Focal cortical dysplasia, Taylor balloon cell type, 607341 (3)/Lymphangioliomyomatosis, 606690 (3)/Tuberous sclerosis-1, 191100 (3)  
 TSC1 Lymphangioliomyomatosis, somatic, 606690 (3)/Tuberous sclerosis-2, 613254 (3)  
 TSC2 Pontocerebellar hypoplasia type 2B, 612389 (3)  
 TSEN2 Pontocerebellar hypoplasia type 2C, 612390 (3)  
 TSEN34 Pontocerebellar hypoplasia type 5, 610204 (3)/Pontocerebellar hypoplasia type 2A, 277470 (3)/Pontocerebellar hypoplasia type 4, 225753 (3)  
 TSEN54 Combined oxidative phosphorylation deficiency 3, 610505 (3)  
 TSFM Breast cancer, somatic, 114480 (3)  
 TSG101 Hypothyroidism, congenital, nongoitrous 4, 275100 (3)  
 TSHB Hyperthyroidism, familial gestational, 603373 (3)/Hyperthyroidism, nonautoimmune, 609152 (3)/Hypothyroidism, congenital, nongoitrous, 1 275200 (3)/Thyroid adenoma, hyperfunctioning, somatic (3)/Thyroid carcinoma with thyrotoxicosis (3)  
 TSHR Aural atresia, congenital, 607842 (3)  
 TSHZ1 Exudative vitreoretinopathy 5, 613310 (3)  
 TSPAN12 Mental retardation, X-linked 58, 300210 (3)  
 TSPAN7 Deafness, autosomal recessive 98, 614861 (3)  
 TSPEAR Sudden infant death with dysgenesis of the testes syndrome, 608800 (3)  
 TSPYL1 Spinocerebellar ataxia 11, 604432 (3)  
 TTBK2 Mitochondrial complex III deficiency, nuclear type 2, 615157 (3)  
 TTC19 Nephronophthisis 12, 613820 (3)/Short-rib thoracic dysplasia 4 with or without polydactyly, 613819 (3)  
 TTC21B Trichohepatoenteric syndrome 1, 222470 (3)  
 TTC37 Gastrointestinal defects and immunodeficiency syndrome 243150 (3)  
 TTC7A Retinitis pigmentosa 51, 613464 (3)/Bardet-Biedl syndrome 8, 615985 (3)  
 TTC8 Mental retardation, autosomal recessive 39, 615541 (3)  
 TTI2 Cardiomyopathy, dilated, 1G, 604145 (3)/Cardiomyopathy, familial hypertrophic, 9, 613765 (3)/Muscular dystrophy, limb-girdle, type 2J, 608807 (3)/Myopathy, early-onset, with fatal cardiomyopathy, 611705 (3)/Myopathy, proximal, with early respiratory muscle involvement, 603689 (3)/Tibial muscular dystrophy, tardive, 600334 (3)  
 TTN Ataxia with isolated vitamin E deficiency, 277460 (3)  
 TTPA Amyloidosis, hereditary, transthyretin-related, 105210 (3)/Carpal tunnel syndrome, familial, 115430 (3)/[Dystransthyretinemic hyperthyroxinemia], 145680 (3)  
 TTR Lissencephaly 3, 611603 (3)  
 TUBA1A Polymicrogyria with optic nerve hypoplasia, 613180 (3)  
 TUBA8 Macrothrombocytopenia, autosomal dominant, TUBB1-related, 613112 (3)  
 TUBB1 Polymicrogyria, symmetric or asymmetric, 610031 (3)  
 TUBB2B

|         |                                                                                                                                                                                                                                                                                                                                                  |
|---------|--------------------------------------------------------------------------------------------------------------------------------------------------------------------------------------------------------------------------------------------------------------------------------------------------------------------------------------------------|
| TUBB3   | Cortical dysplasia, complex, with other brain malformations 1, 614039 (3)/Fibrosis of extraocular muscles, congenital, 3A, 600638 (3)                                                                                                                                                                                                            |
| TUBGCP6 | Microcephaly and chorioretinopathy, autosomal recessive, 1, 251270 (3)                                                                                                                                                                                                                                                                           |
| TUFM    | Combined oxidative phosphorylation deficiency 4, 610678 (3)                                                                                                                                                                                                                                                                                      |
| TULP1   | Leber congenital amaurosis 15, 613843 (3)/Retinitis pigmentosa 14, 600132 (3)                                                                                                                                                                                                                                                                    |
| TUSC3   | Mental retardation, autosomal recessive 7, 611093 (3)                                                                                                                                                                                                                                                                                            |
| TWIST1  | Craniosynostosis, type 1, 123100 (3)/Robinow-Sorauf syndrome, 180750 (3)/Saethre-Chotzen syndrome with eyelid anomalies, 101400 (3)/Saethre-Chotzen syndrome, 101400 (3)                                                                                                                                                                         |
| TWIST2  | Focal facial dermal dysplasia 3, Setleis type, 227260 (3)                                                                                                                                                                                                                                                                                        |
| TXNRD2  | Cardiomyopathy, dilated                                                                                                                                                                                                                                                                                                                          |
| TYK2    | Immunodeficiency 35, 611521 (3)                                                                                                                                                                                                                                                                                                                  |
| TYMP    | Mitochondrial DNA depletion syndrome 1 (MNGIE type), 603041 (3)                                                                                                                                                                                                                                                                                  |
| TYR     | Albinism, oculocutaneous, type IA, 203100 (3)/Albinism, oculocutaneous, type IB, 606952 (3)/Waardenburg syndrome/albinism, digenic, 103470 (3)/[Skin/hair/eye pigmentation 3, blue/green eyes], 601800 (3)/[Skin/hair/eye pigmentation 3, light/dark/freckling skin], 601800 (3)/Melanoma, cutaneous malignant, susceptibility to, 8, 601800 (3) |
| TYROBP  | Nasu-Hakola disease, 221770 (3)                                                                                                                                                                                                                                                                                                                  |
| TYRP1   | Albinism, oculocutaneous, type III, 203290 (3)/[Skin/hair/eye pigmentation, variation in, 11 (Melanesian blond hair)], 612271 (3)                                                                                                                                                                                                                |
| UBA1    | Spinal muscular atrophy, X-linked 2, infantile, 301830 (3)                                                                                                                                                                                                                                                                                       |
| UBB     | Cleft palate, isolated, 119540 (2)                                                                                                                                                                                                                                                                                                               |
| UBE2A   | Mental retardation, X-linked syndromic, Nascimento-type, 300860 (3)                                                                                                                                                                                                                                                                              |
| UBE3A   | Angelman syndrome, 105830 (3)                                                                                                                                                                                                                                                                                                                    |
| UBIAD1  | Corneal dystrophy, Schnyder type, 121800 (3)                                                                                                                                                                                                                                                                                                     |
| UBQLN2  | Amyotrophic lateral sclerosis 15, with or without frontotemporal dementia, 300857 (3)                                                                                                                                                                                                                                                            |
| UBR1    | Johanson-Blizzard syndrome, 243800 (3)                                                                                                                                                                                                                                                                                                           |
| UBR7    | Intellectual disability                                                                                                                                                                                                                                                                                                                          |
| UFD1L   | Catch 22 syndrome                                                                                                                                                                                                                                                                                                                                |
| UGT1A1  | Crigler-Najjar syndrome, type I, 218800 (3)/Crigler-Najjar syndrome, type II, 606785 (3)/Hyperbilirubinemia, familial transient neonatal, 237900 (3)/[Bilirubin, serum level of, QTL1], 601816 (3)/[Gilbert syndrome], 143500 (3)                                                                                                                |
| UMOD    | Glomerulocystic kidney disease with hyperuricemia and isosthenuria, 609886 (3)/Hyperuricemic nephropathy, familial juvenile 1, 162000 (3)/Medullary cystic kidney disease 2, 603860 (3)                                                                                                                                                          |
| UMPS    | Orotic aciduria, 258900 (3)                                                                                                                                                                                                                                                                                                                      |
| UNC119  | Cone-rod dystrophy (3)/                                                                                                                                                                                                                                                                                                                          |
| UNC13D  | Hemophagocytic lymphohistiocytosis, familial, 3, 608898 (3)                                                                                                                                                                                                                                                                                      |
| UNC93B1 | Herpes simplex encephalitis, susceptibility to, 1, 610551 (3)                                                                                                                                                                                                                                                                                    |
| UNG     | Immunodeficiency with hyper IgM, type 5, 608106 (3)                                                                                                                                                                                                                                                                                              |
| UPB1    | Beta-ureidopropionase deficiency, 613161 (3)                                                                                                                                                                                                                                                                                                     |
| UPF3B   | Mental retardation, X-linked, syndromic 14, 300676 (3)                                                                                                                                                                                                                                                                                           |
| UPK3A   | Renal hypodysplasia                                                                                                                                                                                                                                                                                                                              |
| UQCRB   | Mitochondrial complex III deficiency, nuclear type 3, 615158 (3)                                                                                                                                                                                                                                                                                 |
| UQCRQ   | Mitochondrial complex III deficiency, nuclear type 4, 615159 (3)                                                                                                                                                                                                                                                                                 |
| UROCI   | Urocanase deficiency, 276880 (3)                                                                                                                                                                                                                                                                                                                 |
| UROD    | Porphyria cutanea tarda, 176100 (3)/Porphyria, hepatoerythropoietic, 176100 (3)                                                                                                                                                                                                                                                                  |
| UROS    | Porphyria, congenital erythropoietic, 263700 (3)                                                                                                                                                                                                                                                                                                 |
| USB1    | Poikiloderma with neutropenia 604173 (3)                                                                                                                                                                                                                                                                                                         |
| USH1C   | Deafness, autosomal recessive 18A, 602092 (3)/Usher syndrome, type 1C, 276904 (3)                                                                                                                                                                                                                                                                |
| USH1G   | Usher syndrome 1g                                                                                                                                                                                                                                                                                                                                |
| USH2A   | Retinitis pigmentosa 39, 613809 (3)/Usher syndrome, type 2A, 276901 (3)                                                                                                                                                                                                                                                                          |
| USP9Y   | Spermatogenic failure, Y-linked, 2, 415000 (3)                                                                                                                                                                                                                                                                                                   |
| UVSSA   | UV-sensitive syndrome 3, 614640 (3)                                                                                                                                                                                                                                                                                                              |
| VANGL1  | Caudal regression syndrome, 600145 (3)/Neural tube defects, 182940 (3)                                                                                                                                                                                                                                                                           |
| VAPB    | Amyotrophic lateral sclerosis 8, 608627 (3)/Spinal muscular atrophy, late-onset, Finkel type, 182980 (3)                                                                                                                                                                                                                                         |

VCAN Wagner syndrome 1, 143200 (3)

VCL Cardiomyopathy, dilated, 1W, 611407 (3)/Cardiomyopathy, familial hypertrophic, 15, 613255 (3)

VCP Amyotrophic lateral sclerosis 14, with or without frontotemporal dementia, 613954 (3)/Inclusion body myopathy with early-onset Paget disease and frontotemporal dementia 1, 167320 (3)

VDR Osteoporosis, involutional, 166710 (1)/Rickets, vitamin D-resistant, type IIA, 277440 (3)

VHL Erythrocytosis, familial, 2, 263400 (3)/Hemangioblastoma, cerebellar, somatic (3)/Pheochromocytoma, 171300 (3)/Renal cell carcinoma, somatic, 144700 (3)/von Hippel-Lindau syndrome, 193300 (3)

VIPAS39 Arthrogyrosis, renal dysfunction, and cholestasis 2 613404 (3)

VKORC1 Vitamin K-dependent clotting factors, combined deficiency of, 2 607473 (3)/Warfarin resistance 122700 (3)

VLDLR Cerebellar hypoplasia and mental retardation with or without quadrupedal locomotion 1, 224050 (3)

VLDLR-AS1 Cerebellar hypoplasia and mental retardation with or without quadrupedal locomotion 1 224050 (3)

VMA21 X-linked myopathy with excessive autophagy

VPS13A Choreoacanthocytosis, 200150 (3)

VPS13B Cohen syndrome, 216550 (3)

VPS33B Arthrogyrosis, renal dysfunction, and cholestasis 1, 208085 (3)

VPS35 Parkinson disease 17, 614203 (3)

VPS37A Spastic paraplegia 53, autosomal recessive, 614898 (3)

VRK1 Pontocerebellar hypoplasia type 1A, 607596 (3)

VSX1 Corneal dystrophy, posterior polymorphous, 1, 122000 (3)/Craniofacial anomalies and anterior segment dysgenesis syndrome, 614195 (3)/Keratoconus 1, 148300 (3)

VSX2 Microphthalmia with coloboma 3, 610092

VWF von Willebrand disease, type 1, 193400 (3)/von Willebrand disease, types 2A, 2B, 2M, and 2N, 613554 (3)/von Willebrand disease, type 3, 277480 (3)

WAS Neutropenia, severe congenital, X-linked, 300299 (3)/Thrombocytopenia, X-linked, 313900 (3)/Thrombocytopenia, X-linked, intermittent, 313900 (3)/Wiskott-Aldrich syndrome, 301000 (3)

WDPCP Bardet-Biedl syndrome 15, 615992 (3)/

WDR11 Hypogonadotropic hypogonadism 14 with or without anosmia, 614858 (3)

WDR19 Cranioectodermal dysplasia 4, 614378 (3)/Nephronophthisis 13, 614377 (3)/Short-rib thoracic dysplasia 5 with or without polydactyly, 614376 (3)

WDR35 Cranioectodermal dysplasia 2, 613610 (3)/Short-rib thoracic dysplasia 7 with or without polydactyly, 614091 (3)

WDR36 Glaucoma 1, open angle, G, 609887 (3)

WDR45L Intellectual disability

WDR62 Microcephaly 2, primary, autosomal recessive, with or without cortical malformations, 604317 (3)

WDR65 Van der Woude syndrome 2 606713 (3)

WDR72 Amelogenesis imperfecta, type IIA3, 613211 (3)

WDR81 Cerebellar ataxia, mental retardation, and dysequilibrium syndrome 2, 610185 (3)

WFS1 Cataract 41, 116400 (3)/Deafness, autosomal dominant 6/14/38, 600965 (3)/Wolfram syndrome, 222300 (3)/Wolfram-like syndrome, autosomal dominant, 614296 (3)/Diabetes mellitus, noninsulin-dependent, association with, 125853 (3)

WHSC1 Wolf-Hirschhorn syndrome

WHSC1L1 Leukemia, acute myeloid, 601626 (3)

WHSC2 Wolf-Hirschhorn syndrome

WIPF1 Wiskott-Aldrich syndrome 2, 614493 (3)

WISP3 Arthropathy, progressive pseudoreumatoid, of childhood, 208230 (3)/Spondyloepiphyseal dysplasia tarda with progressive arthropathy, 208230 (3)

WNK1 Neuropathy, hereditary sensory and autonomic, type II, 201300 (3)/Pseudohypoadosteronism, type IIC, 614492 (3)

WNK4 Pseudohypoadosteronism, type IIB, 614491 (3)

WNT10A Odontoonychodermal dysplasia, 257980 (3)/Schopf-Schulz-Passarge syndrome, 224750 (3)/Tooth agenesis, selective, 4, 150400 (3)

WNT10B Split-hand/foot malformation 6, 225300 (3)

WNT3 Tetra-amelia syndrome, 273395 (3)

WNT4 Mullerian aplasia and hyperandrogenism, 158330 (3)/SERKAL syndrome, 611812 (3)



|          |                                                                                                                                                                                                    |
|----------|----------------------------------------------------------------------------------------------------------------------------------------------------------------------------------------------------|
| WNT5A    | Robinow syndrome, autosomal dominant, 180700 (3)                                                                                                                                                   |
| WNT7A    | Fuhrmann syndrome, 228930 (3)/Ulna and fibula, absence of, with severe limb deficiency, 276820 (3)                                                                                                 |
| WRAP53   | Dyskeratosis congenita, autosomal recessive 3, 613988 (3)                                                                                                                                          |
| WRN      | Werner syndrome                                                                                                                                                                                    |
| WT1      | Denys-Drash syndrome, 194080 (3)/Fraser syndrome, 136680 (3)/Meacham syndrome, 608978 (3)/Mesothelioma, somatic, 156240 (3)/Nephrotic syndrome, type 4, 256370 (3)/Wilms tumor, type 1, 194070 (3) |
| WWOX     | Epileptic encephalopathy, early infantile, 28, 616211 (3)/Esophageal squamous cell carcinoma, somatic, 133239 (3)/Spinocerebellar ataxia, autosomal recessive 12, 614322 (3)                       |
| XDH      | Xanthinuria, type I, 278300 (3)                                                                                                                                                                    |
| XIAP     | Lymphoproliferative syndrome, X-linked, 2, 300635 (3)                                                                                                                                              |
| XK       | McLeod syndrome with or without chronic granulomatous disease, 300842 (3)                                                                                                                          |
| XPA      | Xeroderma pigmentosum, group A, 278700 (3)                                                                                                                                                         |
| XPC      | Xeroderma pigmentosum, group C, 278720 (3)                                                                                                                                                         |
| XPNPEP3  | Nephronophthisis-like nephropathy 1, 613159 (3)                                                                                                                                                    |
| YARS     | Charcot-Marie-Tooth disease, dominant intermediate C, 608323 (3)                                                                                                                                   |
| YARS2    | Myopathy, lactic acidosis, and sideroblastic anemia 2, 613561 (3)                                                                                                                                  |
| YWHAE    | Left ventricular noncompaction & hypoplasia of the corpus callosum                                                                                                                                 |
| ZAP70    | Selective T-cell defect, 269840 (3)                                                                                                                                                                |
| ZBTB16   | Leukemia, acute promyelocytic, PL2F/RARA type (3)/Skeletal defects, genital hypoplasia, and mental retardation, 612447 (3)                                                                         |
| ZBTB24   | Immunodeficiency-centromeric instability-facial anomalies syndrome-2, 614069 (3)                                                                                                                   |
| ZBTB40   | Intellectual disability                                                                                                                                                                            |
| ZC3H14   | Intellectual disability, nonsyndromic, autosomal recessive                                                                                                                                         |
| ZC4H2    | Wieacker-Wolff syndrome, 314580 (3)                                                                                                                                                                |
| ZCCHC12  | Mental retardation                                                                                                                                                                                 |
| ZCCHC8   | Intellectual disability                                                                                                                                                                            |
| ZDHHC15  | Mental retardation, X-linked 91, 300577 (3)                                                                                                                                                        |
| ZDHHC9   | Mental retardation, X-linked syndromic, Raymond type, 300799 (3)                                                                                                                                   |
| ZEB1     | Corneal dystrophy, Fuchs endothelial, 6, 613270 (3)/Corneal dystrophy, posterior polymorphous, 3, 609141 (3)                                                                                       |
| ZEB2     | Mowat-Wilson syndrome 235730 (3)                                                                                                                                                                   |
| ZFHX4    | Ptosis, congenital, 178300 (2)                                                                                                                                                                     |
| ZFP57    | Diabetes mellitus, transient neonatal, 1, 601410 (3)                                                                                                                                               |
| ZFPM2    | 46,XY sex reversal 9, 616067 (3)/Diaphragmatic hernia 3, 610187 (3)/Tetralogy of Fallot, 187500 (3)                                                                                                |
| ZFYVE26  | Spastic paraplegia 15, autosomal recessive, 270700 (3)                                                                                                                                             |
| ZFYVE27  | Spastic paraplegia 33, autosomal dominant, 610244 (3)                                                                                                                                              |
| ZIC2     | Holoprosencephaly-5, 609637 (3)                                                                                                                                                                    |
| ZIC3     | Congenital heart defects, nonsyndromic, 1, X-linked, 306955 (3)/Heterotaxy, visceral, 1, X-linked 306955 (3)/VACTERL association, X-linked, 314390 (3)                                             |
| ZMPSTE24 | Mandibuloacral dysplasia with type B lipodystrophy, 608612 (3)/Restrictive dermopathy, lethal, 275210 (3)                                                                                          |
| ZNF238   | Abnormalities of the corpus callosum                                                                                                                                                               |
| ZNF41    | Mental retardation                                                                                                                                                                                 |
| ZNF423   | Joubert syndrome 19, 614844 (3)/Nephronophthisis 14, 614844 (3)                                                                                                                                    |
| ZNF469   | Brittle cornea syndrome 1 229200 (3)                                                                                                                                                               |
| ZNF513   | Retinitis pigmentosa 58, 613617 (3)                                                                                                                                                                |
| ZNF526   | Intellectual disability                                                                                                                                                                            |
| ZNF592   | Spinocerebellar ataxia, autosomal recessive 5, 606937 (3)                                                                                                                                          |
| ZNF644   | Myopia 21, autosomal dominant, 614167 (3)                                                                                                                                                          |
| ZNF674   | Mental retardation, X-linked                                                                                                                                                                       |
| ZNF711   | Mental retardation, X-linked 97, 300803 (3)                                                                                                                                                        |
| ZNF750   | Seborrhea-like dermatitis with psoriasiform elements, 610227 (3)                                                                                                                                   |
| ZNF81    | Mental retardation, X-linked 45, 300498 (3)                                                                                                                                                        |

---

---

\*: (1)The disorder is placed on the map due to its association with a gene, but the underlying defect is not known; (2)The disorder was placed on the map by statistical methods; (3)The molecular basis of the disorder is known
