# Supplementary material for: Clinical characteristics and genetic expansion of 46,XY disorders of sex development children in a Chinese prospective study
Source: PubMed Central journal article supplement — Endocr Connect. 2023 Sep 4;12(10):e230029. doi: 10.1530/EC-23-0029 (PMC10503230; doi:10.1530/ec-23-0029), 2023-09-04
Supplement: supplementary_table_2.pdf [file supplementary_table_2.pdf]

**Supplementary Table 2. Phenotype and genotype of subjects with VUS variants**

| Patient ID | Age   | Phenotype                                                                                                                                                                                                                                | Transcript ID | Genetic variants                                       | Zygotity | Family inheritance | Inheritance mode | Classification | gnomAD frequency | Popmax                            | Reference |
|------------|-------|------------------------------------------------------------------------------------------------------------------------------------------------------------------------------------------------------------------------------------------|---------------|--------------------------------------------------------|----------|--------------------|------------------|----------------|------------------|-----------------------------------|-----------|
| 1909       | 6y3m  | predominantly female external genitalia, cryptorchidism                                                                                                                                                                                  | NM_000233.3   | <i>LHCGR</i> c.1541G>C, p.Cys514Ser                    | homo     | F+M                | AR               | VUS            | /                | /                                 | /         |
| 2036       | 6y    | micropenis, hypogonadism                                                                                                                                                                                                                 | NM_000044.3   | <i>AR</i> c.142G>T, p.Ala48Ser                         | hemi     | M                  | XR               | VUS            | 9.492E-06        | 0                                 | /         |
| 2473*      | 12y   | micropenis, small testes                                                                                                                                                                                                                 | NM_032551.4   | <i>KISS1R</i> c.631G>A, p.Ala211Thr                    | het      | M                  | AR               | VUS            | 0.0001812        | 0.001506 (East Asian)             | /         |
| 2692       | 1y1m  | hypogonadism, micropenis, cryptorchidism                                                                                                                                                                                                 | NM_144773.2   | <i>PROKR2</i> c.533G>C, p.Trp178Ser                    | het      | F                  | AD               | VUS            | 0.0002227        | 0.00231 (East Asian)              | 17054399  |
| 2786*      | 1y7m  | micropenis, cryptorchidism                                                                                                                                                                                                               | NM_000348.3   | <i>SRD5A2</i> c.702C>G, p.Phe234Leu                    | het      | F                  | AR               | VUS            | 0.0002037        | 0.004319 (East Asian)             | 15266301  |
| 3828*      | 10y   | micropenis                                                                                                                                                                                                                               | NM_000348.3   | <i>SRD5A2</i> c.457T>C, p.Phe153Leu                    | het      | F                  | AR               | VUS            | /                | /                                 | /         |
| 3874*      | 7y7m  | prepenile scrotum, hypospadias                                                                                                                                                                                                           | NM_021044.2   | <i>DHH</i> c.968G>A, p.Gly323Asp                       | het      | M                  | AR               | VUS            | /                | /                                 | /         |
| 4274*      | 13y   | gynecomastia (Tanner B4)                                                                                                                                                                                                                 | NM_000145.3   | <i>FSHR</i> c.227A>C, p.Glu76Ala                       | het      | F                  | AR               | VUS            | /                | /                                 | /         |
| 4431*      | 14y   | gynecomastia (Tanner B4)                                                                                                                                                                                                                 | NM_000941.2   | <i>POR</i> c.1196_1204delCCTCGGAGC, p.Pro399_Glu401del | het      | M                  | AR               | VUS            | /                | /                                 | 21843508  |
| 4500       | 3y    | micropenis, small testes                                                                                                                                                                                                                 | NM_144773.2   | <i>PROKR2</i> c.892C>T, p.Arg298Cys                    | het      | M                  | AD               | VUS            | /                | /                                 | /         |
| 4940       | 7y    | clitorimegaly, absent Müllerian structures, cryptorchidism                                                                                                                                                                               | NM_000102.3   | <i>CYP17A1</i> c.785T>G, p.Met262Arg                   | het      | F                  | AR               | VUS            | /                | /                                 | /         |
|            |       |                                                                                                                                                                                                                                          |               | <i>CYP17A1</i> c.1193C>T, p.Ala398Val                  | het      | M                  | AR               | VUS            | /                | /                                 | 14552333  |
| 5337       | 4m    | micropenis, perineal hypospadias                                                                                                                                                                                                         | NM_000044.3   | <i>AR</i> c.626G>A, p.Gly209Glu                        | hemi     | M                  | XR               | VUS            | /                | /                                 | /         |
| 5421       | 12y   | gonadal dysgenesis, micropenis, perineal hypospadias                                                                                                                                                                                     | NM_005921.1   | <i>MAP3K1</i> c.2062C>G, p.Leu688Val                   | het      | M                  | AD               | VUS            | /                | /                                 | /         |
| 6500       | 5y    | idiopathic short stature, gonadal dysplasia, female external genitalia, utero-like tissue                                                                                                                                                | NM_000163.4   | <i>GHR</i> c.136+1Gly>Ala                              | homo     | F+M                | AD/AR            | VUS            | /                | /                                 | /         |
| 6928*      | 6m    | perineal hypospadias, penile curvature                                                                                                                                                                                                   | NM_000197.1   | <i>HSD17B3</i> c.466T>A, p.Cys156Ser                   | het      | M                  | AR               | VUS            | /                | /                                 | /         |
| 8585       | 13y   | micropenis, hypogonadotropic hypogonadism                                                                                                                                                                                                | NM_144773.2   | <i>PROKR2</i> c.1004C>T, p.Thr335Met                   | het      | M                  | AD               | VUS            | 0.00000701       | 0.00000701 (European non-finnish) | /         |
| 9171       | 10y   | micropenis, unilateral cryptorchidism, hypogonadotropic hypogonadism                                                                                                                                                                     | NM_023110.2   | <i>FGFR1</i> c.1961A>G, p.Tyr654Cys                    | het      | F                  | AD               | VUS            | /                | /                                 | /         |
| 10724*     | 2y5m  | micropenis, unilateral cryptorchidism, hypospadias                                                                                                                                                                                       | NM_000348.3   | <i>SRD5A2</i> c.408C>A, p.Tyr136*                      | het      | de novo            | AR               | VUS            | /                | /                                 | /         |
| 13317      | 6y4m  | micropenis, bilateral cryptorchidism, gonadal dysplasia                                                                                                                                                                                  | NM_012082.3   | <i>ZFPM2</i> c.1124_1127del, p.Gln375Argfs*40          | het      | M                  | AD               | VUS            | /                | /                                 | /         |
| 17641      | 2m    | short stature, penile curvature, hypospadias, bilateral cryptorchidism, micropenis, penile scrotal translocation, scrotal division, special features (high hairline, forehead protrusion), premature delivery, small for gestational age | NM_000435.2   | <i>NOTCH3</i> c.2129A>G, p.Tyr710Cys                   | het      | M                  | AD               | VUS            | /                | /                                 | 24000151  |
| 18385      | 7m    | micropenis, bilateral cryptorchidism                                                                                                                                                                                                     | NM_144773.2   | <i>PROKR2</i> c.533G>C, p.Trp178Ser                    | het      | M                  | AD               | VUS            | 0.0002227        | 0.00231 (East Asian)              | 17054399  |
| 20685      | 10y3m | gynecomastia, micropenis                                                                                                                                                                                                                 | NM_000044.6   | <i>AR</i> c.1159A>T, p.Ile387Phe                       | hemi     | M                  | XR               | VUS            | /                | /                                 | /         |
| 21257      | 8y7m  | micropenis                                                                                                                                                                                                                               | NM_144773.2   | <i>PROKR2</i> c.533G>C, p.Trp178Ser                    | het      | M                  | AD               | VUS            | 0.0002227        | 0.00231 (East Asian)              | 17054399  |

Abbreviations: hemi, hemizygote; het, heterozygote; homo, homozygote; F, father; M, mother; XL, X chromosome-linked; AR, autosomal recessive; AD, autosomal dominant; P, pathogenic; LP, likely pathogenic.

\*: Variant zygosity does not match the inheritance mode of detected genes.
