# Supplementary material for: Clinical characteristics and genetic expansion of 46,XY disorders of sex development children in a Chinese prospective study
Source: PubMed Central journal article supplement — Endocr Connect. 2023 Sep 4;12(10):e230029. doi: 10.1530/EC-23-0029 (PMC10503230; doi:10.1530/ec-23-0029), 2023-09-04
Supplement: supplementary_table_3.pdf [file supplementary_table_3.pdf]

**Supplementary Table 3. Pathogenicity classification of all variants in this study.**

| Patient ID | Transcript ID | Genetic variants                                       | Zygoty | Hereditate mode | Classification | Evidence level |             |             | gnomAD frequency | Popmax                            | Reference                    |
|------------|---------------|--------------------------------------------------------|--------|-----------------|----------------|----------------|-------------|-------------|------------------|-----------------------------------|------------------------------|
|            |               |                                                        |        |                 |                | Strong         | Moderate    | Supporting  |                  |                                   |                              |
| 1880       | NM_003140.2   | <i>SRY</i> c.397C>T, p.Arg133Trp                       | hemi   | YL              | P              | PS1+PS2        | PM2         | PP3+PP4     | /                | /                                 | 9150734, 8353496             |
| 1886       | NM_000348.3   | <i>SRD5A2</i> c.419_421delinsATTC                      | het    | AR              | P              | PVS1           | PM2         | PP4         | /                | /                                 | /                            |
| 1909       | NM_000233.3   | <i>LHCGR</i> c.1541G>C, p.Cys514Ser                    | homo   | AR              | VUS            | /              | PM2         | PP3+PP4     | /                | /                                 | /                            |
| 2036       | NM_000044.3   | <i>AR</i> c.142G>T, p.Ala48Ser                         | hemi   | XR              | VUS            | /              | PM2         | PP3+PP4     | 0.000009492      | 0                                 | /                            |
| 2061       | NM_000216.2   | <i>ANOS1</i> del Exon 4-5                              | hemi   | XR              | LP             | PVS1           | PM2         | /           | /                | /                                 | 16882753                     |
| 2356       | NM_000406.2   | <i>GNRHR</i> c.806C>T, p.Thr269Met                     | homo   | AR              | LP             | /              | PM2+PM5     | PP1+PP2+PP3 | 0.00001194       | 0.00000293 (European non-Finnish) | 22031817, 26708526, 27544332 |
| 2367       | NM_000102.3   | <i>CYP17A1</i> c.985_987delinsAA, p.Tyr329Kfs*90       | homo   | AR              | P              | PVS1           | PM2         | PP4         | 0.00004599       | 0.0006317 (East Asian)            | /                            |
| 2420       | NM_000348.3   | <i>SRD5A2</i> c.680G>A, p.Arg227Gln                    | homo   | AR              | P              | PS3            | PM1+PM2     | PP3+PP4     | 0.0002235        | 0.004817 (East Asian)             | 8784107                      |
| 2439       | NM_004959.4   | <i>NR5A1</i> c.721C>T, p.Arg241Trp                     | het    | AD              | LP             | PS2            | PM1+PM2     | PP3         | /                | /                                 | 29095814                     |
| 2473       | NM_032551.4   | <i>KISS1R</i> c.631G>A, p.Ala211Thr                    | het    | AR              | VUS            | /              | PM1+PM2     | PP3         | 0.0001812        | 0.001506 (East Asian)             | /                            |
| 2540       | NM_000044.3   | <i>AR</i> c.1787G>A, p.Cys596Tyr                       | hemi   | XR              | P              | PS2            | PM1+PM2     | PP3+PP4     | /                | /                                 | /                            |
| 2692       | NM_144773.2   | <i>PROKR2</i> c.533G>C, p.Trp178Ser                    | het    | AD              | VUS            | PS3+ BS1       | /           | PP3         | 0.0002227        | 0.00231 (East Asian)              | 17054399                     |
| 2752       | NM_000044.3   | <i>AR</i> c.2528T>C, p.Ile843Thr                       | hemi   | XR              | LP             | /              | PM2+PM5     | PP3+PP4     | /                | /                                 | 8723113                      |
| 2782       | NM_000348.3   | <i>SRD5A2</i> c.680G>A, p.Arg227Gln                    | het    | AR              | P              | PS3            | PM1+PM2     | PP3+PP4     | 0.0002235        | 0.004817 (East Asian)             | 8784107                      |
| 2786       | NM_000348.3   | <i>SRD5A2</i> c.281G>A, p.Arg94Lys                     | het    | AR              | LP             | /              | PM2+PM3     | PP3+PP4     | /                | /                                 | /                            |
|            |               | <i>SRD5A2</i> c.702C>G, p.Phe234Leu                    | het    | AR              | VUS            | /              | PM2         | PP3         | 0.0002037        | 0.004319 (East Asian)             | 15266301                     |
| 2892       | NM_000348.3   | <i>SRD5A2</i> c.607G>A, p.Gly203Ser                    | het    | AR              | P              | PS1            | PM1+PM2     | PP3+PP4     | 0.00002629       | 0.0001567 (East Asian)            | 9135696, 15266301, 32713132  |
|            |               | <i>SRD5A2</i> c.737G>A, p.Arg246Gln                    | het    | AR              | LP             | /              | PM1+PM2+PM5 | PP3+PP4     | 0.000126         | 0.0004087 (South)                 | 1522235, 26446026            |
| 2955       | NM_000216.2   | <i>ANOS1</i> c.1712G>A, p.Trp571*                      | hemi   | XR              | P              | PVS1+PS2       | PM2         | /           | /                | /                                 | /                            |
|            |               | <i>LHCGR</i> c.681-1Gly>Ala                            | het    | AR              | P              | PVS1           | PM2         | PP3+PP4     | /                | /                                 | 29305568                     |
| 3167       | NM_000233.3   | <i>LHCGR</i> c.1582_1585delATAT, p.Ile528*             | het    | AR              | P              | PVS1           | PM2+PM3     | PP4         | /                | /                                 | 29305568                     |
| 3828       | NM_000348.3   | <i>SRD5A2</i> c.457T>C, p.Phe153Leu                    | het    | AR              | VUS            | /              | PM2         | PP3         | /                | /                                 | /                            |
| 3874       | NM_021044.2   | <i>DHH</i> c.968G>A, p.Gly323Asp                       | het    | AR              | VUS            | /              | PM2         | PP3         | /                | /                                 | /                            |
| 3879       | NM_000216.2   | <i>ANOS1</i> c.984C>G, p.Tyr328*                       | hemi   | XR              | LP             | PVS1           | PM2         | /           | /                | /                                 | 8989261                      |
| 3973       | NM_005634.2   | <i>SOX3</i> c.424C>A, p.Pro142Thr                      | hemi   | XL              | LP             | PS3            | PM2         | PP4         | /                | /                                 | 30125608                     |
| 4004       | NM_000044.3   | <i>AR</i> c.1175C>G, p.Pro392Arg                       | hemi   | XR              | LP             | /              | PM1+PM2     | PP3+PP4     | 0.00001776       | 0                                 | 10571951                     |
| 4119       | NM_003309.3   | <i>TSPYL1</i> c.67C>T, p.Gln23*                        | het    | AR              | LP             | PVS1           | PM2         | /           | 0.0001441        | 0.001463 (East Asian)             | /                            |
| 4136       | NM_001059.2   | <i>TACR3</i> c.196dupG, p.Ala66fs*84                   | het    | AR              | LP             | PVS1           | PM2         | /           | /                | /                                 | /                            |
| 4208       | NM_000044.3   | <i>AR</i> c.2256G>A, p.Trp752*                         | hemi   | XR              | P              | PVS1           | PM2         | PP4         | /                | /                                 | 19463997, 10458483, 27284311 |
| 4274       | NM_000145.3   | <i>FSHR</i> c.227A>C, p.Glu76Ala                       | het    | AR              | VUS            | /              | PM1+PM2     | PP3         | /                | /                                 | /                            |
| 4431       | NM_000941.2   | <i>POR</i> c.1196_1204delCCTCGGAGC, p.Pro399_Glu401del | het    | AR              | VUS            | /              | PM2+PM4     | /           | /                | /                                 | 21843508                     |
| 4500       | NM_144773.2   | <i>PROKR2</i> c.892C>T, p.Arg298Cys                    | het    | AD              | VUS            | /              | PM2         | PP3         | /                | /                                 | /                            |
|            |               | <i>SRD5A2</i> c.269A>C, p.His90Pro                     | het    | AR              | LP             | /              | PM2+PM3     | PP3         | /                | /                                 | /                            |
| 4622       | NM_000348.3   | <i>SRD5A2</i> c.680G>A, p.Arg227Gln                    | het    | AR              | P              | PS3            | PM1+PM2     | PP3+PP4     | 0.0002235        | 0.004817 (East Asian)             | 8784107                      |
| 4940       | NM_000102.3   | <i>CYP17A1</i> c.785T>G, p.Met262Arg                   | het    | AR              | VUS            | /              | PM2         | PP3+PP4     | /                | /                                 | /                            |
|            |               | <i>CYP17A1</i> c.1193C>T, p.Ala398Val                  | het    | AR              | VUS            | /              | PM2         | PP3+PP4     | /                | /                                 | 14552333                     |
| 4986       | NM_004959.4   | <i>NR5A1</i> c.251G>A, p.Arg84His                      | het    | AD              | P              | PS3            | PM1+PM2+PM5 | PP3         | /                | /                                 | 17694559, 27899157, 24434652 |
|            |               | <i>AMH</i> c.585C>A, p.Tyr195*                         | het    | AR              | LP             | PVS1           | PM2         | /           | /                | /                                 | /                            |
| 5015       | NM_000479.3   | <i>AMH</i> c.1165G>T, p.Glu389*                        | het    | AR              | LP             | PVS1           | PM2         | /           | 1.97884E-05      | /                                 | 31277073, 32172781           |
| 5175       | NM_005270.4   | <i>GLI2</i> c.3463_3464delGA, p.Asp1155Arg fs*39       | het    | AD              | P              | PVS1+PS2       | PM2         | /           | /                | /                                 | /                            |
| 5337       | NM_000044.3   | <i>AR</i> c.626G>A, p.Gly209Glu                        | hemi   | XR              | VUS            | /              | PM2         | PP3         | /                | /                                 | /                            |
| 5421       | NM_005921.1   | <i>MAP3K1</i> c.2062C>G, p.Leu688Val                   | het    | AD              | VUS            | /              | PM1+PM2     | PP3         | /                | /                                 | /                            |
| 5589       | NM_005270.4   | <i>GLI2</i> c.3137delG, p.Gly1046Ala fs*84             | het    | AD              | LP             | PVS1           | PM2         | /           | /                | /                                 | /                            |
| 6500       | NM_000163.4   | <i>GHR</i> c.136+1Gly>Ala                              | homo   | AD/AR           | VUS            | /              | PM2         | PP3         | /                | /                                 | /                            |
| 6606       | NM_005270.4   | <i>GLI2</i> c.3640C>T, p.Gln1214*                      | het    | AD              | LP             | PVS1           | PM2         | /           | /                | /                                 | /                            |
| 6791       | NM_000348.3   | <i>SRD5A2</i> c.680G>A, p.Arg227Gln                    | homo   | AR              | P              | PS3            | PM1+PM2     | PP3+PP4     | 0.0002235        | /                                 | 8784107                      |
| 6928       | NM_000197.1   | <i>HSD17B3</i> c.466T>A, p.Cys156Ser                   | het    | AR              | VUS            | /              | PM1+PM2     | PP3         | /                | /                                 | /                            |
|            |               | <i>SRD5A2</i> c.656delT, p.Phe219Ser fs*60             | het    | AR              | P              | PVS1           | PM2+PM3     | PP4         | 0.00000657       | /                                 | 20736251                     |
| 7847       | NM_000348.3   | <i>SRD5A2</i> c.680G>A, p.Arg227Gln                    | het    | AR              | P              | PS3            | PM1+PM2     | PP3+PP4     | 0.0002235        | 0.004817 (East Asian)             | 8784107                      |
| 7929       | NM_004959.4   | <i>NR5A1</i> c.848G>T, p.Cys283Phe                     | het    | AD              | LP             | /              | PM1+PM2+PM5 | PP3         | /                | /                                 | /                            |
| 8065       | NM_000044.3   | <i>AR</i> del Exon5-8                                  | hemi   | XR              | P              | PVS1           | PM2         | PP4         | /                | /                                 | 8339746                      |
| 8585       | NM_144773.2   | <i>PROKR2</i> c.1004C>T, p.Thr335Met                   | het    | AD              | VUS            | /              | PM2         | PP3         | 0.00000701       | 0.00000701 (European non-finnish) | /                            |
| 8803       | NM_000044.4   | <i>AR</i> c.2270A>G, p.Asn757Ser                       | hemi   | XR              | LP             | /              | PM1+PM2     | PP3+PP4     | 0.000008892      | 0                                 | 8723113                      |
| 8945       | NM_000475.4   | <i>NR0B1</i> c.1169-2Ala>Gly                           | hemi   | XL              | P              | PVS1+PS2       | PM2         | PP3         | /                | /                                 | /                            |
| 9052       | NM_000044.4   | <i>AR</i> c.2495G>A, p.Arg832Gln                       | hemi   | XR              | LP             | /              | PM1+PM2+PM5 | PP3+PP4     | 0.000008987      | 0                                 | 2082179, 26778393, 30815925  |
| 9171       | NM_023110.2   | <i>FGFR1</i> c.1961A>G, p.Tyr654Cys                    | het    | AD              | VUS            | /              | PM1+PM2     | PP3         | /                | /                                 | /                            |
|            |               | <i>SRD5A2</i> c.650C>A, p.Ala217Glu                    | het    | AR              | LP             | /              | PM1+PM2+PM3 | PP3+PP4     | /                | /                                 | /                            |
| 9242       | NM_000348.3   | <i>SRD5A2</i> c.680G>A, p.Arg227Gln                    | het    | AR              | P              | PS3            | PM1+PM2     | PP3+PP4     | 0.0002235        | 0.004817 (East Asian)             | 8784107                      |

|       |                    |                                                 |      |    |      |          |             |             |            |                           |                                              |
|-------|--------------------|-------------------------------------------------|------|----|------|----------|-------------|-------------|------------|---------------------------|----------------------------------------------|
| 9431  | NM_000348.3        | <i>SRD5A2</i> c.607G>A,p.Gly203Ser              | het  | AR | P    | PS1      | PM1+PM2+PM3 | PP3+PP4     | 0.00002629 | 0.0001567<br>(East Asian) | 9135696                                      |
|       |                    | <i>SRD5A2</i> c.680G>A,p.Arg227Gln              | het  | AR | P    | PS3      | PM1+PM2     | PP3+PP4     | 0.0002235  | 0.004817<br>(East Asian)  | 8784107                                      |
| 9471  | NM_000044.4        | <i>AR</i> c.4G>A, p.Glu2Lys                     | hemi | XR | LP   | PS3      | PM2         | PP3+PP4     | /          | /                         | 8823308                                      |
| 9482  | NM_000348.3        | <i>SRD5A2</i> c.680G>A,p.Arg227Gln              | homo | AR | P    | PS3      | PM1+PM2     | PP3+PP4     | 0.0002235  | 0.004817<br>(East Asian)  | 8784107                                      |
| 10066 | NM_000044.4        | <i>AR</i> c.899G>C, p.Gly300Ala                 | hemi | XR | LP   | /        | PM1+PM2     | PP3+PP4     | 0.00002657 | 0.00001494<br>(European)  | /                                            |
| 10239 | /                  | 7q33-q35Del                                     | het  | -  | P    | PVS1+PS2 | PM2         | PP3         | /          | /                         | /                                            |
| 10482 | NM_002934.4        | <i>PTPN11</i> c.1472C>A,p.Pro491His             | het  | AD | P    | PS2      | PM1+PM2     | PP2+PP3+PP4 | /          | /                         | 17020470                                     |
| 10724 | NM_000348.3        | <i>SRD5A2</i> c.408C>A,p.Tyr136*                | het  | AR | VUS  | /        | PM2         | PP3+PP4     | /          | /                         | /                                            |
| 10800 | /                  | 2q33.1Del                                       | het  | -  | LP   | PS2      | PM2         | PP3         | /          | /                         | /                                            |
| 10892 | NM_002934.4        | <i>PTPN11</i> c.922A>G,p.Asn308Asp              | het  | AD | P    | PS2      | PM1+PM2     | PP2+PP3+PP4 | 0.00001193 | 0                         | 11704759                                     |
| 10908 | NM_000044.4        | <i>AR</i> c.1737delC, p.Cys580Alafs*46          | hemi | XR | P    | PVS1     | PM2         | PP3+PP4     | /          | /                         | 19463997                                     |
| 11072 | NM_000044.4        | <i>AR</i> c.2113C>T, p.Leu705Phe                | hemi | XR | LP   | /        | PM1+PM2     | PP3+PP4     | /          | /                         | 25613104<br>1406794,<br>1944596,<br>12576851 |
| 11757 | <i>NM_000348.3</i> | <i>SRD5A2</i> c.16C>T,p.Gln6*                   | het  | AR | P    | PVS1     | PM2+PM3     | PP3+PP4     | /          | /                         | /                                            |
|       |                    | <i>SRD5A2</i> c.680G>A,p.Arg227Gln              | het  | AR | P    | PS3      | PM1+PM2     | PP3+PP4     | 0.0002235  | 0.004817<br>(East Asian)  | 8784107                                      |
| 11867 | NM_000348.3        | <i>SRD5A2</i> c.680G>A,p.Arg227Gln              | homo | AR | P    | PS3      | PM1+PM2     | PP3+PP4     | 0.0002235  | 0.004817<br>(East Asian)  | 8784107                                      |
| 12343 | NM_017780.3        | <i>CHD7</i> c.5211-2A>G                         | het  | AD | P    | PVS1+PS2 | PM2         | PP3+PP4     | /          | /                         | /                                            |
| 12480 | /                  | 18p11.31-p11.21del                              | het  | -  | P    | PVS1+PS2 | PM2         | PP3         | /          | /                         | /                                            |
| 12888 | /                  | 16p11.2del                                      | het  | -  | P    | PVS1+PS2 | PM2         | PP3         | /          | /                         | /                                            |
| 13048 | /                  | 17p11.2del                                      | het  | -  | P    | PVS1+PS2 | PM2         | PP3         | /          | /                         | /                                            |
| 13317 | NM_012082.3        | <i>ZFPM2</i><br>c.1124_1127del,p.Gln375Argfs*40 | het  | AD | VUS* | PS3      | PM2         | PP3         | /          | /                         | /                                            |
| 13421 | NM_000044.4        | <i>AR</i> c.2020T>C, p.Phe674Leu                | hemi | XR | LP   | /        | PM1+PM2     | PP3+PP4     | /          | /                         | /                                            |
| 14250 | NM_000348.3        | <i>SRD5A2</i> c.607G>A,p.Gly203Ser              | het  | AR | P    | PS1      | PM1+PM2+PM3 | PP3+PP4     | 0.00002629 | 0.0001567<br>(East Asian) | 9135696,<br>15266301,<br>32713132            |
|       |                    | <i>SRD5A2</i> c.680G>A,p.Arg227Gln              | het  | AR | P    | PS3      | PM1+PM2     | PP3+PP4     | 0.0002235  | 0.004817<br>(East Asian)  | 8784107                                      |
| 14317 | NM_003106.3        | <i>SOX2</i> c.259A>G,p.Lys87Glu                 | het  | AD | LP   | PS2      | PM2         | PP3+PP4     | /          | /                         | /                                            |
| 14376 | NM_000216.2        | <i>ANOS1</i> c.515G>A,p.Cys172Tyr               | hemi | XR | LP   | PS1      | PM2         | PP3+PP4     | /          | /                         | 11297579                                     |
| 15071 | NM_006941.3        | <i>SOX10</i> c.506C>T,p.Pro169Leu               | het  | AD | LP   | PS2      | PM2         | PP3+PP4     | /          | /                         | 25256313                                     |
| 15128 | NM_005996.3        | <i>TBX3</i> c.932dupA,p.Glu312Glyfs*6           | het  | AD | P    | PVS1+PS2 | PM2         | PP4         | /          | /                         | /                                            |
| 15362 | NM_000479.3        | <i>AMH</i> c.259-270del,p.Val187-Ala90del       | het  | AR | LP   | /        | PM2+PM3     | PP3+PP4     | /          | /                         | /                                            |
| 15562 | NM_006941.3        | <i>AMH</i> c.1432C>T,p.Leu478Phe                | het  | AR | LP   | /        | PM2+PM3     | PP3+PP4     | /          | /                         | /                                            |
|       |                    | <i>SOX10</i> c.506C>T,p.Pro169Leu               | het  | AD | LP   | PS2      | PM2         | PP3+PP4     | /          | /                         | 25256313                                     |
| 16213 | NM_000348.3        | <i>SRD5A2</i> c.680G>A,p.Arg227Gln              | homo | AR | P    | PS3      | PM1+PM2     | PP3+PP4     | 0.0002235  | 0.004817<br>(East Asian)  | 8784107                                      |
| 16255 | NM_023110.2        | <i>FGFR1</i> c.2173T>C,p.Cys725Arg              | het  | AD | LP   | PS2      | PM2         | PP3+PP4     | /          | /                         | /                                            |
| 16746 | NM_000348.3        | <i>SRD5A2</i> c.680G>A,p.Arg227Gln              | homo | AR | P    | PS3      | PM1+PM2     | PP3+PP4     | 0.0002235  | 0.004817<br>(East Asian)  | 8784107                                      |
| 17641 | NM_000435.2        | <i>NOTCH3</i> c.2129A>G, p.Tyr710Cys            | het  | AD | VUS  | /        | PM2         | PP4         | /          | /                         | 24000151                                     |
| 18385 | NM_144773.2        | <i>PROKR2</i> c.533G>C,p.Trp178Ser              | het  | AD | VUS  | PS3      | /           | PP3         | 0.0002227  | 0.00231<br>(East Asian)   | 17054399                                     |
| 18423 | NM_006912.6        | <i>RIT1</i> c.170C>G,p.Ala57Gly                 | het  | AD | P    | PS1+PS2  | PM2         | PP4         | /          | /                         | 23791108                                     |
| 18553 | NM_000348.3        | <i>SRD5A2</i> c.680G>A,p.Arg227Gln              | homo | AR | P    | PS3      | PM1+PM2     | PP3+PP4     | 0.0002235  | 0.004817<br>(East Asian)  | 8784107                                      |
|       |                    | <i>SRD5A2</i> c.467G>A, p.Gly156Glu             | het  | AR | LP   | /        | PM2+PM3     | PP3+PP4     | 0.00006677 | 0                         | /                                            |
| 19697 | NM_000348.3        | <i>SRD5A2</i> c.680G>A,p.Arg227Gln              | het  | AR | P    | PS3      | PM1+PM2     | PP3+PP4     | 0.0002235  | 0.004817<br>(East Asian)  | 8784107                                      |
|       |                    | <i>AR</i> c.2521C>T, p.Arg841Cys                | hemi | XR | LP   | /        | PM1+PM2     | PP3+PP4     | /          | /                         | 11788673                                     |
| 20472 | NM_000044.6        | <i>AR</i> c.1175C>G, p.Pro392Arg                | hemi | XR | LP   | /        | PM1+PM2     | PP3+PP4     | 0.00001776 | 0                         | 10571951                                     |
| 20685 | NM_000044.6        | <i>AR</i> c.1159A>T, p.Ile387Phe                | hemi | XR | VUS  | /        | PM2         | PP3+PP4     | /          | /                         | /                                            |
| 21257 | NM_144773.2        | <i>PROKR2</i> c.533G>C,p.Trp178Ser              | het  | AD | VUS  | PS3      | /           | PP3         | 0.0002227  | 0.00231<br>(East Asian)   | 17054399                                     |
| 21288 | NM_017934.7        | <i>PHIP</i> c.600+1G>C                          | het  | AD | LP   | PS2      | PM2         | PP3         | /          | /                         | /                                            |

Abbreviations: PVS, pathogenic very strong; PS, pathogenic strong; PM, pathogenic moderate; PP, pathogenic supporting; BS, benign strong; P, pathogenic; LP, likely pathogenic; VUS, uncertain significance.

\*: This variant on *ZFPM2* was inherited from the subject's mother who had no similar DSD phenotype, thus considering VUS.
